# Supplementary material for: From weak to strong interactions: structural and electron topology analysis of the continuum from the supramolecular chalcogen bonding to covalent bonds
Source: Royal Society of Chemistry journal article supplement (doi:10.1039/d1cp05441d), 2022-01-01
Supplement: d1cp05441d1.pdf [file d1cp05441d1.pdf]

## Supporting Information

for

### From weak to strong interactions: Structural and electron topology analysis of the of the continuum from the supramolecular chalcogen bonding to covalent bonds

Daniel K. Miller,<sup>a</sup> Ivan Yu. Chernyshov,<sup>b</sup> Yury V. Torubaev,<sup>c\*</sup> Sergiy V. Rosokha<sup>a\*</sup>

a) Chemistry Department, Ball State University, Muncie, IN, 47306, USA. E-mail: svrosokha@bsu.edu

b) TheoMat group, ChemBio Cluster, ITMO University, Lomonosova 9, St. Petersburg, 191002, Russia

c) N.S. Kurnakov Institute of General and Inorganic Chemistry, Russian Academy of Sciences, GSP-1,  
Leninsky prospect, 31, Moscow, 119991, Russia

| Content                                                                                                                                       | Pages    |
|-----------------------------------------------------------------------------------------------------------------------------------------------|----------|
| Distance and angle distributions in the Ch...X contacts (from CSD analysis, Figures S1 – S6)                                                  | S2-S7    |
| Refcodes and structures of the solid-state associations comprising Se...Br and Te...I contacts chosen for the QTAIM analysis (Figures S7, S8) | S8,S9    |
| The dependencies of the kinetic (G(r)) and potential (V(r)) energy densities at BCPs on the interatomic separations (Figure S9)               | S10      |
| Distance distribution of all and line-of-sight C-H...Te and C <sub>sp2</sub> ...Te contacts (Figures S10, S11)                                | S10-S11  |
| Comparison of G, V, and H values for promolecules with those in the bonded systems (Figures S12)                                              | S11      |
| CSD Refcodes, experimental and calculated Ch... Hal distances (Tables S1 and S2)                                                              | S12, S13 |
| Characteristics of BCPs in the experimental and calculated structures containing Se...Br and Te...I contacts (Tables S3 – S8)                 | S13-S19  |
| CSD refcodes, energies and coordinates of the experimental and calculated structures containing Se...Br and Te...I contacts (Tables S9-S14)   | S20-S74  |

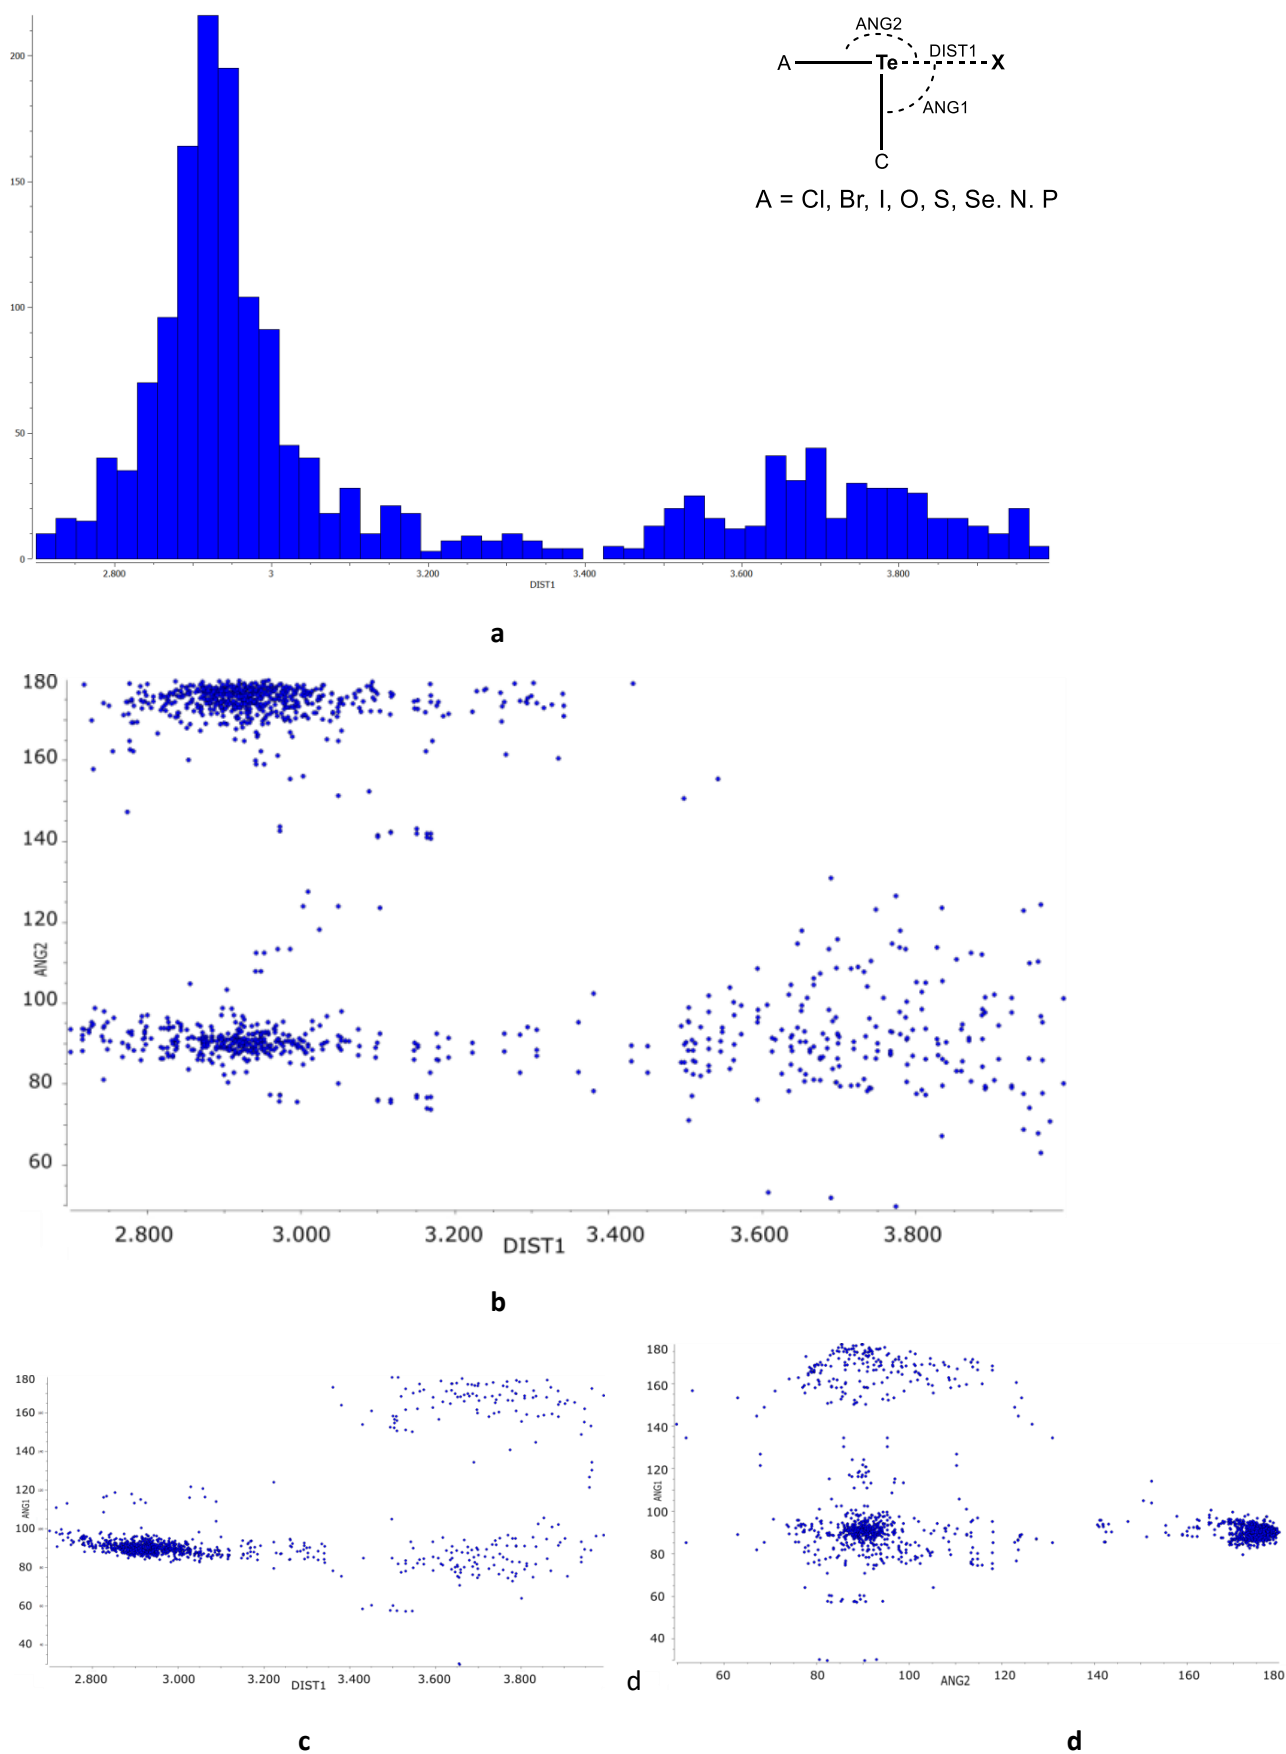

**Figure S1.** X = I: a) Te---I distance distribution; b) scattering of the Te---I distance (DIST1) with the and A-Te-I angles (ANG2); c) scattering of the Te---I distance (DIST1) with the and C-Te-I angles (ANG1); d) scattering of the C-Te-I angles (ANG1) with the C-Te-I angles (ANG2).

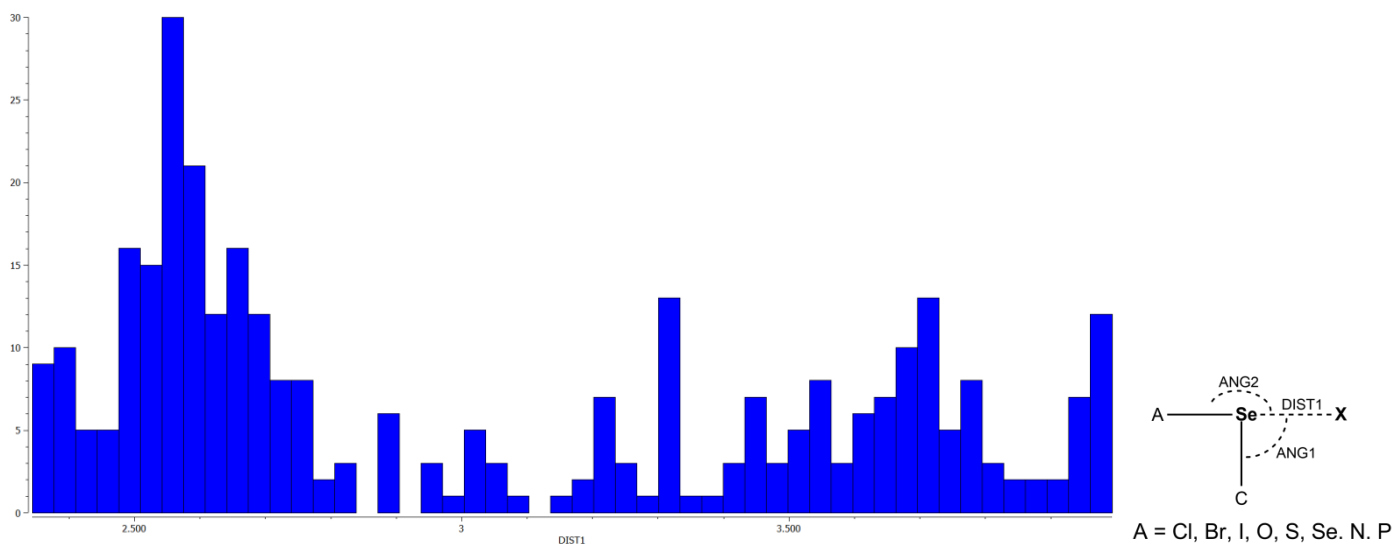

a

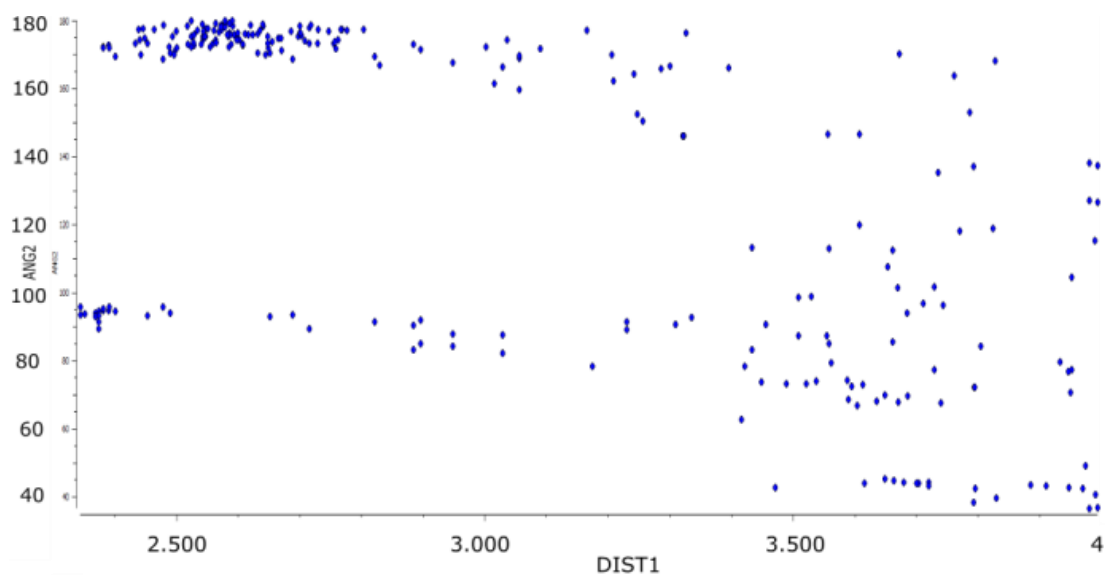

b

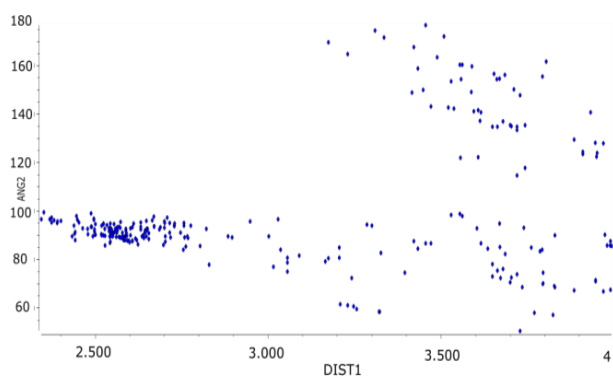

c

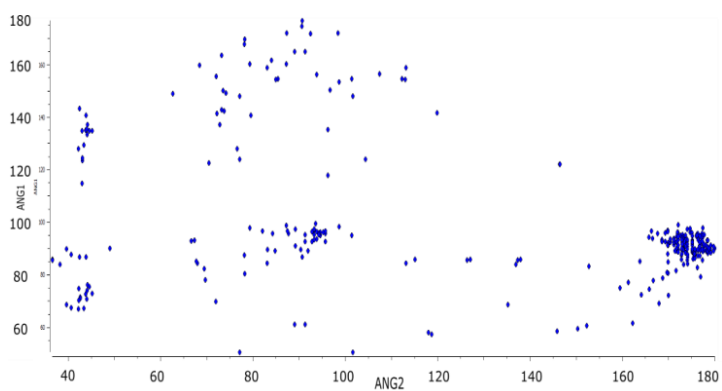

d

**Figure S2.** X = Br, 122 entry: a) Se...Br distance distribution; b) scattering of the Se---Br distance (DIST1) with the and A-Se-Br angles (ANG2); c) scattering of the Se---Br distance (DIST1) with the and C-Se-Br angles (ANG1); d) scattering of the C-Se-Br angles (ANG1) with the C-Se-Br angles (ANG1).

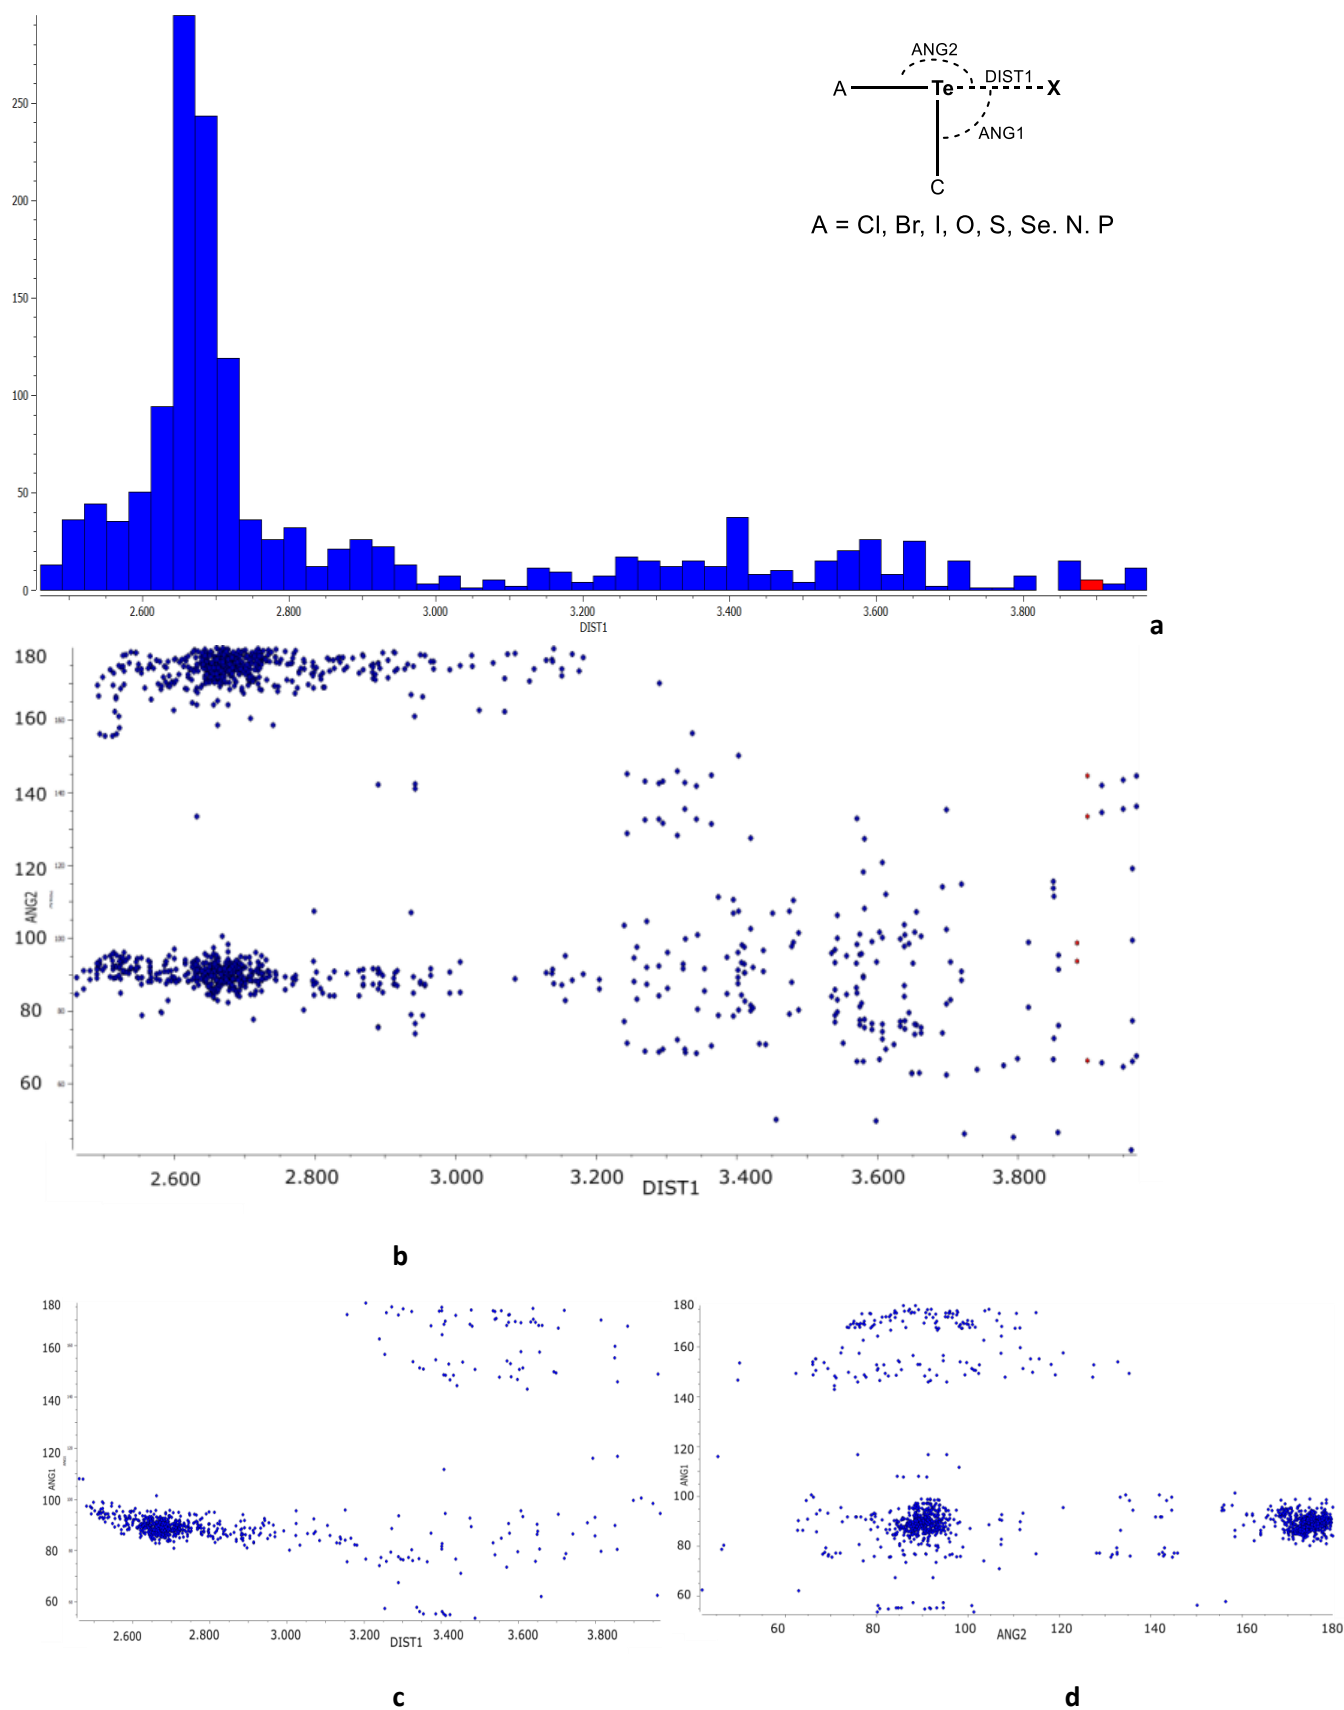

**Figure S3.** X = Br, 227 entries a) Te...Br distance distribution; b) scattering of the Te...Br distance (DIST1) with the and A-Te-Br angles (ANG2); c) scattering of the Te...Br distance (DIST1) with the and C-Te-Br angles (ANG1); d) scattering of the C-Te-Br angles (ANG1) with the C-Te-Br angles (ANG1).

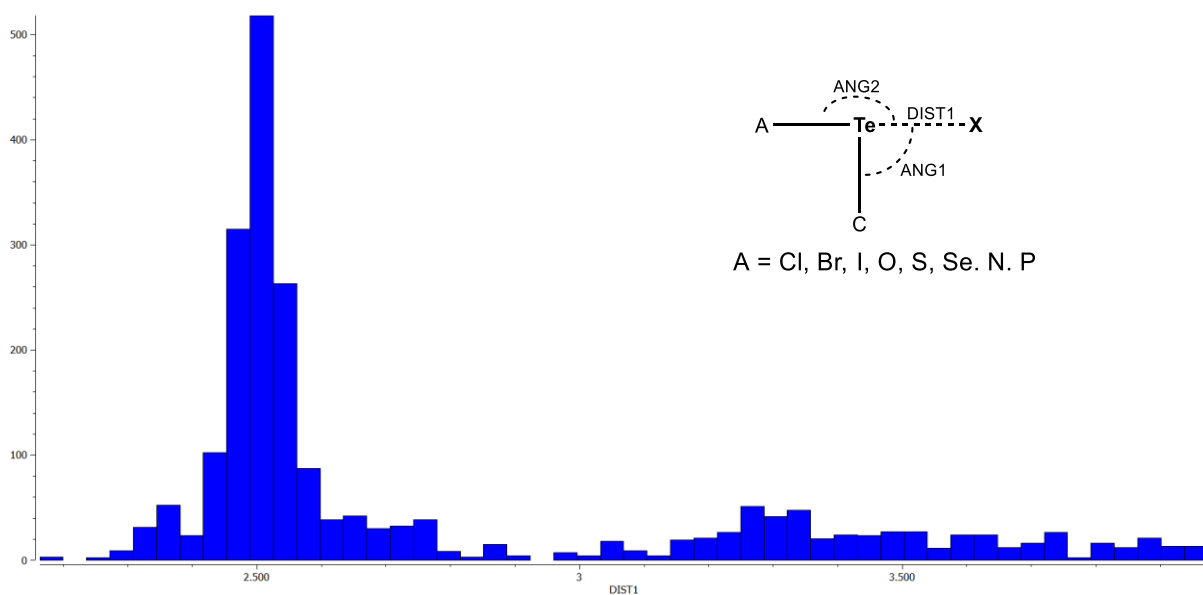

a

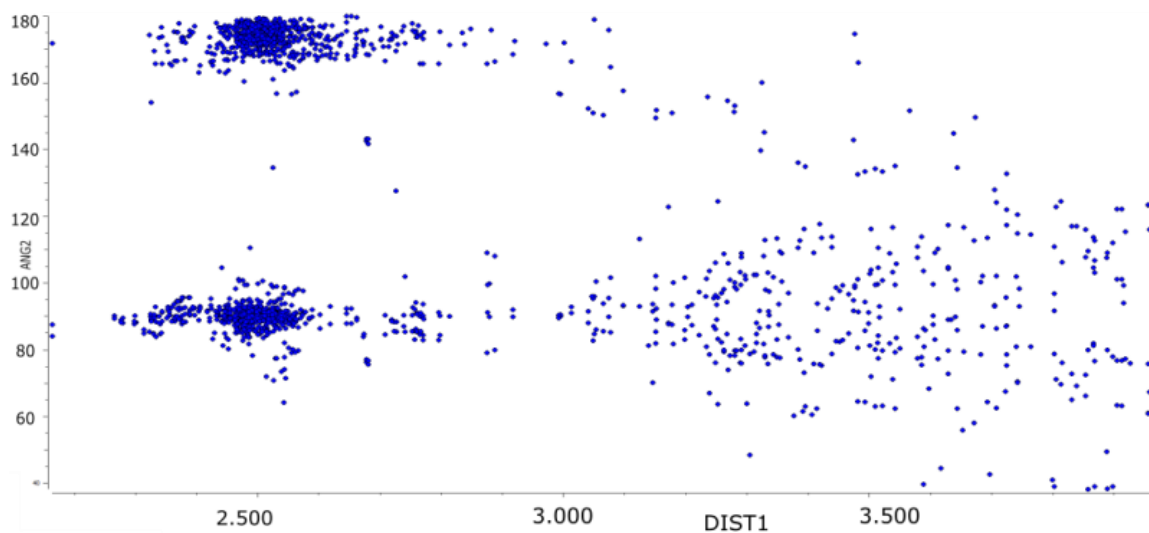

b

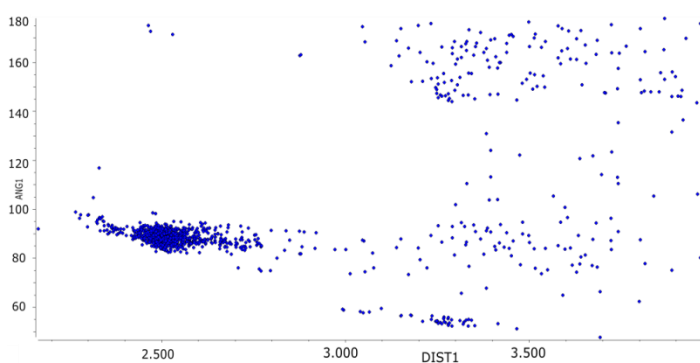

c

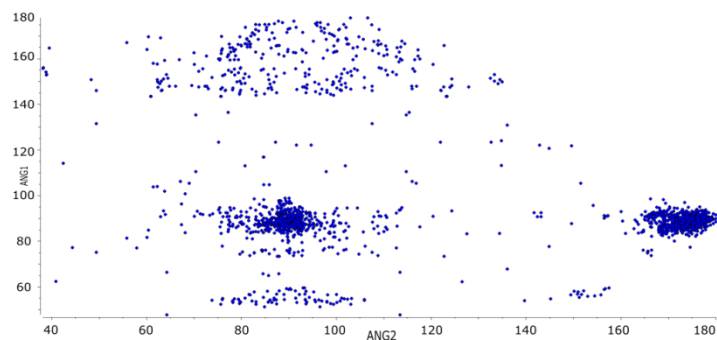

d

**Figure S4.** X = Cl, 357 entries: a) Te...Cl distance distribution; b) scattering of the Te-Cl distance (DIST1) with the and A-Te-Cl angles (ANG2); c) scattering of the Te...Cl distance (DIST1) with the and C-Te-Cl angles (ANG1); d) scattering of the C-Te-Cl angles (ANG1) with the C-Te-Cl angles (ANG1).

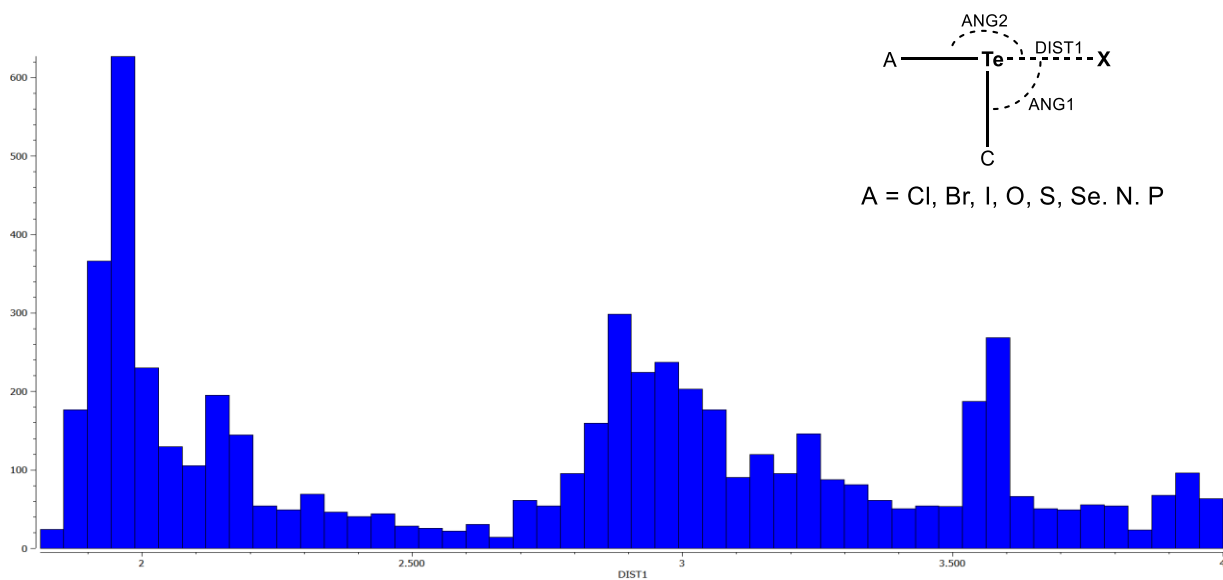

a

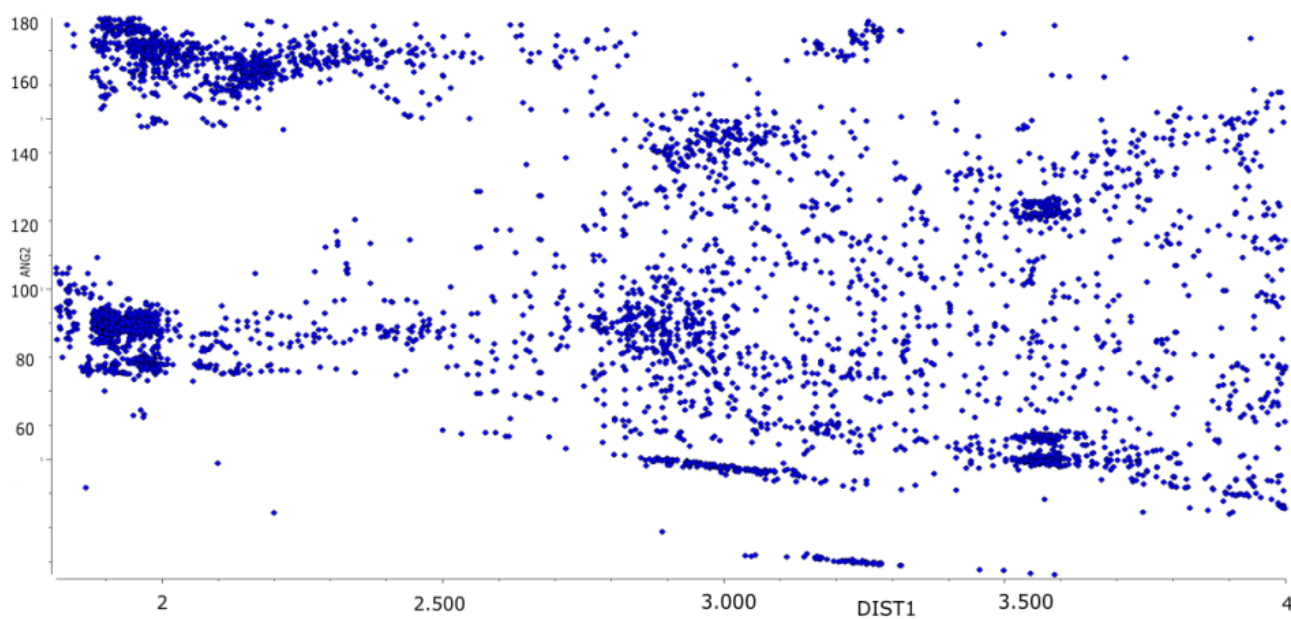

b

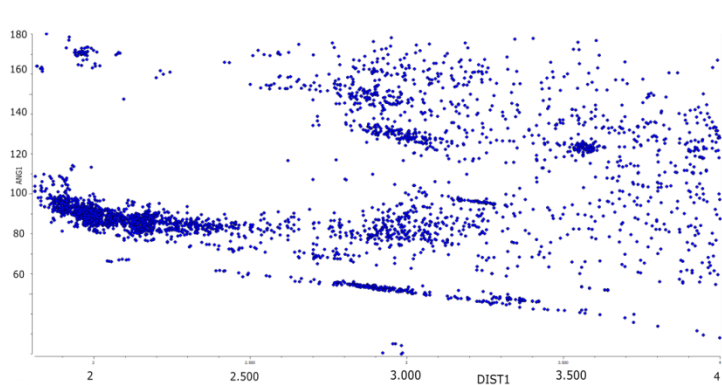

c

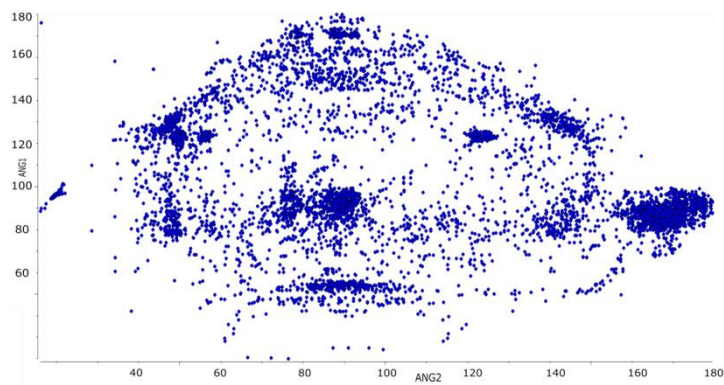

d

**Figure S5.** X = O, 576 entries: a) Te...O distance distribution; b) scattering of the Te...O distance (DIST1) with the and A-Te-O angles (ANG2); c) scattering of the Te...O distance (DIST1) with the and C-Te-O angles (ANG1); d) scattering of the C-Te-O angles (ANG1) with the C-Te-O angles (ANG1).

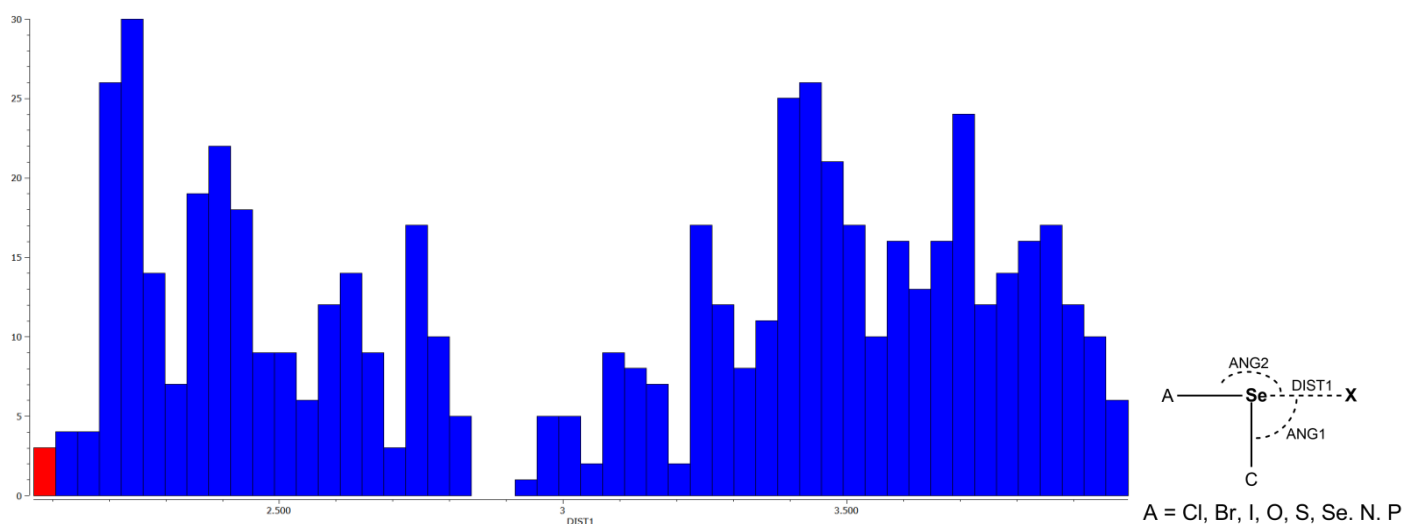

a

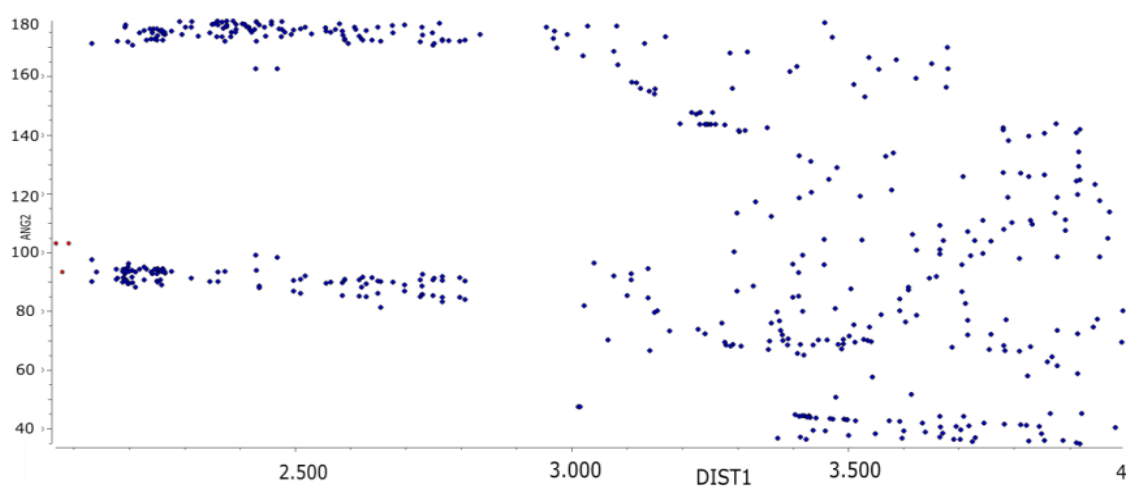

b

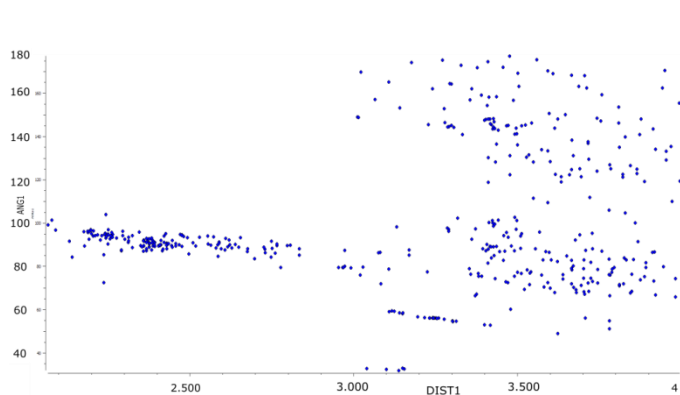

c

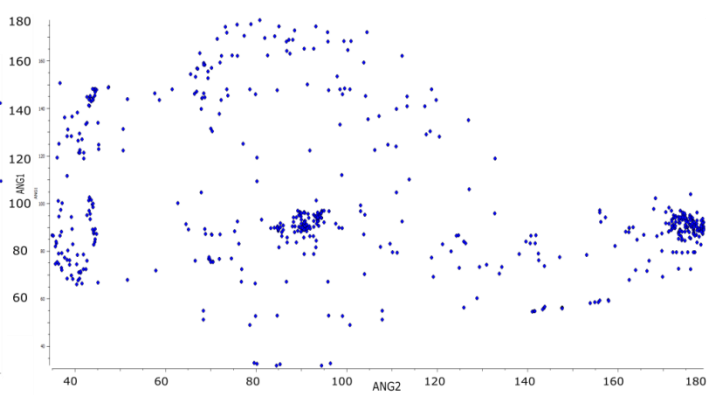

d

**Figure S6.** X = Cl, 140 entries: a) Se...Cl distance distribution; b) scattering of the Se...Cl distance (DIST1) with the and A-Se-Cl angles (ANG2); c) scattering of the Se...Cl distance (DIST1) with the and C-Se-Cl angles (ANG1); d) scattering of the C-Se-Cl angles (ANG1) with the C-Se-Cl angles (ANG2).

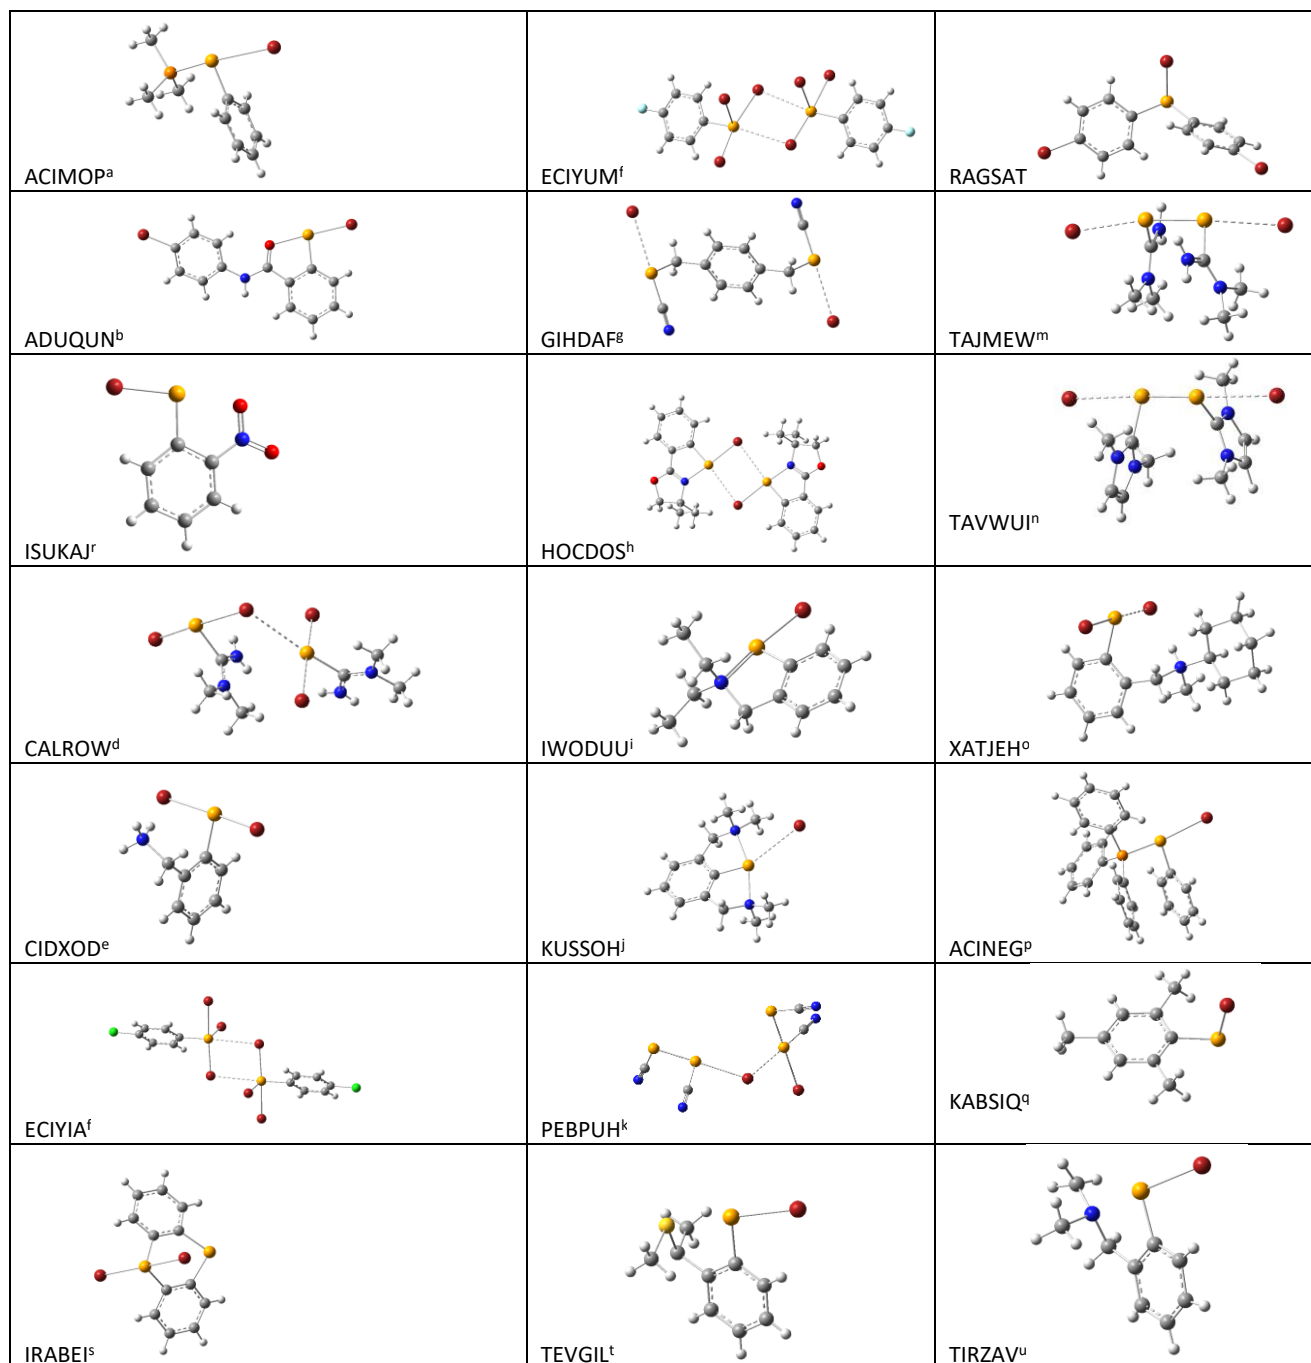

**Figure S7.** Refcodes and structures of the solid-state associations comprising Se...Br contacts which were chosen for the QTAIM analysis: a) Bromo(phenyl)(trimethylphosphino)selenane, b) (2-((4-bromophenyl)-carbonyl)phenyl)-bromo-selenium, c) bis(3-methylimidazolium-2-yl) diselenide dibromide d) N,N-Dimethylselenourea-dibromide, e) (R)-Dibromo-(2-(4-morpholinyl)phenyl)selenide, f) 1-Chloro-4-(tribromo- $\lambda^4$ -selanyl)benzene, g) tetrabutylammonium bromide (1,4-phenylene)bis(methylene) bis(selenocyanate), h) (2-(4,4-Dimethyl-2-oxazolonyl)phenyl)selanyl bromide, i) 1-bromo-2,2-diethyl-3H- $1\lambda^4,2\lambda^5$ -benzoselenazole, j) (2,6-bis(Dimethylaminomethyl)phenyl)selenium bromide, k) Phenyltrimethylammonium bromodiselenocyanate, l) bis(p-Bromophenyl)-bromo-selenide hexachloro-antimony, m) N1,N1,N3,N3-Tetramethyl- $\alpha,\alpha'$ -diselenobisformamidinium dibromide, n) Se,Se'-bis(1,3-Dimethyl-4-imidazolin-2-yl)diselenium dibromide, o) N-(2-(Bromoseleno)benzyl)-N-cyclohexyl-N-methylammonium bromide, p) Bromo(phenyl)-(triphenylphosphino)selenane, q) Bromo(mesityl)selenium; r) 2-Nitrobenzeneselenenyl bromide; s) 5,5-dibromoselenanthrene; t) 1-(Bromoselenyl)-2-(1-methylthioethyl)benzene; u) (2-(Dimethylaminomethyl)phenyl)-selenium(ii) bromide.



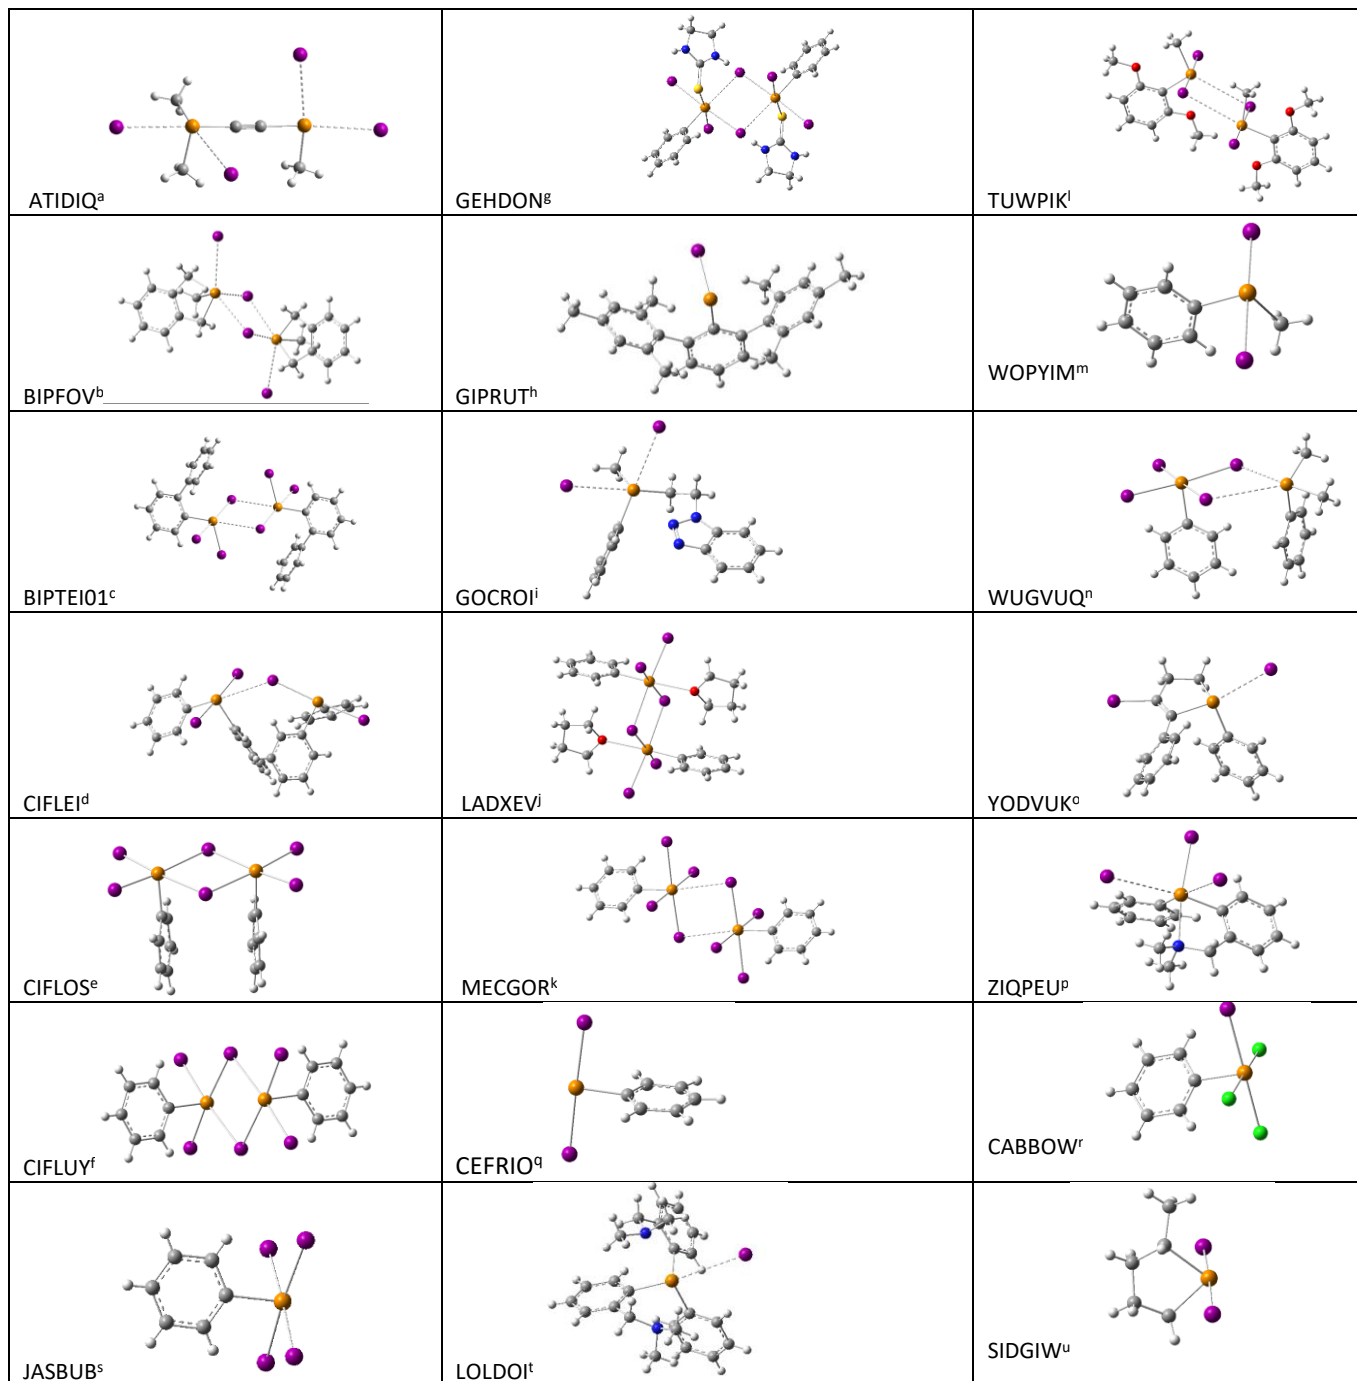

**Figure S8.** Refcodes and structures of the solid-state associations comprising Te...I contacts which were chosen for the QTAIM analysis: a) Dimethyl-((methyltelluro)ethynyl)telluronium iodide, b) 1-Trideuteromethyl-3,4-benzo-1-telluracyclopentane iodide, c) 2-Biphenyltellurium tri-iodide, d) Di-iodo-diphenyl-tellurium(iv), e) cis-bis(m2-Iodo)-tetraiodo-diphenyl-di-tellurium(iv), f) trans-bis(m2-Iodo)-tetraiodo-diphenyl-di-tellurium(iv), g) Tri-iodo-phenyl-(imidazolidine-2-thione)-tellurium(iv), h) (2,6-bis(2,4,6-trimethylphenyl)phenyl)tellurenyl iodide, i) [2-(1H-benzotriazol-1-yl)ethyl](methyl)phenyltellanium iodide, j) bis(m2-Iodo)-tetrakis(iodo)-diphenyl-bis(tetrahydrofuran)-di-tellurium, k) Phenyl-(thiourea-S)-selenium(ii) tetrakis(iodo)-phenyl-tellurium, l) Diiodo-methyl-(2,6-dimethoxyphenyl)-tellurium, m) diiodo-methyl-phenyl-tellurium, n) Dimethyl-phenyl-tellurium(iv) tetrakis(iodo)-phenyl-tellurium(iv), o) 4-iodo-1,5-diphenyl-2,3-dihydrotellurophenium iodide, p) (2-(Dimethylaminomethyl)phenyl)-iodo-phenyl-tellurium(iv) iodide ; q) Tetraphenylarsonium di-iodo-phenyl-tellurium(ii); r) Tetra-n-butylammonium trichloro-iodo-phenyl-tellurium; s) Tetraethylammonium tetraiodo-tellurium(iv); t) bis{2-[(dimethylamino)methyl]phenyl}(phenyl)tellanium iodide; u) 2-methyl-1,1-di-iodo-1-telluracyclopentane

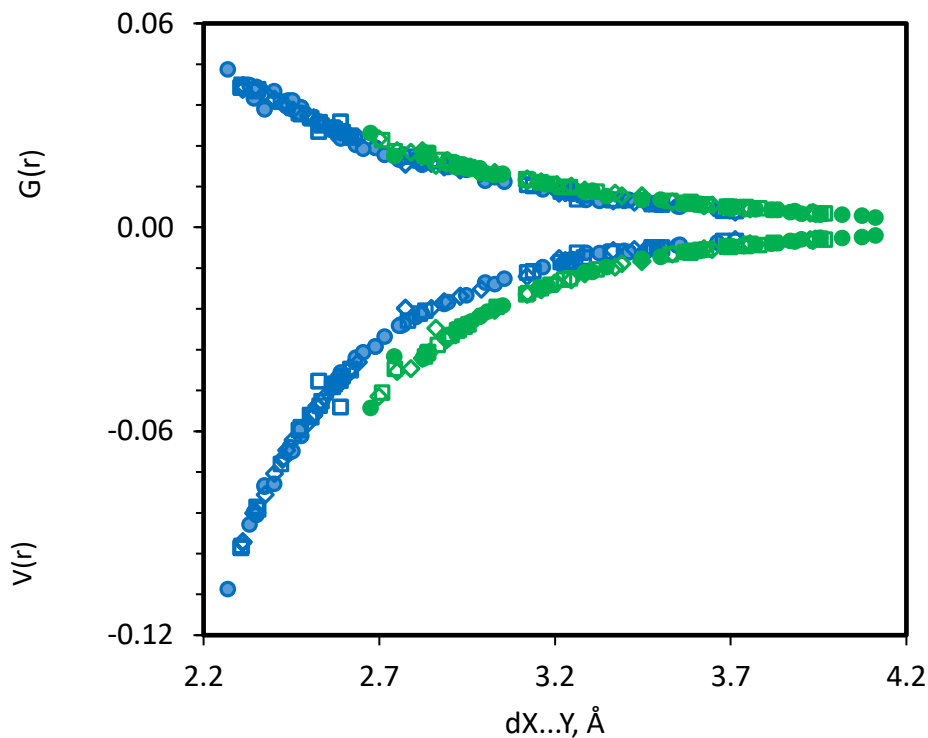

**Figure S9.** The dependencies of the kinetic ( $G(r)$ ) and potential ( $V(r)$ ) energy densities at BCPs on the Se...Br (blue) and Te...I (green) bond paths on the interatomic separations (legends are the same as in Figure 2).

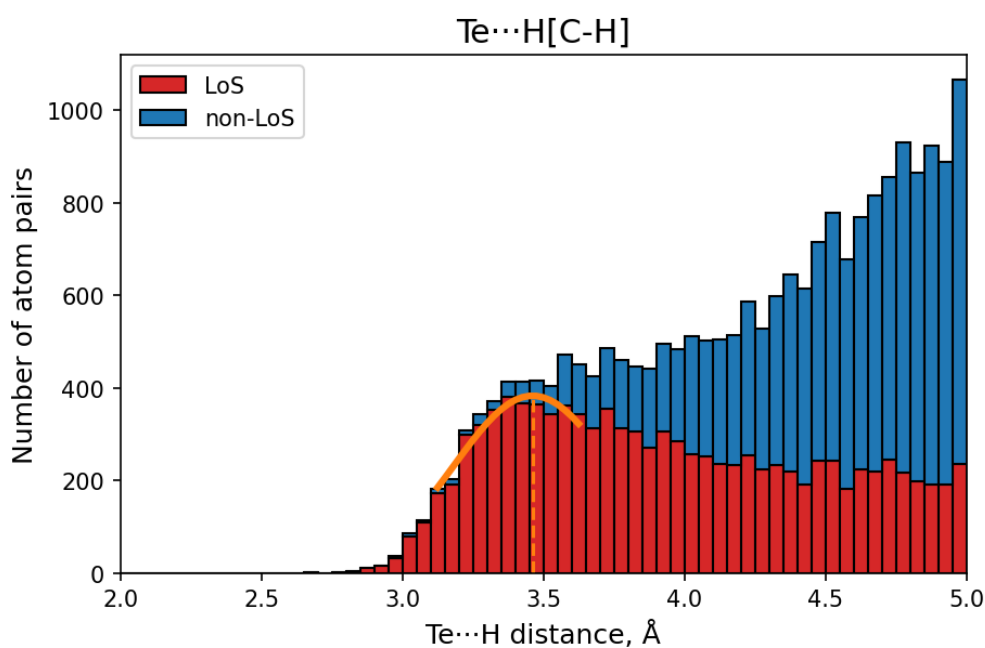

**Figure S10.** Distance distribution of all and line-of-sight C-H...Te contacts. Orange curve is a probability density function of the normal distribution, fitted to the histogram of distances of line-of-sight contacts, and the dotted orange line shows its maximum, which is treated as sum of van der Waals radii of the corresponding atoms.

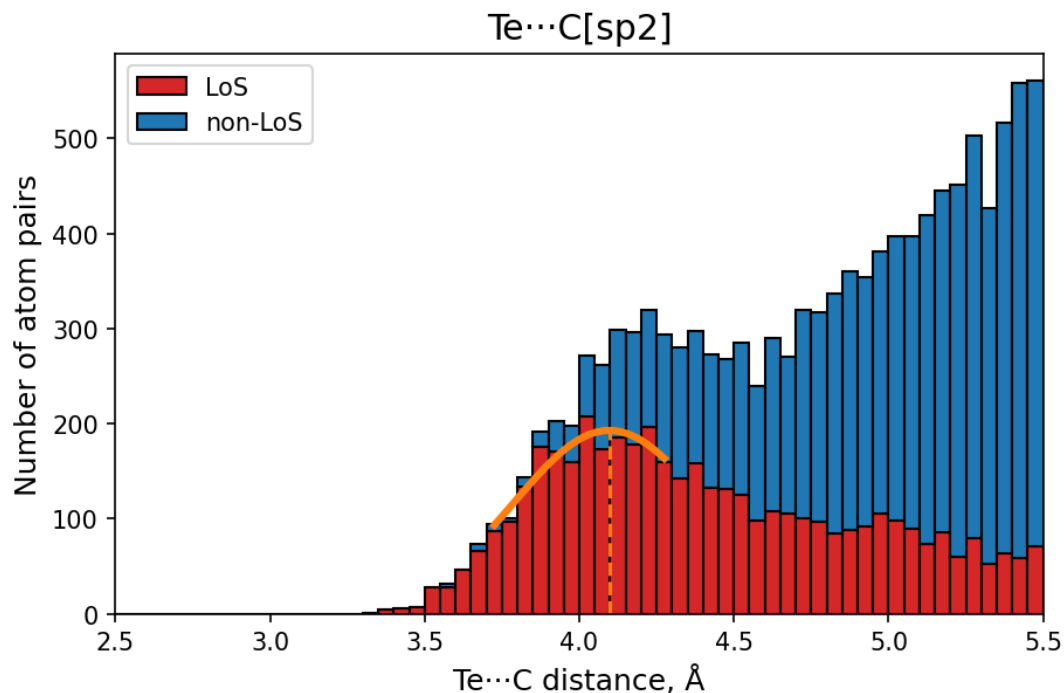

**Figure S11.** Distance distribution of all and line-of-sight  $C_{sp^2}\cdots Te$  contacts. Distance distribution of all and line-of-sight  $C-H\cdots Te$  contacts. Orange curve is a probability density function of the normal distribution, fitted to the histogram of distances of line-of-sight contacts, and the dotted orange line shows its maximum, which is treated as sum of van der Waals radii of the corresponding atoms.

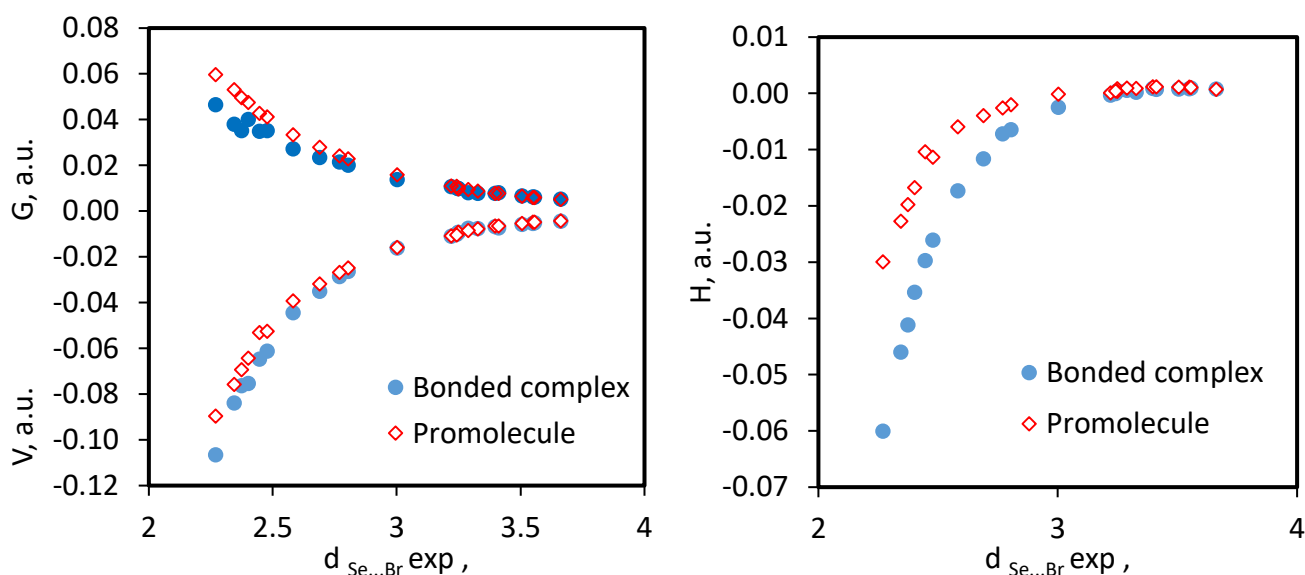

**Figure S12.** Variations of kinetic and potential energies (left) and energies (right) at BCP along Se-Br bonds in the experimental structures (bonded complexes) containing Se-Br contacts and in the corresponding promolecules constructed by the superposition of the non-interacting fragments extracted from these experimental structures.

**Table S1.** Experimental (solid-state) and calculated Se...Br distances ( $d_{\text{Se}\cdots\text{Br}}$ , in Å).<sup>a</sup>

| CSD Refcode         | $d_{\text{Se}\cdots\text{Br}}^{\text{exp}}$ | $d_{\text{Se}\cdots\text{Br}}^{\text{calc}}$ (vacuum) | $d_{\text{Se}\cdots\text{Br}}^{\text{calc}}$ (CH <sub>2</sub> Cl <sub>2</sub> ) |
|---------------------|---------------------------------------------|-------------------------------------------------------|---------------------------------------------------------------------------------|
| ACIMOP              | 3.327                                       | 2.573                                                 | 3.282                                                                           |
| ACINEG              | 3.002                                       | 2.522                                                 | 3.216                                                                           |
| ADUQUN              | 2.446                                       | 2.376                                                 | 2.420                                                                           |
| CALROW              | 3.397                                       | 3.427                                                 | 3.475                                                                           |
|                     | 2.762                                       | 2.641                                                 | 2.592                                                                           |
|                     | 2.441                                       | 2.534                                                 | 2.574                                                                           |
| CIDXOD              | 2.804                                       | 2.885                                                 | 2.816                                                                           |
|                     | 2.439                                       | 2.437                                                 | 2.477                                                                           |
| ECIYIA              | 3.411                                       | 3.468                                                 | 3.504                                                                           |
|                     | 2.344                                       | 2.311                                                 | 2.306                                                                           |
|                     | 2.478                                       | 2.513                                                 | 2.528                                                                           |
|                     | 2.689                                       | 2.584                                                 | 2.590                                                                           |
|                     | 2.948                                       | 2.780                                                 | 3.138                                                                           |
|                     | 3.029                                       | 2.780                                                 | 3.138                                                                           |
| ECIYUM              | 2.374                                       | 2.312                                                 | 2.307                                                                           |
|                     | 2.401                                       | 2.514                                                 | 2.507                                                                           |
|                     | 2.453                                       | 2.499                                                 | 2.531                                                                           |
|                     | 2.716                                       | 2.585                                                 | 2.619                                                                           |
|                     | 2.822                                       | 2.603                                                 | 2.590                                                                           |
|                     | 3.505                                       | 3.459                                                 | 3.481                                                                           |
|                     | 3.549                                       | 3.461                                                 | 3.491                                                                           |
|                     | 2.885                                       | 2.930                                                 | 3.121                                                                           |
|                     | 2.896                                       | 2.931                                                 | 3.123                                                                           |
| GIHDAF              | 3.249                                       | 3.230                                                 | 3.359                                                                           |
| HOCDOS              | 3.556                                       | 3.713                                                 | 3.679                                                                           |
|                     | 2.632                                       | 2.569                                                 | 2.782                                                                           |
| IWODUU              | 2.582                                       | 2.428                                                 | 2.574                                                                           |
| KUSSOH              | 3.662                                       | 3.212                                                 | 3.715                                                                           |
| PEBPUH              | 3.289                                       | 3.366                                                 | 3.364                                                                           |
|                     | 3.036                                       | 2.705                                                 | 2.739                                                                           |
| RAGSAT              | 2.269                                       | 2.313                                                 | 2.308                                                                           |
| TAJMEW              | 3.220                                       | 3.145                                                 | 3.235                                                                           |
|                     | 3.056                                       | 3.134                                                 | 3.234                                                                           |
| TAVWUI              | 3.242                                       | 3.121                                                 | 3.258                                                                           |
|                     | 3.166                                       | 2.991                                                 | 3.247                                                                           |
| XATJEH <sup>o</sup> | 2.475                                       | 2.455                                                 | 2.472                                                                           |
|                     | 2.769                                       | 2.849                                                 | 2.832                                                                           |
| KABSIQ              | 2.331                                       | 2.343                                                 | 2.351                                                                           |
| ISUKAJ              | 2.351                                       | 2.352                                                 | 2.356                                                                           |
| TEVGIL              | 2.591                                       | 2.402                                                 | 2.503                                                                           |
| TIRZAV              | 2.634                                       | 2.425                                                 | 2.566                                                                           |
| IRABEI              | 2.655                                       | 2.526                                                 | 2.536                                                                           |
|                     | 2.757                                       | 2.589                                                 | 2.618                                                                           |

a) See structures and names in Figure S7.

**Table S2.** Experimental and calculated Te...I distances ( $d_{\text{Te}\cdots\text{I}}$ , in Å).<sup>a</sup>

| CSD Refcode | $d_{\text{Se}\cdots\text{Br}}^{\text{exp}}$ | $d_{\text{Se}\cdots\text{Br}}^{\text{calc}}$ (vacuum) | $d_{\text{Se}\cdots\text{Br}}^{\text{calc}}$ (CH <sub>2</sub> Cl <sub>2</sub> ) |
|-------------|---------------------------------------------|-------------------------------------------------------|---------------------------------------------------------------------------------|
| ATIDIQ      | 3.447                                       | 3.201                                                 | 3.319                                                                           |
|             | 3.701                                       | 3.391                                                 | 3.529                                                                           |
| BIPFOV      | 3.688                                       | 3.624                                                 | 3.614                                                                           |
|             | 3.870                                       | 3.738                                                 | 3.690                                                                           |
|             | 4.112                                       | 3.625                                                 | 3.587                                                                           |
| BIPTEI01    | 3.028                                       | 2.862                                                 | 2.943                                                                           |
| CIFLEI      | 3.955                                       | 3.755                                                 | 3.756                                                                           |
| CIFLOS      | 3.179                                       | 3.161                                                 | 3.187                                                                           |
|             | 3.152                                       | 3.122                                                 | 3.124                                                                           |
| CIFLUY      | 3.285                                       | 3.161                                                 | 3.160                                                                           |
| GEHDON      | 3.883                                       | 3.934                                                 | 3.969                                                                           |
| GIPRUT      | 2.676                                       | 2.699                                                 | 2.708                                                                           |
| GOCROI      | 3.501                                       | 3.535                                                 | 3.597                                                                           |
|             | 3.570                                       | 3.285                                                 | 3.571                                                                           |
| LADXEV      | 2.743                                       | 2.751                                                 | 2.745                                                                           |
|             | 3.307                                       | 3.205                                                 | 3.244                                                                           |
|             | 3.052                                       | 3.121                                                 | 3.119                                                                           |
| MECGOR      | 2.961                                       | 2.891                                                 | 2.922                                                                           |
|             | 2.922                                       | 2.979                                                 | 2.937                                                                           |
|             | 3.834                                       | 3.926                                                 | 3.743                                                                           |
| TUWPIK      | 4.034                                       | 3.942                                                 | 4.190                                                                           |
|             | 4.018                                       | 3.942                                                 | 4.190                                                                           |
| WOPYIM      | 2.990                                       | 2.887                                                 | 2.906                                                                           |
| WUGVUQ      | 2.920                                       | 2.790                                                 | 2.844                                                                           |
|             | 2.986                                       | 2.790                                                 | 2.844                                                                           |
|             | 3.902                                       | 3.448                                                 | 3.630                                                                           |
|             | 4.074                                       | 3.448                                                 | 3.823                                                                           |
| YODVUK      | 3.347                                       | 3.029                                                 | 3.226                                                                           |
| ZIQPEU      | 3.816                                       | 3.648                                                 | 3.781                                                                           |
|             | 3.613                                       | 3.372                                                 | 3.585                                                                           |
|             | 2.825                                       | 2.843                                                 | 2.830                                                                           |
| CEFRI0      | 2.946                                       | 2.823                                                 | 2.837                                                                           |
|             | 2.963                                       | 2.823                                                 | 2.840                                                                           |
| CABBOW      | 2.837                                       | 2.958                                                 | 2.954                                                                           |
| JASBUB      | 2.925                                       | 2.924                                                 | 2.925                                                                           |
|             | 2.947                                       | 2.924                                                 | 2.927                                                                           |
| LOLDOI      | 3.772                                       | 3.247                                                 | 3.699                                                                           |
| SIDGIW      | 2.826                                       | 2.894                                                 | 2.900                                                                           |
|             | 3.008                                       | 2.898                                                 | 2.923                                                                           |

a) See structures and names in Figure S8.

**Table S3.** CSD refcodes, interatomic distances  $d_{x...y}$  (in Å) and characteristics of the BCPs along  $Te...I$  bonds in the experimental structures containing  $Te...I$  contacts: electron density,  $\rho(\mathbf{r})$ , the Laplacian of density,  $\nabla^2\rho(\mathbf{r})$ , kinetic,  $G(\mathbf{r})$ , and potential,  $V(\mathbf{r})$  energy densities, and energy density,  $H(\mathbf{r})$  (all in atomic units)

| CSD Refcode | $d_{x...y}$ | $\rho(\mathbf{r})$ | $G(\mathbf{r})$ | $V(\mathbf{r})$ | $H(\mathbf{r})$ | $\nabla^2\rho(\mathbf{r})$ |
|-------------|-------------|--------------------|-----------------|-----------------|-----------------|----------------------------|
| ATIDIQ      | 3.447       | 0.0203584656       | 0.0080807502    | -0.0093145726   | -0.0012338223   | 0.0273877207               |
|             | 3.701       | 0.0134069855       | 0.0055169868    | -0.0054636865   | 0.0000533004    | 0.0222811494               |
| BIPFOV      | 3.688       | 0.0130151632       | 0.0056809606    | -0.0055226423   | 0.0001583183    | 0.0233571160               |
|             | 3.87        | 0.0097715638       | 0.0044643587    | -0.0040144533   | 0.0004499054    | 0.0196570566               |
|             | 4.112       | 0.0065670845       | 0.0028914056    | -0.0024301808   | 0.0004612247    | 0.0134105212               |
| BIPTEIO     | 3.028       | 0.0439280471       | 0.0156126109    | -0.0240217407   | -0.0084091297   | 0.0288141058               |
| CIFLEI      | 3.955       | 0.0076842734       | 0.0037163859    | -0.0030997076   | 0.0006166783    | 0.0173322569               |
| CIFLOS      | 3.179       | 0.0336850209       | 0.0127668982    | -0.0172670310   | -0.0045001327   | 0.0330671124               |
|             | 3.152       | 0.0349513294       | 0.0133258550    | -0.0182559449   | -0.0049300898   | 0.0335831264               |
| CIFLUY      | 3.285       | 0.0283424288       | 0.0103968003    | -0.0132576853   | -0.0028608850   | 0.0301436808               |
| GEHDON      | 3.883       | 0.0095024501       | 0.0047555799    | -0.0042211861   | 0.0005343938    | 0.0211598946               |
| GIPRUT      | 2.676       | 0.0729688864       | 0.0277550575    | -0.0531248354   | -0.0253697780   | 0.0095446916               |
| GOCROI      | 3.501       | 0.0185631785       | 0.0081854701    | -0.0087527661   | -0.0005672960   | 0.0304726992               |
|             | 3.57        | 0.0164776048       | 0.0068578997    | -0.0072202473   | -0.0003623475   | 0.0259822108               |
| LADXEV      | 2.743       | 0.0608806637       | 0.0209329587    | -0.0380004035   | -0.0170674448   | 0.0154629122               |
|             | 3.307       | 0.0267195388       | 0.0108023375    | -0.0130959483   | -0.0022936108   | 0.0340349202               |
|             | 3.052       | 0.0414276278       | 0.0157367069    | -0.0230285200   | -0.0072918130   | 0.0337797216               |
| MECGOR      | 2.922       | 0.0517907070       | 0.0186112872    | -0.0307500190   | -0.0121387318   | 0.0258906827               |
|             | 2.961       | 0.0489191244       | 0.0171808275    | -0.0278688973   | -0.0106880698   | 0.0259713619               |
|             | 3.834       | 0.0102948189       | 0.0051689094    | -0.0046201783   | 0.0005487311    | 0.0228705619               |
| TUWPIK      | 4.018       | 0.0076532317       | 0.0037157073    | -0.0031634532   | 0.0005522542    | 0.0170718459               |
| WOPYIM      | 2.99        | 0.0466567559       | 0.0159890756    | -0.0258973257   | -0.0099082500   | 0.0243235972               |
| WUGVUQ      | 2.92        | 0.0527571089       | 0.0176103085    | -0.0301231700   | -0.0125128615   | 0.0203902028               |
|             | 2.986       | 0.0454377487       | 0.0173330006    | -0.0263065222   | -0.0089735216   | 0.0334381754               |
|             | 3.902       | 0.0088151024       | 0.0039862738    | -0.0035186203   | 0.0004676535    | 0.0178157092               |
|             | 4.074       | 0.0073634916       | 0.0034062997    | -0.0028681959   | 0.0005381038    | 0.0157776137               |
| YODVUK      | 3.347       | 0.0261552485       | 0.0091355806    | -0.0117120472   | -0.0025764666   | 0.0262364712               |
| ZIQPEU      | 3.613       | 0.0152774847       | 0.0065064727    | -0.0065627680   | -0.0000562952   | 0.0265061226               |
|             | 3.816       | 0.0118550005       | 0.0051232835    | -0.0048204680   | 0.0003028156    | 0.0217043966               |
|             | 2.825       | 0.0608876627       | 0.0207914688    | -0.0383377426   | -0.0175462738   | 0.0129818430               |
| CEFRIO      | 2.946       | 0.0491510274       | 0.0180658844    | -0.0289240231   | -0.0108581387   | 0.0288313804               |
|             | 2.963       | 0.0477840028       | 0.0174940075    | -0.0277183254   | -0.0102243179   | 0.0290791051               |
| CABBOW      | 2.837       | 0.0590195862       | 0.0216044942    | -0.0378459688   | -0.0162414746   | 0.0214530195               |
| JASBUB      | 2.925       | 0.0515184492       | 0.0180709432    | -0.0300093892   | -0.0119384461   | 0.0245304186               |
|             | 2.947       | 0.0496943800       | 0.0173637964    | -0.0283630570   | -0.0109992607   | 0.0254584930               |
| LOLDOI      | 3.772       | 0.0124840206       | 0.0053049438    | -0.0051055406   | 0.0001994033    | 0.0220173887               |
| SIDGIW      | 2.826       | 0.0593025147       | 0.0221363218    | -0.0386868140   | -0.0165504922   | 0.0223444536               |
|             | 3.008       | 0.0449499249       | 0.0157339048    | -0.0248552945   | -0.0091213896   | 0.0264503231               |

**Table S4.** CSD refcodes, interatomic distances  $d_{x...y}$  (in Å) and characteristics of the BCPs along  $Te...I$  bonds in the optimized in vacuum structures containing  $Te...I$  contacts: electron density,  $\rho(r)$ , the Laplacian of density,  $\nabla^2\rho(r)$ , kinetic,  $G(r)$ , and potential,  $V(r)$  energy densities, and energy density,  $H(r)$  (all in atomic units)

| CSD Refcode | $d_{x...y}$ | $\rho(r)$    | $G(r)$       | $V(r)$        | $H(r)$        | $\nabla^2\rho(r)$ |
|-------------|-------------|--------------|--------------|---------------|---------------|-------------------|
| ATIDIQ      | 3.20053     | 0.0309176369 | 0.0123205362 | -0.0163004245 | -0.0039798883 | 0.0333626578      |
|             | 3.39107     | 0.0222595254 | 0.0092790910 | -0.0106811194 | -0.0014020285 | 0.0315082599      |
| BIPFOV      | 3.62402     | 0.0142052614 | 0.0063827545 | -0.0063601884 | 0.0000225661  | 0.0256212840      |
|             | 3.7377      | 0.0115213110 | 0.0055611722 | -0.0051892679 | 0.0003719044  | 0.0237323068      |
|             | 3.62462     | 0.0142200782 | 0.0063908372 | -0.0063695975 | 0.0000212397  | 0.0256483089      |
| BIPTEIO     | 2.86176     | 0.0503310218 | 0.0182438181 | -0.0296768082 | -0.0114329901 | 0.0272437041      |
| CIFLEI      | 3.75478     | 0.0108123622 | 0.0053763551 | -0.0048241790 | 0.0005521761  | 0.0237141247      |
| CIFLOS      | 3.16136     | 0.0344210441 | 0.0133154662 | -0.0180171106 | -0.0047016444 | 0.0344553452      |
|             | 3.12245     | 0.0366555492 | 0.0140101871 | -0.0195654839 | -0.0055552968 | 0.0338196482      |
| CIFLUY      | 3.16094     | 0.0352927622 | 0.0133610535 | -0.0184450450 | -0.0050839915 | 0.0331083115      |
| GEHDON      | 3.93443     | 0.0088468356 | 0.0043994927 | -0.0038687419 | 0.0005307508  | 0.0197209741      |
| GIPRUT      | 2.69911     | 0.0707583729 | 0.0259999766 | -0.0497452144 | -0.0237452378 | 0.0090218842      |
| GOCROI      | 3.28475     | 0.0270568226 | 0.0110079254 | -0.0136887530 | -0.0026808277 | 0.0333084171      |
|             | 3.53463     | 0.0169473917 | 0.0075009733 | -0.0078901673 | -0.0003891940 | 0.0284471202      |
| LADXEV      | 2.75109     | 0.0654580853 | 0.0225503376 | -0.0424652707 | -0.0199149331 | 0.0105428280      |
|             | 3.20542     | 0.0318524429 | 0.0125523381 | -0.0164003271 | -0.0038479890 | 0.0348174340      |
|             | 3.12144     | 0.0368739307 | 0.0142206016 | -0.0197373704 | -0.0055167689 | 0.0348154084      |
| MECGOR      | 2.89091     | 0.0547200762 | 0.0188600869 | -0.0324294142 | -0.0135693273 | 0.0211635834      |
|             | 2.97875     | 0.0470190061 | 0.0167763306 | -0.0265052742 | -0.0097289436 | 0.0281898246      |
|             | 3.92626     | 0.0084521070 | 0.0041985332 | -0.0035934387 | 0.0006050945  | 0.0192145107      |
| TUWPIK      | 3.94187     | 0.0078662694 | 0.0040293645 | -0.0034103423 | 0.0006190223  | 0.0185935474      |
| WOPYIM      | 2.89167     | 0.0540386376 | 0.0195178944 | -0.0331274414 | -0.0136095470 | 0.0236340465      |
| WUGVUQ      | 2.79031     | 0.0647714447 | 0.0220584166 | -0.0415524578 | -0.0194940412 | 0.0102586725      |
|             | 3.12172     | 0.0367148300 | 0.0137835953 | -0.0193117603 | -0.0055281650 | 0.0330218037      |
|             | 3.44767     | 0.0203153758 | 0.0092267851 | -0.0100433846 | -0.0008165995 | 0.0336407468      |
|             | 3.44835     | 0.0202913916 | 0.0092162855 | -0.0100284056 | -0.0008121202 | 0.0336166653      |
| YODVUK      | 3.02898     | 0.0428353773 | 0.0161367617 | -0.0244578758 | -0.0083211141 | 0.0312628280      |
| ZIQPEU      | 3.64802     | 0.0152774847 | 0.0065064727 | -0.0065627680 | -0.0000562952 | 0.0258007107      |
|             | 3.37193     | 0.0239642296 | 0.0099985199 | -0.0116910604 | -0.0016925406 | 0.0332239260      |
|             | 2.84344     | 0.0586263024 | 0.0205698523 | -0.0367630184 | -0.0161931661 | 0.0175076761      |
| CEFRIO      | 2.823       | 0.0589818701 | 0.0225047033 | -0.0385298259 | -0.0160251226 | 0.0259192870      |
| CABBOW      | 2.958       | 0.0486329812 | 0.0174626738 | -0.0281819817 | -0.0107193080 | 0.0269738210      |
| JASBUB      | 2.924       | 0.0515876886 | 0.0182801628 | -0.0302394054 | -0.0119592425 | 0.0252841135      |
| LOLDOI      | 3.247       | 0.0296075433 | 0.0121396489 | -0.0154608736 | -0.0033212247 | 0.0352737279      |
| SIDGIW      | 2.894       | 0.0533386434 | 0.0196119042 | -0.0328508435 | -0.0132389393 | 0.0254925409      |
|             | 2.898       | 0.0530437972 | 0.0194128033 | -0.0325435878 | -0.0131307845 | 0.0251287411      |

**Table S5.** CSD refcodes, interatomic distances  $d_{x...y}$  (in Å) and characteristics of the BCPs along  $Te...I$  bonds in the optimized in  $CH_2Cl_2$  structures containing  $Te...I$  contacts: electron density,  $\rho(\mathbf{r})$ , the Laplacian of density,  $\nabla^2\rho(\mathbf{r})$ , kinetic,  $G(\mathbf{r})$ , and potential,  $V(\mathbf{r})$  energy densities, and energy density,  $H(\mathbf{r})$  (all in atomic units)

| CSD Refcode | $d_{x...y}$ | $\rho(\mathbf{r})$ | $G(\mathbf{r})$ | $V(\mathbf{r})$ | $H(\mathbf{r})$ | $\nabla^2\rho(\mathbf{r})$ |
|-------------|-------------|--------------------|-----------------|-----------------|-----------------|----------------------------|
| ATIDIQ      | 3.319       | 0.0242860741       | 0.0104945639    | -0.0124114931   | -0.0019169293   | 0.0343105608               |
|             | 3.529       | 0.0168297258       | 0.0077599772    | -0.0079755322   | -0.0002155550   | 0.0301776910               |
| BIPFOV      | 3.614       | 0.0141988588       | 0.0067438916    | -0.0065955804   | 0.0001483112    | 0.0275688120               |
|             | 3.690       | 0.0123619595       | 0.0060801422    | -0.0057305670   | 0.0003495753    | 0.0257188705               |
|             | 3.587       | 0.0149264830       | 0.0070821848    | -0.0070052138   | 0.0000769710    | 0.0286366244               |
| BIPTEIO     | 2.943       | 0.0498262326       | 0.0180003744    | -0.0292045381   | -0.0112041637   | 0.0271852330               |
| CIFLEI      | 3.756       | 0.0108230568       | 0.0054172524    | -0.0048611782   | 0.0005560742    | 0.0238933065               |
| CIFLOS      | 3.187       | 0.0327718003       | 0.0127805166    | -0.0169089215   | -0.0041284049   | 0.0346084921               |
|             | 3.124       | 0.0364242081       | 0.0139216807    | -0.0193734695   | -0.0054517888   | 0.0338796535               |
| CIFLUY      | 3.160       | 0.0343405752       | 0.0132385349    | -0.0179159986   | -0.0046774636   | 0.0342443459               |
| GEHDON      | 3.969       | 0.0083441291       | 0.0041387061    | -0.0035990999   | 0.0005396063    | 0.0187132495               |
| GIPRUT      | 2.708       | 0.0695821948       | 0.0256738827    | -0.0486645773   | -0.0229906946   | 0.0107356306               |
| GOCROI      | 3.597       | 0.0146624815       | 0.0069493854    | -0.0068916000   | 0.0000577854    | 0.0280286848               |
|             | 3.571       | 0.0154330606       | 0.0072487237    | -0.0072592980   | -0.0000105743   | 0.0289525992               |
| LADXEV      | 2.745       | 0.0645522589       | 0.0223240996    | -0.0416996652   | -0.0193755657   | 0.0117952975               |
|             | 3.244       | 0.0296581255       | 0.0118259101    | -0.0149949247   | -0.0031690145   | 0.0346276092               |
|             | 3.119       | 0.0370147371       | 0.0142065210    | -0.0197495620   | -0.0055430410   | 0.0346539990               |
| MECGOR      | 2.937       | 0.0503968621       | 0.0179123089    | -0.0292742797   | -0.0113619708   | 0.0262017376               |
|             | 2.922       | 0.0516991445       | 0.0183189533    | -0.0303470141   | -0.0120280608   | 0.0251640077               |
|             | 3.743       | 0.0118935282       | 0.0059824201    | -0.0054828869   | 0.0004995332    | 0.0259278135               |
| TUWPIK      | 3.956       | 0.0078514102       | 0.0039538157    | -0.0033700187   | 0.0005837969    | 0.0181504505               |
| WOPYIM      | 2.906       | 0.0524130289       | 0.0188540324    | -0.0316521004   | -0.0127980680   | 0.0242244750               |
| WUGVUQ      | 2.867       | 0.0568947831       | 0.0197918811    | -0.0346271472   | -0.0148352661   | 0.0198271430               |
|             | 3.034       | 0.0425023665       | 0.0156274093    | -0.0233865554   | -0.0077591461   | 0.0314732286               |
|             | 3.630       | 0.0138931927       | 0.0067241363    | -0.0065017206   | 0.0002224157    | 0.0277862086               |
|             | 3.823       | 0.0104381762       | 0.0050883959    | -0.0045783971   | 0.0005099988    | 0.0223935791               |
| YODVUK      | 3.226       | 0.0297764608       | 0.0119074237    | -0.0153716025   | -0.0034641788   | 0.0337730244               |
| ZIQPEU      | 3.781       | 0.0119902092       | 0.0055985450    | -0.0052239032   | 0.0003746418    | 0.0238927472               |
|             | 3.585       | 0.0159612464       | 0.0074649439    | -0.0074513788   | 0.0000135651    | 0.0299140369               |
|             | 2.830       | 0.0596758863       | 0.0210855760    | -0.0379612065   | -0.0168756306   | 0.0168408717               |
| CEFRIO      | 2.837       | 0.0576224532       | 0.0218586334    | -0.0370666466   | -0.0152080132   | 0.0266033520               |
|             | 2.840       | 0.05712369         | 0.0217263190    | -0.0367103849   | -0.0149840659   | 0.0269698942               |
| CABBOW      | 2.954       | 0.0489427013       | 0.0176965432    | -0.0285974567   | -0.0109009135   | 0.0271828965               |
| JASBUB      | 2.925       | 0.0514134290       | 0.0182520772    | -0.0301550051   | -0.0119029279   | 0.0253970320               |
|             | 2.927       | 0.0513240017       | 0.0182304711    | -0.0300765845   | -0.0118461134   | 0.0255378581               |
| LOLDOI      | 3.699       | 0.0128706312       | 0.0060937933    | -0.0057929771   | 0.0003008161    | 0.0255784381               |
| SIGDIW      | 2.900       | 0.0523217696       | 0.0191918026    | -0.0319281348   | -0.0127363322   | 0.0258225515               |



**Table S6.** CSD refcodes, interatomic distances Se...Br distances  $d_{x...y}$ (in Å) and characteristics of the BCPs along Se...Br bonds in the experimental structures containing Se...Br contacts (all in atomic units)

| CSD Refcode | $d_{x...y}$ | $\rho(r)$    | $G(r)$       | $V(r)$        | $H(r)$        | $\nabla^2\rho(r)$ |
|-------------|-------------|--------------|--------------|---------------|---------------|-------------------|
| ACIMOP      | 3.327       | 0.0168335958 | 0.0077909585 | -0.0076162090 | 0.0001747495  | 0.0318628322      |
| ACINEG      | 3.002       | 0.0306251284 | 0.0137393510 | -0.0162149070 | -0.0024755560 | 0.0450551801      |
| ADUQUN      | 2.446       | 0.0829467828 | 0.0349364559 | -0.0646650715 | -0.0297286156 | 0.0208313611      |
| CALROW      | 2.441       | 0.0825917844 | 0.0373409729 | -0.0664747948 | -0.0291338219 | 0.0328286041      |
|             | 2.762       | 0.0467590387 | 0.0206054463 | -0.0285929490 | -0.0079875026 | 0.0504717747      |
|             | 3.397       | 0.0130595544 | 0.0077286535 | -0.0068767937 | 0.0008518598  | 0.0343220531      |
|             | 2.762       | 0.0466114347 | 0.0210227583 | -0.0289245746 | -0.0079018162 | 0.0524837685      |
|             | 2.441       | 0.0830037803 | 0.0369110045 | -0.0661760283 | -0.0292650239 | 0.0305839224      |
| CIDXOD      | 2.804       | 0.0423381016 | 0.0200004358 | -0.0264478784 | -0.0064474426 | 0.0542119727      |
|             | 2.439       | 0.0827242142 | 0.0365856477 | -0.0660652145 | -0.0294795668 | 0.0284243235      |
| ECIYIA2     | 3.411       | 0.0132480928 | 0.0080242176 | -0.0073152337 | 0.0007089839  | 0.0349328060      |
|             | 3.411       | 0.0132480628 | 0.0080241413 | -0.0073151460 | 0.0007089953  | 0.0349325465      |
|             | 2.344       | 0.1056365102 | 0.0379567199 | -0.0839575155 | -0.0460007957 | -0.0321763032     |
|             | 2.344       | 0.1056481690 | 0.0379631265 | -0.0839752184 | -0.0460120920 | -0.0321958620     |
|             | 2.478       | 0.0809714810 | 0.0352166049 | -0.0613051322 | -0.0260885274 | 0.0365123099      |
|             | 2.478       | 0.0809714165 | 0.0352169170 | -0.0613055949 | -0.0260886779 | 0.0365129562      |
|             | 2.689       | 0.0566767801 | 0.0234172484 | -0.0350441594 | -0.0116269110 | 0.0471613495      |
|             | 2.689       | 0.0566832036 | 0.0234208746 | -0.0350507322 | -0.0116298576 | 0.0471640680      |
| ECIYUM2     | 2.374       | 0.1004561637 | 0.0351293008 | -0.0762998619 | -0.0411705612 | -0.0241650416     |
|             | 2.374       | 0.1006925033 | 0.0347026243 | -0.0759841804 | -0.0412815560 | -0.0263157268     |
|             | 2.401       | 0.0930104491 | 0.0400815184 | -0.0754344294 | -0.0353529110 | 0.0189144295      |
|             | 2.716       | 0.0547937123 | 0.0212906531 | -0.0321713312 | -0.0108806782 | 0.0416398997      |
|             | 2.822       | 0.0454767444 | 0.0183878168 | -0.0255029109 | -0.0071150941 | 0.0450908908      |
|             | 2.453       | 0.0841268027 | 0.0373018284 | -0.0658268752 | -0.0285250468 | 0.0351071263      |
|             | 3.5494      | 0.0105351212 | 0.0062027775 | -0.0054067023 | 0.0007960752  | 0.0279954110      |
|             | 3.5055      | 0.0113859160 | 0.0066358776 | -0.0058878888 | 0.0007479888  | 0.0295354655      |
| GIHDAF      | 3.249       | 0.0170555672 | 0.0098119109 | -0.0093830397 | 0.0004288712  | 0.0409631287      |
|             | 3.249       | 0.0170585581 | 0.0098132952 | -0.0093847925 | 0.0004285027  | 0.0409671914      |
| HOCDOS      | 3.556       | 0.0102150354 | 0.0060731429 | -0.0051638944 | 0.0009092484  | 0.0279295653      |
|             | 2.632       | 0.0577929145 | 0.0262587185 | -0.0396518830 | -0.0133931645 | 0.0514622159      |
| IWODUU      | 2.582       | 0.0648975383 | 0.0271326029 | -0.0444473497 | -0.0173147468 | 0.0392714244      |
| KUSSOH      | 3.662       | 0.0095881693 | 0.0051774214 | -0.0044377514 | 0.0007396700  | 0.0236683656      |
| PEBPUH      | 3.289       | 0.0163235060 | 0.0080161828 | -0.0074694952 | 0.0005466876  | 0.0342514819      |
| RAGSAT      | 2.269       | 0.1186880707 | 0.0464580811 | -0.1064984120 | -0.0600403308 | -0.0543289987     |
| TAJMEW      | 3.22        | 0.0210270621 | 0.0106357608 | -0.0109812772 | -0.0003455164 | 0.0411609776      |
|             | 3.056       | 0.0279170933 | 0.0133836202 | -0.0151548312 | -0.0017712110 | 0.0464496366      |
| TAVWUI      | 3.242       | 0.0196183827 | 0.0101520848 | -0.0101868316 | -0.0000347468 | 0.0404693520      |
|             | 3.166       | 0.0225888100 | 0.0111576474 | -0.0117541646 | -0.0005965172 | 0.0422445207      |
| XATJEH      | 2.475       | 0.0777793734 | 0.0336701867 | -0.0594576228 | -0.0257874361 | 0.0315310024      |
|             | 2.769       | 0.0445190765 | 0.0213859338 | -0.0286030935 | -0.0072171597 | 0.0566750966      |
| KABSIQ      | 2.331       | 0.1015754352 | 0.0418477979 | -0.0874247656 | -0.0455769677 | -0.0149166794     |
| ISUKAJ      | 2.351       | 0.0992926198 | 0.0413203812 | -0.0845854174 | -0.0432650362 | -0.0077786202     |
| TEVGIL      | 2.591       | 0.0646538249 | 0.0261226420 | -0.0427099893 | -0.0165873473 | 0.0381411787      |
| TIRZAV      | 2.634       | 0.0594288807 | 0.0242509595 | -0.0383890531 | -0.0141380936 | 0.0404514634      |
| IRABEI      | 2.655       | 0.0597338001 | 0.0231543958 | -0.0367718535 | -0.0136174576 | 0.0381477528      |
| KABSIQ      | 2.757       | 0.0506369122 | 0.0198697323 | -0.0289933247 | -0.0091235924 | 0.0429845597      |
|             | 2.331       | 0.1015754352 | 0.0418477979 | -0.0874247656 | -0.0455769677 | -0.0149166794     |

**Table S7.** CSD refcodes, interatomic distances Se...Br distances  $d_{x...y}$  (in Å) and characteristics of the BCPs along Se...Br bonds in the optimized in vacuum structures (all in atomic units)

| CSD Refcode | $d_{x...y}$ | $\rho(r)$    | $G(r)$       | $V(r)$        | $H(r)$        | $\nabla^2\rho(r)$ |
|-------------|-------------|--------------|--------------|---------------|---------------|-------------------|
| ACIMOP      | 2.573       | 0.0654976690 | 0.0289831915 | -0.0464186560 | -0.0174354646 | 0.0461909077      |
| ACINEG      | 2.522       | 0.0717912410 | 0.0311841679 | -0.0525440168 | -0.0213598489 | 0.0392972762      |
| ADUQUN      | 2.376       | 0.0943749531 | 0.0395123227 | -0.0786296597 | -0.0391173371 | 0.0015799424      |
| CALROW      | 2.761       | 0.0688178480 | 0.0302529597 | -0.0499647461 | -0.0197117864 | 0.0421646934      |
|             | 2.427       | 0.0604440117 | 0.0272458356 | -0.0420934467 | -0.0148476111 | 0.0495928981      |
|             | 2.821       | 0.0123820984 | 0.0074147672 | -0.0065246454 | 0.0008901218  | 0.0332195560      |
|             | 2.545       | 0.0706186437 | 0.0307671147 | -0.0513606536 | -0.0205935389 | 0.0406943031      |
|             | 2.614       | 0.0580863227 | 0.0262928849 | -0.0396441332 | -0.0133512483 | 0.0517665461      |
| CIDXOD      | 3.427       | 0.0358069101 | 0.0177631733 | -0.0218698504 | -0.0041066771 | 0.0546259849      |
|             | 2.534       | 0.0836350030 | 0.0354082050 | -0.0656272591 | -0.0302190541 | 0.0207566034      |
| ECIYIA2     | 2.641       | 0.0121626624 | 0.0071913254 | -0.0064602373 | 0.0007310882  | 0.0316896545      |
|             | 2.885       | 0.0121623084 | 0.0071910954 | -0.0064599888 | 0.0007311066  | 0.0316888080      |
|             | 2.437       | 0.1118118766 | 0.0407264228 | -0.0927985873 | -0.0520721644 | -0.0453829663     |
|             | 3.468       | 0.1118122108 | 0.0407262788 | -0.0927987439 | -0.0520724651 | -0.0453847451     |
|             | 3.468       | 0.0766714444 | 0.0321607603 | -0.0553647223 | -0.0232039620 | 0.0358271932      |
|             | 2.311       | 0.0766692856 | 0.0321594318 | -0.0553619547 | -0.0232025229 | 0.0358276355      |
|             | 2.311       | 0.0673720564 | 0.0286974781 | -0.0462374931 | -0.0175400150 | 0.0446298524      |
|             | 2.513       | 0.0673721316 | 0.0286972227 | -0.0462373237 | -0.0175401010 | 0.0446284865      |
| ECIYUM2     | 2.513       | 0.1116521090 | 0.0406867274 | -0.0926335801 | -0.0519468527 | -0.0450405013     |
|             | 2.584       | 0.1116168203 | 0.0406420789 | -0.0925590595 | -0.0519169806 | -0.0450996069     |
|             | 2.584       | 0.0765610191 | 0.0321213101 | -0.0552527752 | -0.0231314651 | 0.0359593799      |
|             | 2.312       | 0.0787767372 | 0.0327830490 | -0.0574779973 | -0.0246949483 | 0.0323524027      |
|             | 2.312       | 0.0672286864 | 0.0286366689 | -0.0460852955 | -0.0174486266 | 0.0447521692      |
|             | 2.514       | 0.0650570285 | 0.0278928497 | -0.0440634127 | -0.0161705630 | 0.0468891470      |
|             | 2.499       | 0.0123482563 | 0.0073185276 | -0.0065874373 | 0.0007310903  | 0.0321984713      |
|             | 2.585       | 0.0122676190 | 0.0072762618 | -0.0065363684 | 0.0007398933  | 0.0320646203      |
| GIHDAF      | 2.603       | 0.0176619736 | 0.0101698705 | -0.0098087909 | 0.0003610796  | 0.0421238006      |
|             | 3.459       | 0.0176734064 | 0.0101760700 | -0.0098163526 | 0.0003597174  | 0.0421431497      |
| HOCDOS      | 3.461       | 0.0078590766 | 0.0044857727 | -0.0036414239 | 0.0008443487  | 0.0213204856      |
|             | 3.230       | 0.0649475757 | 0.0293196731 | -0.0468186205 | -0.0174989474 | 0.0472829027      |
| IWODUU      | 3.230       | 0.0854338286 | 0.0361658348 | -0.0677077795 | -0.0315419448 | 0.0184955601      |
| KUSSOH      | 3.713       | 0.0160768024 | 0.0100241232 | -0.0091618338 | 0.0008622894  | 0.0435456503      |
| PEBPUH      | 2.569       | 0.0128470034 | 0.0077367470 | -0.0068400534 | 0.0008966937  | 0.0345337628      |
| RAGSAT      | 2.428       | 0.1101535076 | 0.0417764773 | -0.0926227507 | -0.0508462734 | -0.0362791843     |
| TAJMEW      | 3.212       |              |              | not ChB       |               |                   |
| TAVWUI      | 3.366       | 0.0242639244 | 0.0138228666 | -0.0144509693 | -0.0006281027 | 0.0527790556      |
|             | 2.705       | 0.0305967998 | 0.0159553289 | -0.0182492383 | -0.0022939094 | 0.0546456781      |
| XATJEH      | 2.311       | 0.0806962410 | 0.0345245925 | -0.0625264385 | -0.0280018460 | 0.0260909858      |
|             | 2.313       | 0.0386737577 | 0.0187856869 | -0.0238379718 | -0.0050522849 | 0.0549336078      |
| KABSIQ      | 2.343       | 0.0996253100 | 0.0405714478 | -0.0841620295 | -0.0435905818 | -0.0120765360     |
| ISUKAJ      | 2.352       | 0.0990726558 | 0.0409529067 | -0.0840049674 | -0.0430520607 | -0.0083966161     |
| TEVGIL      | 2.402       | 0.0898072885 | 0.0377181690 | -0.0724404826 | -0.0347223136 | 0.0119834217      |
| TIRZAV      | 2.425       | 0.0859309990 | 0.0363689655 | -0.0683172504 | -0.0319482849 | 0.0176827224      |
| IRABEI      | 2.526       | 0.0742154056 | 0.0309229334 | -0.0530858768 | -0.0221629434 | 0.0350399600      |
| KABSIQ      | 2.589       | 0.0664765323 | 0.0280375947 | -0.0454164254 | -0.0173788307 | 0.0426350561      |
|             | 2.343       | 0.0996253100 | 0.0405714478 | -0.0841620295 | -0.0435905818 | -0.0120765360     |

**Table S8.** CSD refcodes, interatomic distances Se...Br distances  $d_{x...y}$ (in Å) and characteristics of the BCPs along Se...Br bonds in the optimized in CH<sub>2</sub>Cl<sub>2</sub> structures containing Se...Br contacts (all in atomic units)

| CSD Refcode | $d_{x...y}$ | $\rho(r)$    | $G(r)$       | $V(r)$        | $H(r)$        | $\nabla^2\rho(r)$ |
|-------------|-------------|--------------|--------------|---------------|---------------|-------------------|
| ACIMOP      | 3.282       | 0.0162726986 | 0.0094842345 | -0.0089356846 | 0.0005485498  | 0.0401311374      |
| ACINEG      | 3.216       | 0.0184854122 | 0.0105251048 | -0.0102332481 | 0.0002918566  | 0.0432678456      |
| ADUQUN      | 2.420       | 0.0862783023 | 0.0369651389 | -0.0695954520 | -0.0326303132 | 0.0173393027      |
| CALROW      | 3.352       | 0.0648323613 | 0.0288769030 | -0.0462057196 | -0.0173288166 | 0.0461923456      |
|             | 2.806       | 0.0625372304 | 0.0280952126 | -0.0441056249 | -0.0160104123 | 0.0483392012      |
|             | 3.054       | 0.0112429543 | 0.0068522905 | -0.0059175591 | 0.0009347313  | 0.0311480872      |
|             | 2.574       | 0.0656859437 | 0.0292902420 | -0.0469503533 | -0.0176601114 | 0.0465205223      |
|             | 2.592       | 0.0623683326 | 0.0280530115 | -0.0437659274 | -0.0157129159 | 0.0493603823      |
| CIDXOD      | 3.475       | 0.0405693757 | 0.0196376905 | -0.0253848709 | -0.0057471803 | 0.0555620407      |
|             | 2.568       | 0.0771502979 | 0.0332857720 | -0.0588164850 | -0.0255307130 | 0.0310202363      |
| ECIYIA2     | 2.596       | 0.0114322307 | 0.0067576411 | -0.0060082109 | 0.0007494302  | 0.0300282853      |
|             | 2.816       | 0.0114309742 | 0.0067568090 | -0.0060073275 | 0.0007494815  | 0.0300251617      |
|             | 2.477       | 0.1129955770 | 0.0412103613 | -0.0943034949 | -0.0530931336 | -0.0475310892     |
|             | 3.504       | 0.1129981954 | 0.0412105031 | -0.0943063595 | -0.0530958564 | -0.0475414133     |
|             | 3.504       | 0.0664119060 | 0.0281912113 | -0.0452441551 | -0.0170529438 | 0.0445530700      |
|             | 2.306       | 0.0664128341 | 0.0281912649 | -0.0452448296 | -0.0170535647 | 0.0445508008      |
|             | 2.306       | 0.0744494338 | 0.0310449579 | -0.0528675451 | -0.0218225872 | 0.0368894831      |
|             | 2.528       | 0.0744431998 | 0.0310418975 | -0.0528604344 | -0.0218185369 | 0.0368934423      |
| ECIYUM2     | 2.528       | 0.1129052682 | 0.0412162323 | -0.0942431376 | -0.0530269053 | -0.0472426918     |
|             | 2.590       | 0.1127429601 | 0.0411108569 | -0.0939772551 | -0.0528663982 | -0.0470221651     |
|             | 2.590       | 0.0740642994 | 0.0309339496 | -0.0525032391 | -0.0215692894 | 0.0374586408      |
|             | 2.307       | 0.0774615691 | 0.0320198205 | -0.0559005432 | -0.0238807227 | 0.0325563914      |
|             | 2.307       | 0.0663382478 | 0.0281668086 | -0.0451579966 | -0.0169911881 | 0.0447024821      |
|             | 2.531       | 0.0629670758 | 0.0269680808 | -0.0420384192 | -0.0150703384 | 0.0475909697      |
|             | 2.507       | 0.0119058610 | 0.0070551772 | -0.0063126203 | 0.0007425570  | 0.0311909369      |
|             | 2.590       | 0.0116547537 | 0.0069126384 | -0.0061575740 | 0.0007550644  | 0.0306708114      |
| GIHDAF      | 2.619       | 0.0135343214 | 0.0081834993 | -0.0074002810 | 0.0007832183  | 0.0358668706      |
|             | 3.481       | 0.0136266636 | 0.0082499315 | -0.0074703520 | 0.0007795795  | 0.0361180438      |
| HOCDOS      | 3.491       | 0.0084443216 | 0.0048384997 | -0.0039970118 | 0.0008414879  | 0.0227199507      |
|             | 3.359       | 0.0431066677 | 0.0207873921 | -0.0274261000 | -0.0066387080 | 0.0565947365      |
| IWODUU      | 3.263       | 0.0643850268 | 0.0288344916 | -0.0460370027 | -0.0172025112 | 0.0465279218      |
| KUSSOH      | 3.679       | 0.0085200181 | 0.0047420516 | -0.0040080259 | 0.0007340257  | 0.0219043092      |
| PEBPUH      | 2.782       | 0.0133485832 | 0.0079676375 | -0.0071528326 | 0.0008148048  | 0.0351297692      |
| RAGSAT      | 2.574       | 0.1111266525 | 0.0419193366 | -0.0937835469 | -0.0518642103 | -0.0397794946     |
| TAJMEW      | 3.715       | 0.0184736300 | 0.0107353911 | -0.0104345032 | 0.0003008879  | 0.0441451157      |
|             | 3.364       | 0.0185294626 | 0.0107637445 | -0.0104699939 | 0.0002937506  | 0.0442299805      |
| TAVWUI      | 2.739       | 0.0176141499 | 0.0104463467 | -0.0099989034 | 0.0004474433  | 0.0435751603      |
|             | 2.304       | 0.0179325450 | 0.0105767393 | -0.0101751385 | 0.0004016008  | 0.0439133606      |
| XATJEH      | 2.308       | 0.0779099613 | 0.0336106399 | -0.0596972157 | -0.0260865759 | 0.0300962561      |
|             | 2.979       | 0.0394631813 | 0.0191612176 | -0.0244857544 | -0.0053245368 | 0.0553467231      |
| ISUKAJ      | 2.351       | 0.0978946154 | 0.0400927339 | -0.0822870427 | -0.0421943088 | -0.0084062997     |
| TEVGIL      | 2.356       | 0.0981992462 | 0.0406544227 | -0.0830077098 | -0.0423532871 | -0.0067954575     |
| TIRZAV      | 2.503       | 0.0740476387 | 0.0323069560 | -0.0552615383 | -0.0229545823 | 0.0374094946      |
| IRABEI      | 2.566       | 0.0652683694 | 0.0291854326 | -0.0469256651 | -0.0177402325 | 0.0457808008      |
| KABSIQ      | 2.536       | 0.0725192112 | 0.0299813443 | -0.0511735849 | -0.0211922406 | 0.0351564148      |
| ISUKAJ      | 2.618       | 0.0626335141 | 0.0263861507 | -0.0416913038 | -0.0153051531 | 0.0443239907      |

**Table S9.** CSD refcodes, energies (from single point calculations, in Hartree) and coordinates of the solid-state (experimental) structures containing Se...Br contacts.

|    | CSD refcode | E(RM062X)    | Coordinates |             |             |             |
|----|-------------|--------------|-------------|-------------|-------------|-------------|
| 1  | ACIMOP      | -5668.308815 | C           | 1.48530000  | 14.56020000 | 5.19490000  |
|    |             |              | H           | 0.68540000  | 14.23670000 | 5.66270000  |
|    |             |              | H           | 1.47650000  | 15.54020000 | 5.17810000  |
|    |             |              | H           | 2.28580000  | 14.24720000 | 5.66090000  |
|    |             |              | C           | 2.96670000  | 14.56590000 | 2.74190000  |
|    |             |              | H           | 3.00330000  | 14.25100000 | 1.81360000  |
|    |             |              | H           | 3.75620000  | 14.24440000 | 3.22650000  |
|    |             |              | H           | 2.95400000  | 15.54590000 | 2.75310000  |
|    |             |              | C           | 0.00920000  | 14.51840000 | 2.63010000  |
|    |             |              | H           | -0.79500000 | 14.17210000 | 3.07000000  |
|    |             |              | H           | 0.04220000  | 14.19110000 | 1.70550000  |
|    |             |              | H           | -0.01000000 | 15.49640000 | 2.63190000  |
|    |             |              | C           | 1.82450000  | 11.50240000 | 1.75030000  |
|    |             |              | C           | 3.16090000  | 11.50910000 | 1.23950000  |
|    |             |              | H           | 3.90470000  | 11.64130000 | 1.81920000  |
|    |             |              | C           | 0.77900000  | 11.25700000 | 0.88540000  |
|    |             |              | H           | -0.11550000 | 11.21320000 | 1.19480000  |
|    |             |              | C           | 3.35570000  | 11.32170000 | -0.11930000 |
|    |             |              | H           | 4.23080000  | 11.34640000 | -0.48280000 |
|    |             |              | C           | 2.28770000  | 11.10280000 | -0.93760000 |
| H  | 2.41700000  | 10.95630000  | -1.86770000 |             |             |             |
| C  | 1.08100000  | 11.08190000  | -0.43240000 |             |             |             |
| H  | 0.35910000  | 10.93630000  | -1.03080000 |             |             |             |
| Br | 1.49000000  | 8.38090000   | 3.55380000  |             |             |             |
| Se | 1.50270000  | 11.70750000  | 3.62360000  |             |             |             |
| P  | 1.48570000  | 13.93900000  | 3.52850000  |             |             |             |
| 2  | ACINEG      | -6243.229759 | C           | 7.95950000  | 7.93070000  | -3.92720000 |
|    |             |              | C           | 7.50660000  | 9.00690000  | -3.18420000 |
|    |             |              | C           | 7.80950000  | 9.08730000  | -1.83400000 |
|    |             |              | C           | 8.55550000  | 8.09640000  | -1.22690000 |
|    |             |              | C           | 9.02530000  | 7.03680000  | -1.95910000 |
|    |             |              | C           | 8.73080000  | 6.94310000  | -3.31650000 |
|    |             |              | C           | 6.47030000  | 6.30870000  | -5.81920000 |
|    |             |              | C           | 5.74110000  | 5.86510000  | -4.71740000 |
|    |             |              | C           | 4.91090000  | 4.77040000  | -4.84970000 |
|    |             |              | C           | 4.80430000  | 4.10260000  | -6.03670000 |
|    |             |              | C           | 5.51530000  | 4.53110000  | -7.15310000 |
|    |             |              | C           | 6.35110000  | 5.63750000  | -7.04610000 |
|    |             |              | C           | 6.74930000  | 9.16760000  | -6.33390000 |
|    |             |              | C           | 5.50970000  | 9.04380000  | -6.98820000 |
|    |             |              | C           | 4.91230000  | 10.12340000 | -7.57170000 |
|    |             |              | C           | 5.54750000  | 11.36040000 | -7.53550000 |
|    |             |              | C           | 6.75210000  | 11.52270000 | -6.87760000 |
|    |             |              | C           | 7.35650000  | 10.41460000 | -6.27050000 |
|    |             |              | C           | 10.25090000 | 8.78260000  | -6.64560000 |
|    |             |              | C           | 10.85950000 | 9.17430000  | -5.46040000 |
|    |             |              | C           | 11.39800000 | 10.44310000 | -5.38610000 |
|    |             |              | C           | 11.34750000 | 11.30180000 | -6.46440000 |
|    |             |              | H           | 11.71210000 | 12.15540000 | -6.40820000 |
|    |             |              | C           | 10.74450000 | 10.86820000 | -7.62970000 |
|    |             |              | C           | 10.17100000 | 9.64630000  | -7.72940000 |
|    |             |              | P           | 7.56320000  | 7.71270000  | -5.66590000 |
|    |             |              | Se          | 9.41400000  | 7.05020000  | -6.78120000 |
|    |             |              | Br          | 11.95340000 | 5.93840000  | -7.93330000 |
|    |             |              | H           | 6.95550000  | 9.57440000  | -3.53390000 |
|    |             |              | H           | 7.54440000  | 9.82540000  | -1.34110000 |
| H  | 8.79250000  | 8.25200000   | -0.29000000 |             |             |             |
| H  | 9.53570000  | 6.34390000   | -1.55860000 |             |             |             |
| H  | 9.14310000  | 6.15970000   | -3.80580000 |             |             |             |

|   |        |              |    |             |             |             |
|---|--------|--------------|----|-------------|-------------|-------------|
|   |        |              | H  | 5.80560000  | 6.31040000  | -3.86020000 |
|   |        |              | H  | 4.41730000  | 4.36870000  | -3.93260000 |
|   |        |              | H  | 4.24900000  | 3.41460000  | -6.14360000 |
|   |        |              | H  | 5.42690000  | 4.13440000  | -8.02840000 |
|   |        |              | H  | 6.89940000  | 5.94210000  | -7.73840000 |
|   |        |              | H  | 5.17450000  | 8.26880000  | -7.01350000 |
|   |        |              | H  | 4.08070000  | 9.99280000  | -7.99220000 |
|   |        |              | H  | 5.13250000  | 12.11860000 | -7.88340000 |
|   |        |              | H  | 7.20790000  | 12.28600000 | -6.85040000 |
|   |        |              | H  | 8.13340000  | 10.52850000 | -5.78120000 |
|   |        |              | H  | 10.92400000 | 8.50310000  | -4.65760000 |
|   |        |              | H  | 11.82150000 | 10.74610000 | -4.63940000 |
|   |        |              | H  | 10.71360000 | 11.46580000 | -8.24590000 |
|   |        |              | H  | 9.70400000  | 9.28980000  | -8.59020000 |
| 3 | ADUQUN | -8180.57579  | Se | 7.25880000  | 1.74730000  | 4.37760000  |
|   |        |              | Br | 9.26030000  | 0.46570000  | 3.79740000  |
|   |        |              | Br | -0.75700000 | 4.58420000  | 7.29560000  |
|   |        |              | O  | 5.46520000  | 2.91130000  | 4.80080000  |
|   |        |              | N  | 4.48170000  | 4.88390000  | 4.30350000  |
|   |        |              | H  | 4.57690000  | 5.61410000  | 3.85900000  |
|   |        |              | C  | 7.69970000  | 3.34330000  | 3.46050000  |
|   |        |              | C  | 6.72370000  | 4.35790000  | 3.50870000  |
|   |        |              | C  | 1.54070000  | 3.47170000  | 6.05960000  |
|   |        |              | H  | 1.18660000  | 2.65310000  | 6.32150000  |
|   |        |              | C  | 5.52150000  | 4.01830000  | 4.23580000  |
|   |        |              | C  | 8.89180000  | 3.60010000  | 2.79550000  |
|   |        |              | H  | 9.54490000  | 2.93890000  | 2.75650000  |
|   |        |              | C  | 6.97900000  | 5.57540000  | 2.89660000  |
|   |        |              | H  | 6.33470000  | 6.24630000  | 2.92190000  |
|   |        |              | C  | 3.26570000  | 4.74860000  | 5.00300000  |
|   |        |              | C  | 2.72740000  | 3.52970000  | 5.37170000  |
|   |        |              | H  | 3.17290000  | 2.74420000  | 5.15230000  |
|   |        |              | C  | 1.40660000  | 5.86390000  | 5.98380000  |
|   |        |              | H  | 0.95620000  | 6.65080000  | 6.19400000  |
|   |        |              | C  | 8.17560000  | 5.80460000  | 2.25110000  |
|   |        |              | H  | 8.34410000  | 6.62870000  | 1.85260000  |
|   |        |              | C  | 9.12000000  | 4.80240000  | 2.20290000  |
|   |        |              | H  | 9.92300000  | 4.95010000  | 1.75840000  |
|   |        |              | C  | 0.88620000  | 4.64370000  | 6.35480000  |
|   |        |              | C  | 2.59480000  | 5.90950000  | 5.30270000  |
|   |        |              | H  | 2.94890000  | 6.72810000  | 5.04090000  |
| 4 | CALROW | -15556.89928 | Se | 1.75550000  | 5.01350000  | 0.68040000  |
|   |        |              | Br | 3.59350000  | 3.22120000  | -0.33930000 |
|   |        |              | Br | -0.03420000 | 6.49880000  | 1.42080000  |
|   |        |              | N  | 0.24710000  | 4.78610000  | -1.64480000 |
|   |        |              | H  | -0.29800000 | 4.30100000  | -1.11870000 |
|   |        |              | H  | 0.09290000  | 4.89750000  | -2.36550000 |
|   |        |              | N  | 2.03530000  | 6.19250000  | -1.91380000 |
|   |        |              | C  | 1.31710000  | 5.37940000  | -1.17760000 |
|   |        |              | C  | 1.60840000  | 6.51280000  | -3.28350000 |
|   |        |              | H  | 0.76700000  | 6.05130000  | -3.47990000 |
|   |        |              | H  | 2.29720000  | 6.22240000  | -3.91720000 |
|   |        |              | H  | 1.47640000  | 7.48130000  | -3.36720000 |
|   |        |              | C  | 3.28320000  | 6.83300000  | -1.50210000 |
|   |        |              | H  | 3.49280000  | 6.57560000  | -0.57980000 |
|   |        |              | H  | 3.18410000  | 7.80620000  | -1.55510000 |
|   |        |              | H  | 4.00850000  | 6.54570000  | -2.09390000 |
|   |        |              | Se | 0.82840000  | 2.83510000  | 4.95020000  |
|   |        |              | Br | 2.66640000  | 4.62740000  | 3.93060000  |
|   |        |              | Br | -0.96130000 | 1.34980000  | 5.69070000  |
|   |        |              | N  | -0.68000000 | 3.06250000  | 2.62510000  |
|   |        |              | H  | -1.22510000 | 3.54760000  | 3.15120000  |
|   |        |              | H  | -0.83420000 | 2.95110000  | 1.90440000  |

|   |         |              |    |             |             |             |
|---|---------|--------------|----|-------------|-------------|-------------|
|   |         |              | N  | 1.10820000  | 1.65610000  | 2.35610000  |
|   |         |              | C  | 0.39000000  | 2.46920000  | 3.09220000  |
|   |         |              | C  | 0.68140000  | 1.33580000  | 0.98630000  |
|   |         |              | H  | -0.16010000 | 1.79730000  | 0.78990000  |
|   |         |              | H  | 1.37010000  | 1.62620000  | 0.35270000  |
|   |         |              | H  | 0.54930000  | 0.36730000  | 0.90260000  |
|   |         |              | C  | 2.35610000  | 1.01560000  | 2.76770000  |
|   |         |              | H  | 2.56570000  | 1.27300000  | 3.69000000  |
|   |         |              | H  | 2.25700000  | 0.04240000  | 2.71480000  |
|   |         |              | H  | 3.08140000  | 1.30290000  | 2.17590000  |
| 5 | CIDXOD  | -7876.73927  | C  | 13.29700000 | 1.55910000  | 4.07080000  |
|   |         |              | C  | 13.04840000 | 2.75020000  | 3.43760000  |
|   |         |              | C  | 13.42120000 | 3.94010000  | 4.02870000  |
|   |         |              | H  | 13.25340000 | 4.75440000  | 3.61180000  |
|   |         |              | C  | 14.05720000 | 3.88700000  | 5.27220000  |
|   |         |              | H  | 14.30740000 | 4.67860000  | 5.69250000  |
|   |         |              | C  | 14.32190000 | 2.68450000  | 5.88540000  |
|   |         |              | H  | 14.76260000 | 2.66170000  | 6.70520000  |
|   |         |              | C  | 13.93290000 | 1.52240000  | 5.27850000  |
|   |         |              | H  | 14.10240000 | 0.70430000  | 5.68910000  |
|   |         |              | C  | 12.39950000 | 2.82230000  | 2.08830000  |
|   |         |              | H  | 12.83210000 | 2.19010000  | 1.49240000  |
|   |         |              | H  | 12.52380000 | 3.71120000  | 1.72050000  |
|   |         |              | N  | 10.93070000 | 2.51630000  | 2.15260000  |
|   |         |              | Se | 12.75990000 | -0.10530000 | 3.24510000  |
|   |         |              | Br | 14.84210000 | -0.35320000 | 1.99980000  |
|   |         |              | Br | 10.32930000 | 0.27100000  | 4.59220000  |
|   |         |              | H  | 10.83060000 | 1.83350000  | 2.63370000  |
|   |         |              | H  | 10.55814306 | 2.27906492  | 1.25542619  |
|   |         |              | H  | 10.39612647 | 3.26057331  | 2.55296031  |
| 6 | ECIYIA2 | -21630.68073 | C  | 1.24170000  | 15.11600000 | 7.74250000  |
|   |         |              | C  | 1.26400000  | 16.39370000 | 8.31210000  |
|   |         |              | H  | 1.30000000  | 16.50010000 | 9.25540000  |
|   |         |              | C  | 1.23320000  | 17.51920000 | 7.46250000  |
|   |         |              | H  | 1.26090000  | 18.40390000 | 7.81060000  |
|   |         |              | C  | 1.15940000  | 17.28090000 | 6.09430000  |
|   |         |              | C  | 1.18850000  | 16.03880000 | 5.54820000  |
|   |         |              | H  | 1.20630000  | 15.93740000 | 4.60380000  |
|   |         |              | C  | 1.19390000  | 14.90820000 | 6.36900000  |
|   |         |              | H  | 1.16480000  | 14.03110000 | 6.00280000  |
|   |         |              | Se | 1.25000000  | 13.57020000 | 8.93910000  |
|   |         |              | Br | -0.29560000 | 14.41970000 | 10.48240000 |
|   |         |              | Br | -0.63520000 | 12.27330000 | 7.52760000  |
|   |         |              | Br | 3.26430000  | 14.37020000 | 10.14020000 |
|   |         |              | Cl | 1.07720000  | 18.68400000 | 5.04880000  |
|   |         |              | C  | 3.39930000  | 10.23370000 | 13.55150000 |
|   |         |              | C  | 3.37700000  | 8.95600000  | 12.98190000 |
|   |         |              | H  | 3.34100000  | 8.84960000  | 12.03860000 |
|   |         |              | C  | 3.40770000  | 7.83050000  | 13.83150000 |
|   |         |              | H  | 3.38010000  | 6.94580000  | 13.48340000 |
|   |         |              | C  | 3.48160000  | 8.06880000  | 15.19970000 |
|   |         |              | C  | 3.45240000  | 9.31090000  | 15.74590000 |
|   |         |              | H  | 3.43460000  | 9.41230000  | 16.69020000 |
|   |         |              | C  | 3.44710000  | 10.44150000 | 14.92500000 |
|   |         |              | H  | 3.47620000  | 11.31860000 | 15.29120000 |
|   |         |              | Se | 3.39090000  | 11.77950000 | 12.35490000 |
|   |         |              | Br | 4.93660000  | 10.93000000 | 10.81160000 |
|   |         |              | Br | 5.27620000  | 13.07640000 | 13.76640000 |
|   |         |              | Br | 1.37660000  | 10.97950000 | 11.15380000 |
|   |         |              | Cl | 3.56380000  | 6.66570000  | 16.24520000 |
| 7 | ECIYUM2 | -20909.96787 | C  | 4.10690000  | 3.99370000  | 9.18500000  |
|   |         |              | C  | 4.44920000  | 4.12390000  | 7.80060000  |
|   |         |              | H  | 4.73020000  | 4.95500000  | 7.44400000  |

|   |         |              |    |            |            |            |
|---|---------|--------------|----|------------|------------|------------|
|   |         |              | C  | 4.3650000  | 3.0151000  | 6.9989000  |
|   |         |              | H  | 4.5728000  | 3.0715000  | 6.0736000  |
|   |         |              | C  | 3.9733000  | 1.8152000  | 7.5582000  |
|   |         |              | C  | 3.7089000  | 1.6386000  | 8.9007000  |
|   |         |              | H  | 3.4850000  | 0.7875000  | 9.2549000  |
|   |         |              | C  | 3.7864000  | 2.7802000  | 9.7141000  |
|   |         |              | H  | 3.6151000  | 2.7056000  | 10.6440000 |
|   |         |              | Br | 5.3355000  | 4.3990000  | 12.1887000 |
|   |         |              | Br | 6.2846000  | 6.4052000  | 9.4696000  |
|   |         |              | Br | 2.8972000  | 7.0682000  | 8.5082000  |
|   |         |              | F  | 3.8769000  | 0.7729000  | 6.7262000  |
|   |         |              | Se | 4.2372000  | 5.5704000  | 10.3345000 |
|   |         |              | C  | 5.4975000  | 8.9588000  | 15.2027000 |
|   |         |              | C  | 5.1162000  | 8.8167000  | 16.5172000 |
|   |         |              | H  | 4.9729000  | 7.9437000  | 16.8644000 |
|   |         |              | C  | 4.9314000  | 9.9137000  | 17.3585000 |
|   |         |              | H  | 4.6878000  | 9.8281000  | 18.2721000 |
|   |         |              | C  | 5.1344000  | 11.1572000 | 16.7502000 |
|   |         |              | C  | 5.4584000  | 11.3402000 | 15.4824000 |
|   |         |              | H  | 5.5911000  | 12.2151000 | 15.1351000 |
|   |         |              | C  | 5.6045000  | 10.1987000 | 14.6527000 |
|   |         |              | H  | 5.7740000  | 10.2988000 | 13.7227000 |
|   |         |              | Br | 6.6060000  | 5.9555000  | 15.6961000 |
|   |         |              | Br | 7.7630000  | 8.0448000  | 13.1357000 |
|   |         |              | Br | 4.2948000  | 8.6930000  | 11.9265000 |
|   |         |              | F  | 4.9904000  | 12.2597000 | 17.5496000 |
|   |         |              | Se | 5.6605000  | 7.4114000  | 14.0374000 |
| 8 | GIHDAF  | -10446.95511 | Br | 6.0140000  | 1.2607000  | 16.1762000 |
|   |         |              | Se | 5.0447000  | 2.0966000  | 13.1897000 |
|   |         |              | N  | 4.0168000  | 2.6410000  | 10.4144000 |
|   |         |              | C  | 6.6667000  | 0.1361000  | 11.7749000 |
|   |         |              | C  | 5.5627000  | 0.2302000  | 12.7910000 |
|   |         |              | H  | 5.8566000  | -0.2096000 | 13.6277000 |
|   |         |              | H  | 4.7713000  | -0.2599000 | 12.4534000 |
|   |         |              | C  | 7.9863000  | 0.3750000  | 12.1259000 |
|   |         |              | H  | 8.1921000  | 0.6277000  | 13.0184000 |
|   |         |              | C  | 4.4127000  | 2.4093000  | 11.4608000 |
|   |         |              | C  | 9.0066000  | 0.2534000  | 11.2051000 |
|   |         |              | H  | 9.8996000  | 0.4396000  | 11.4716000 |
|   |         |              | Se | 10.3722000 | -2.0966000 | 8.4754000  |
|   |         |              | N  | 11.4002000 | -2.6410000 | 11.2506000 |
|   |         |              | C  | 8.7502000  | -0.1361000 | 9.8901000  |
|   |         |              | C  | 9.8542000  | -0.2302000 | 8.8740000  |
|   |         |              | H  | 9.5603000  | 0.2096000  | 8.0373000  |
|   |         |              | H  | 10.6457000 | 0.2599000  | 9.2116000  |
|   |         |              | C  | 7.4306000  | -0.3750000 | 9.5391000  |
|   |         |              | H  | 7.2248000  | -0.6277000 | 8.6467000  |
|   |         |              | C  | 11.0043000 | -2.4093000 | 10.2042000 |
|   |         |              | C  | 6.4104000  | -0.2534000 | 10.4599000 |
|   |         |              | H  | 5.5173000  | -0.4396000 | 10.1934000 |
|   |         |              | Br | 9.4029000  | -1.2607000 | 5.4888000  |
| 9 | HOCDOS2 | -11063.84211 | Se | 3.5608000  | 8.8091000  | 0.2472000  |
|   |         |              | Br | 4.7208000  | 10.9864000 | 1.1635000  |
|   |         |              | O  | 0.5935000  | 6.0749000  | -0.3711000 |
|   |         |              | N  | 2.5346000  | 7.1440000  | -0.4080000 |
|   |         |              | C  | 1.8831000  | 9.1123000  | 1.1447000  |
|   |         |              | C  | 1.5772000  | 10.1918000 | 1.9832000  |
|   |         |              | H  | 2.2098000  | 10.8788000 | 2.1062000  |
|   |         |              | C  | 0.3233000  | 10.2588000 | 2.5589000  |
|   |         |              | H  | 0.1267000  | 10.9382000 | 3.1358000  |
|   |         |              | C  | -0.6457000 | 9.3030000  | 2.3241000  |
|   |         |              | H  | -1.4155000 | 9.3832000  | 2.8227000  |
|   |         |              | C  | -0.3538000 | 8.2329000  | 1.4913000  |

|    |        |              |    |             |             |             |
|----|--------|--------------|----|-------------|-------------|-------------|
|    |        |              | H  | -0.97140000 | 7.60450000  | 1.27670000  |
|    |        |              | C  | 0.90180000  | 8.14890000  | 0.91450000  |
|    |        |              | C  | 1.33710000  | 7.10530000  | 0.02790000  |
|    |        |              | C  | 1.42460000  | 5.32660000  | -1.33140000 |
|    |        |              | H  | 0.88350000  | 5.35020000  | -2.58240000 |
|    |        |              | H  | 1.33250000  | 4.47550000  | -1.10450000 |
|    |        |              | C  | 2.83410000  | 5.98620000  | -1.29450000 |
|    |        |              | C  | 3.87970000  | 5.11150000  | -0.67190000 |
|    |        |              | H  | 4.84490000  | 5.69650000  | -0.61930000 |
|    |        |              | H  | 3.57070000  | 4.76710000  | 0.23030000  |
|    |        |              | H  | 4.02170000  | 4.33020000  | -1.25650000 |
|    |        |              | C  | 3.25160000  | 6.45610000  | -2.67410000 |
|    |        |              | H  | 4.26190000  | 6.94110000  | -2.57340000 |
|    |        |              | H  | 3.45760000  | 5.70500000  | -3.18720000 |
|    |        |              | H  | 2.62860000  | 7.07130000  | -2.96360000 |
|    |        |              | Se | 7.85120000  | 10.06290000 | -0.24720000 |
|    |        |              | Br | 6.69120000  | 7.88560000  | -1.16350000 |
|    |        |              | O  | 10.81850000 | 12.79710000 | 0.37110000  |
|    |        |              | N  | 8.87740000  | 11.72800000 | 0.40800000  |
|    |        |              | C  | 9.52890000  | 9.75970000  | -1.14470000 |
|    |        |              | C  | 9.83480000  | 8.68020000  | -1.98320000 |
|    |        |              | H  | 9.20220000  | 7.99320000  | -2.10620000 |
|    |        |              | C  | 11.08870000 | 8.61320000  | -2.55890000 |
|    |        |              | H  | 11.28530000 | 7.93380000  | -3.13580000 |
|    |        |              | C  | 12.05770000 | 9.56900000  | -2.32410000 |
|    |        |              | H  | 12.82750000 | 9.48880000  | -2.82270000 |
|    |        |              | C  | 11.76580000 | 10.63910000 | -1.49130000 |
|    |        |              | H  | 12.38340000 | 11.26750000 | -1.27670000 |
|    |        |              | C  | 10.51020000 | 10.72310000 | -0.91450000 |
|    |        |              | C  | 10.07490000 | 11.76670000 | -0.02790000 |
|    |        |              | C  | 9.98740000  | 13.54540000 | 1.33140000  |
|    |        |              | H  | 10.52850000 | 13.52180000 | 2.58240000  |
|    |        |              | H  | 10.07950000 | 14.39650000 | 1.10450000  |
|    |        |              | C  | 8.57790000  | 12.88580000 | 1.29450000  |
|    |        |              | C  | 7.53230000  | 13.76050000 | 0.67190000  |
|    |        |              | H  | 6.56710000  | 13.17550000 | 0.61930000  |
|    |        |              | H  | 7.84130000  | 14.10490000 | -0.23030000 |
|    |        |              | H  | 7.39030000  | 14.54180000 | 1.25650000  |
|    |        |              | C  | 8.16040000  | 12.41590000 | 2.67410000  |
|    |        |              | H  | 7.15010000  | 11.93090000 | 2.57340000  |
|    |        |              | H  | 7.95440000  | 13.16700000 | 3.18720000  |
|    |        |              | H  | 8.78340000  | 11.80070000 | 2.96360000  |
| 10 | IWODUU | -5459.067703 | Br | 11.09710000 | 2.48180000  | 6.73350000  |
|    |        |              | C  | 8.55600000  | 3.20940000  | 8.76590000  |
|    |        |              | C  | 7.56270000  | 3.98340000  | 9.31940000  |
|    |        |              | C  | 6.30410000  | 3.41220000  | 9.54020000  |
|    |        |              | H  | 5.62180000  | 3.91560000  | 9.92290000  |
|    |        |              | C  | 6.08130000  | 2.09430000  | 9.18480000  |
|    |        |              | H  | 5.24250000  | 1.71490000  | 9.31490000  |
|    |        |              | C  | 7.07880000  | 1.35900000  | 8.65090000  |
|    |        |              | H  | 6.91820000  | 0.47020000  | 8.42860000  |
|    |        |              | C  | 8.32670000  | 1.89010000  | 8.43010000  |
|    |        |              | H  | 9.00450000  | 1.37110000  | 8.06110000  |
|    |        |              | C  | 7.87780000  | 5.40210000  | 9.62340000  |
|    |        |              | H  | 7.67180000  | 5.95970000  | 8.85660000  |
|    |        |              | H  | 7.34440000  | 5.70650000  | 10.37510000 |
|    |        |              | C  | 9.55460000  | 5.08170000  | 11.36270000 |
|    |        |              | H  | 9.17790000  | 4.19700000  | 11.48370000 |
|    |        |              | H  | 9.07450000  | 5.68620000  | 11.95100000 |
|    |        |              | C  | 10.98560000 | 5.04830000  | 11.78760000 |
|    |        |              | H  | 11.47910000 | 4.46710000  | 11.20390000 |
|    |        |              | H  | 11.04500000 | 4.72290000  | 12.68900000 |
|    |        |              | H  | 11.35350000 | 5.93350000  | 11.74230000 |



|    |        |              |    |             |             |             |
|----|--------|--------------|----|-------------|-------------|-------------|
|    |        |              | C  | 9.88540000  | 6.83990000  | 9.61890000  |
|    |        |              | H  | 9.75980000  | 7.00210000  | 8.67060000  |
|    |        |              | H  | 10.83970000 | 6.82530000  | 9.78980000  |
|    |        |              | C  | 9.27340000  | 7.98240000  | 10.38870000 |
|    |        |              | H  | 8.32300000  | 7.98520000  | 10.25710000 |
|    |        |              | H  | 9.64270000  | 8.81290000  | 10.07860000 |
|    |        |              | H  | 9.46620000  | 7.87810000  | 11.32330000 |
|    |        |              | N  | 9.32020000  | 5.50710000  | 9.95310000  |
|    |        |              | Se | 10.22250000 | 4.12130000  | 8.52690000  |
| 11 | KUSSOH | -5553.659052 | Br | 2.64040000  | 8.35410000  | 13.21510000 |
|    |        |              | C  | -1.10090000 | 10.52590000 | 16.48760000 |
|    |        |              | C  | -0.95040000 | 10.55870000 | 17.85760000 |
|    |        |              | C  | -1.95660000 | 11.37030000 | 15.80120000 |
|    |        |              | C  | -2.06340000 | 11.12350000 | 14.32650000 |
|    |        |              | H  | -2.79720000 | 10.51460000 | 14.14540000 |
|    |        |              | H  | -2.23900000 | 11.95770000 | 13.86350000 |
|    |        |              | C  | 0.07440000  | 9.62390000  | 18.41970000 |
|    |        |              | H  | 0.92540000  | 10.08000000 | 18.50990000 |
|    |        |              | H  | -0.20340000 | 9.31710000  | 19.29750000 |
|    |        |              | C  | -0.85680000 | 7.47450000  | 17.70820000 |
|    |        |              | H  | -0.76060000 | 7.08180000  | 18.57860000 |
|    |        |              | H  | -0.79160000 | 6.78980000  | 17.03860000 |
|    |        |              | H  | -1.71330000 | 7.90460000  | 17.64480000 |
|    |        |              | C  | 1.53860000  | 7.81630000  | 17.61830000 |
|    |        |              | H  | 2.23050000  | 8.46830000  | 17.47740000 |
|    |        |              | H  | 1.61560000  | 7.12370000  | 16.95760000 |
|    |        |              | H  | 1.63120000  | 7.43610000  | 18.49400000 |
|    |        |              | C  | 0.22290000  | 11.58420000 | 13.58330000 |
|    |        |              | H  | 1.06940000  | 11.17330000 | 13.38950000 |
|    |        |              | H  | 0.31190000  | 12.14780000 | 14.35510000 |
|    |        |              | H  | -0.05520000 | 12.11270000 | 12.83090000 |
|    |        |              | C  | -0.98410000 | 9.69970000  | 12.65300000 |
|    |        |              | H  | -1.27370000 | 10.24980000 | 11.92350000 |
|    |        |              | H  | -1.65310000 | 9.03420000  | 12.83800000 |
|    |        |              | H  | -0.15860000 | 9.26850000  | 12.42220000 |
|    |        |              | C  | -2.68600000 | 12.29160000 | 16.52940000 |
|    |        |              | H  | -3.26730000 | 12.87330000 | 16.09420000 |
|    |        |              | C  | -2.54860000 | 12.34930000 | 17.90200000 |
|    |        |              | H  | -3.03940000 | 12.97290000 | 18.38480000 |
|    |        |              | C  | -1.69270000 | 11.49360000 | 18.57160000 |
|    |        |              | H  | -1.61390000 | 11.54230000 | 19.49660000 |
|    |        |              | N  | 0.21250000  | 8.47050000  | 17.49800000 |
|    |        |              | N  | -0.78390000 | 10.53720000 | 13.85010000 |
|    |        |              | Se | -0.06280000 | 9.30190000  | 15.49590000 |
| 12 | PEBPUH | -15125.88935 | Br | 6.79500000  | 10.11090000 | 1.60270000  |
|    |        |              | Se | 2.14250000  | 7.40370000  | 0.86770000  |
|    |        |              | Se | 4.23190000  | 8.57500000  | 1.06250000  |
|    |        |              | C  | 2.87430000  | 5.88210000  | 0.12700000  |
|    |        |              | C  | 4.69530000  | 7.63860000  | 2.61910000  |
|    |        |              | N  | 3.26840000  | 4.93240000  | -0.31850000 |
|    |        |              | N  | 4.96040000  | 7.05650000  | 3.55740000  |
|    |        |              | Br | 3.39750000  | 10.31310000 | -1.60270000 |
|    |        |              | Se | -1.25500000 | 13.02030000 | -0.86770000 |
|    |        |              | Se | 0.83440000  | 11.84900000 | -1.06250000 |
|    |        |              | C  | -0.52320000 | 14.54190000 | -0.12700000 |
|    |        |              | C  | 1.29780000  | 12.78540000 | -2.61910000 |
|    |        |              | N  | -0.12910000 | 15.49160000 | 0.31850000  |
|    |        |              | N  | 1.56290000  | 13.36750000 | -3.55740000 |
| 13 | RAGSAT | -10585.78522 | Se | 2.49720000  | 9.93530000  | 2.88310000  |
|    |        |              | Br | 0.70050000  | 6.94140000  | 8.32290000  |
|    |        |              | Br | -2.74830000 | 10.50060000 | -0.79710000 |
|    |        |              | Br | 3.53590000  | 8.24530000  | 1.78110000  |
|    |        |              | C  | 1.92530000  | 8.97830000  | 4.41380000  |

|    |        |              |    |             |             |             |
|----|--------|--------------|----|-------------|-------------|-------------|
|    |        |              | C  | 2.71910000  | 8.00350000  | 4.95550000  |
|    |        |              | H  | 3.51830000  | 7.75860000  | 4.55040000  |
|    |        |              | C  | 2.29570000  | 7.39130000  | 6.13040000  |
|    |        |              | H  | 2.78750000  | 6.68740000  | 6.48730000  |
|    |        |              | C  | 1.17990000  | 7.81220000  | 6.75250000  |
|    |        |              | C  | 0.38350000  | 8.80990000  | 6.21080000  |
|    |        |              | H  | -0.40710000 | 9.06400000  | 6.62710000  |
|    |        |              | C  | 0.78100000  | 9.40680000  | 5.06320000  |
|    |        |              | H  | 0.28290000  | 10.10760000 | 4.70790000  |
|    |        |              | C  | 0.90930000  | 10.09540000 | 1.86940000  |
|    |        |              | C  | 0.77960000  | 11.20330000 | 1.10260000  |
|    |        |              | H  | 1.43170000  | 11.86750000 | 1.10590000  |
|    |        |              | C  | -0.35170000 | 11.31810000 | 0.31500000  |
|    |        |              | H  | -0.48410000 | 12.08170000 | -0.19930000 |
|    |        |              | C  | -1.25930000 | 10.32950000 | 0.29090000  |
|    |        |              | C  | -1.12520000 | 9.21700000  | 1.04000000  |
|    |        |              | H  | -1.78050000 | 8.55740000  | 1.02390000  |
|    |        |              | C  | 0.01150000  | 9.06700000  | 1.84360000  |
|    |        |              | H  | 0.15070000  | 8.29270000  | 2.34190000  |
| 14 | TAJMEW | -10408.57517 | Se | -0.39340000 | 1.94680000  | 2.27830000  |
|    |        |              | Se | 1.17060000  | 2.66660000  | 3.92940000  |
|    |        |              | C  | 0.89450000  | 1.00520000  | 1.27560000  |
|    |        |              | N  | 1.85650000  | 1.76130000  | 0.65370000  |
|    |        |              | N  | 0.84280000  | -0.27890000 | 1.01160000  |
|    |        |              | C  | -0.24870000 | -1.12970000 | 1.54310000  |
|    |        |              | C  | 1.72090000  | -0.96110000 | 0.03720000  |
|    |        |              | C  | 0.89690000  | 1.04800000  | 4.94280000  |
|    |        |              | N  | -0.14350000 | 1.05190000  | 5.73640000  |
|    |        |              | N  | 1.69230000  | 0.01040000  | 4.78860000  |
|    |        |              | C  | 1.45280000  | -1.21790000 | 5.55400000  |
|    |        |              | C  | 2.93710000  | 0.10770000  | 4.03570000  |
|    |        |              | H  | 1.86020000  | 2.64850000  | 0.74580000  |
|    |        |              | H  | 2.49750000  | 1.34890000  | 0.16650000  |
|    |        |              | H  | -0.84470000 | -0.60310000 | 2.06570000  |
|    |        |              | H  | 0.10880000  | -1.83530000 | 2.06570000  |
|    |        |              | H  | -0.73820000 | -1.50580000 | 0.79900000  |
|    |        |              | H  | 2.58750000  | -0.57460000 | 0.05310000  |
|    |        |              | H  | 1.77930000  | -1.89230000 | 0.25510000  |
|    |        |              | H  | 1.34510000  | -0.87160000 | -0.83970000 |
|    |        |              | H  | -0.67320000 | 1.77690000  | 5.79140000  |
|    |        |              | H  | -0.32720000 | 0.32680000  | 6.24840000  |
|    |        |              | H  | 0.59780000  | -1.17510000 | 5.98270000  |
|    |        |              | H  | 2.13080000  | -1.33850000 | 6.21480000  |
|    |        |              | H  | 1.45880000  | -1.98050000 | 4.96230000  |
|    |        |              | H  | 3.66440000  | -0.14530000 | 4.58490000  |
|    |        |              | H  | 2.88850000  | -0.47730000 | 3.27570000  |
|    |        |              | H  | 3.05140000  | 1.00520000  | 3.73100000  |
|    |        |              | Br | 3.21620000  | 3.00770000  | 6.17400000  |
|    |        |              | Br | -2.68052278 | 0.56736202  | 0.47979500  |
| 15 | TAVWUI | -10561.01744 | Br | -0.67840000 | -0.02370000 | 2.58940000  |
|    |        |              | Br | 6.20010000  | 3.47750000  | -1.52240000 |
|    |        |              | Se | 2.16430000  | 1.00210000  | 1.41690000  |
|    |        |              | Se | 3.88330000  | 2.04150000  | 0.08750000  |
|    |        |              | N  | 0.61820000  | 3.25160000  | 2.30740000  |
|    |        |              | N  | 0.15170000  | 2.75110000  | 0.26010000  |
|    |        |              | N  | 3.89950000  | 4.69430000  | 1.21400000  |
|    |        |              | N  | 5.21460000  | 3.35890000  | 2.29460000  |
|    |        |              | C  | 0.95850000  | 2.43250000  | 1.31430000  |
|    |        |              | C  | -0.68530000 | 3.79270000  | 0.64700000  |
|    |        |              | C  | -0.38510000 | 3.91140000  | 1.90930000  |
|    |        |              | C  | 1.23570000  | 3.24930000  | 3.66620000  |
|    |        |              | C  | 0.15550000  | 2.10930000  | -1.03760000 |
|    |        |              | C  | 4.32420000  | 3.42890000  | 1.26680000  |

|    |        |              |    |             |             |             |
|----|--------|--------------|----|-------------|-------------|-------------|
|    |        |              | C  | 5.34340000  | 4.61640000  | 2.86620000  |
|    |        |              | C  | 4.52380000  | 5.44450000  | 2.17240000  |
|    |        |              | C  | 2.96400000  | 5.23100000  | 0.20210000  |
|    |        |              | C  | 5.97920000  | 2.16920000  | 2.70410000  |
|    |        |              | H  | -1.35350000 | 4.21300000  | 0.10100000  |
|    |        |              | H  | -0.78080000 | 4.81520000  | 2.43260000  |
|    |        |              | H  | 0.83030000  | 3.93960000  | 4.19560000  |
|    |        |              | H  | 2.18120000  | 3.40520000  | 3.60590000  |
|    |        |              | H  | 1.07800000  | 2.39630000  | 4.07720000  |
|    |        |              | H  | -0.50630000 | 2.52960000  | -1.59180000 |
|    |        |              | H  | -0.05630000 | 1.17840000  | -0.93730000 |
|    |        |              | H  | 1.01920000  | 2.19970000  | -1.44480000 |
|    |        |              | H  | 5.89940000  | 4.85480000  | 3.61190000  |
|    |        |              | H  | 4.39910000  | 6.38560000  | 2.31800000  |
|    |        |              | H  | 2.80470000  | 6.16310000  | 0.36500000  |
|    |        |              | H  | 2.13550000  | 4.74970000  | 0.25940000  |
|    |        |              | H  | 3.33800000  | 5.11910000  | -0.67490000 |
|    |        |              | H  | 6.52990000  | 2.38050000  | 3.46110000  |
|    |        |              | H  | 6.53390000  | 1.88000000  | 1.97560000  |
|    |        |              | H  | 5.36810000  | 1.46650000  | 2.93930000  |
| 16 | XATJEH | -8150.470163 | Br | 7.34180000  | -2.05770000 | 4.85220000  |
|    |        |              | Se | 7.33850000  | 0.08210000  | 3.60950000  |
|    |        |              | N  | 4.40690000  | 2.25980000  | 3.88330000  |
|    |        |              | C  | 7.16650000  | 1.09920000  | 5.25710000  |
|    |        |              | C  | 8.32930000  | 1.38370000  | 5.98340000  |
|    |        |              | C  | 8.25020000  | 2.03020000  | 7.15500000  |
|    |        |              | C  | 7.06700000  | 2.45380000  | 7.67290000  |
|    |        |              | C  | 5.89660000  | 2.18220000  | 6.94040000  |
|    |        |              | C  | 5.94260000  | 1.51300000  | 5.72820000  |
|    |        |              | C  | 4.65210000  | 1.26410000  | 4.98330000  |
|    |        |              | C  | 4.25850000  | 3.63540000  | 4.45060000  |
|    |        |              | C  | 3.26140000  | 1.90900000  | 2.96830000  |
|    |        |              | C  | 3.60510000  | 0.73390000  | 2.06440000  |
|    |        |              | C  | 2.48190000  | 0.50430000  | 1.04570000  |
|    |        |              | C  | 1.15590000  | 0.29260000  | 1.76960000  |
|    |        |              | C  | 0.82500000  | 1.43050000  | 2.70810000  |
|    |        |              | C  | 1.94650000  | 1.64880000  | 3.67740000  |
|    |        |              | H  | 9.07860000  | 1.06690000  | 5.69980000  |
|    |        |              | H  | 9.05110000  | 2.19190000  | 7.63100000  |
|    |        |              | H  | 7.05210000  | 2.94520000  | 8.51150000  |
|    |        |              | H  | 5.04080000  | 2.43760000  | 7.28570000  |
|    |        |              | H  | 4.54990000  | 0.40250000  | 4.70460000  |
|    |        |              | H  | 3.92670000  | 1.32390000  | 5.59870000  |
|    |        |              | H  | 5.18980000  | 2.25980000  | 3.35060000  |
|    |        |              | H  | 3.45520000  | 3.71940000  | 4.92290000  |
|    |        |              | H  | 4.99840000  | 3.80990000  | 5.04870000  |
|    |        |              | H  | 4.24300000  | 4.25610000  | 3.61320000  |
|    |        |              | H  | 3.13500000  | 2.66070000  | 2.40600000  |
|    |        |              | H  | 3.71550000  | -0.04360000 | 2.57490000  |
|    |        |              | H  | 4.40320000  | 0.92950000  | 1.58220000  |
|    |        |              | H  | 2.40610000  | -0.52700000 | 0.26880000  |
|    |        |              | H  | 2.39480000  | 1.27210000  | 0.48710000  |
|    |        |              | H  | 0.62920000  | 0.27320000  | 0.95450000  |
|    |        |              | H  | 1.23170000  | -0.52530000 | 2.27150000  |
|    |        |              | H  | 0.73480000  | 2.23230000  | 2.18640000  |
|    |        |              | H  | 0.04570000  | 1.25270000  | 3.17180000  |
|    |        |              | H  | 1.73410000  | 2.38260000  | 4.21870000  |
|    |        |              | H  | 2.02840000  | 0.85990000  | 4.19900000  |
|    |        |              | Br | 7.21290000  | 2.46230000  | 2.20000000  |

**Table S10.** CSD refcodes of the starting structures, energies (in Hartree) and coordinates of the optimized structures containing Se...Br contacts (from calculation with CH<sub>2</sub>Cl<sub>2</sub> as a medium)

|    | CSD refcode | E(RM062X)    | Coordinates |             |             |             |
|----|-------------|--------------|-------------|-------------|-------------|-------------|
| 1  | ACIMOP      | -5668.533717 | C           | 3.25004200  | -2.12783800 | -0.10579700 |
|    |             |              | H           | 2.94671500  | -2.73620400 | 0.74411500  |
|    |             |              | H           | 4.32932000  | -1.98411300 | -0.08689000 |
|    |             |              | H           | 2.95941000  | -2.61993600 | -1.03184700 |
|    |             |              | C           | 2.94540300  | 0.48183800  | -1.40263400 |
|    |             |              | H           | 2.44562800  | 1.44733700  | -1.34287900 |
|    |             |              | H           | 2.66551000  | -0.01942500 | -2.32673200 |
|    |             |              | H           | 4.02486800  | 0.62577400  | -1.36456600 |
|    |             |              | C           | 2.98512300  | 0.30591200  | 1.49274200  |
|    |             |              | H           | 2.73047500  | -0.30425600 | 2.35679800  |
|    |             |              | H           | 2.48554800  | 1.27077500  | 1.56398900  |
|    |             |              | H           | 4.06355700  | 0.45490500  | 1.44260500  |
|    |             |              | C           | -0.19811800 | 0.94896000  | 0.00108900  |
|    |             |              | C           | -0.40027000 | 1.60309100  | -1.20800600 |
|    |             |              | H           | -0.29641600 | 1.06545900  | -2.14059600 |
|    |             |              | C           | -0.35459400 | 1.61773500  | 1.20867500  |
|    |             |              | H           | -0.21851500 | 1.09138000  | 2.14364200  |
|    |             |              | C           | -0.74933200 | 2.94664900  | -1.20473700 |
|    |             |              | H           | -0.91130600 | 3.45893200  | -2.14313400 |
|    |             |              | C           | -0.89839600 | 3.62554600  | -0.00225200 |
|    |             |              | H           | -1.17496000 | 4.67096100  | -0.00366600 |
|    |             |              | C           | -0.70319500 | 2.96195500  | 1.20172500  |
|    |             |              | H           | -0.82953400 | 3.48606500  | 2.13905500  |
| Br | -3.01606000 | -1.27536200  | 0.00703600  |             |             |             |
| Se | 0.24748400  | -0.92812900  | -0.00067800 |             |             |             |
| P  | 2.44449200  | -0.52644500  | -0.00386200 |             |             |             |
| 2  | ACINEG      | -6243.712125 | C           | -1.56148600 | 0.74890000  | 1.48142900  |
|    |             |              | C           | -2.43141100 | 1.83773300  | 1.42035100  |
|    |             |              | C           | -2.86181500 | 2.43806800  | 2.59457700  |
|    |             |              | C           | -2.43096100 | 1.95438600  | 3.82250400  |
|    |             |              | C           | -1.57080700 | 0.86487000  | 3.88327300  |
|    |             |              | C           | -1.13430700 | 0.25970900  | 2.71568100  |
|    |             |              | C           | -2.18329900 | -1.49209000 | -0.29001700 |
|    |             |              | C           | -3.42219400 | -1.52059100 | 0.34899600  |
|    |             |              | C           | -4.28850400 | -2.57864900 | 0.11774800  |
|    |             |              | C           | -3.92183700 | -3.60384300 | -0.74354100 |
|    |             |              | C           | -2.68637600 | -3.57728100 | -1.37787200 |
|    |             |              | C           | -1.81298800 | -2.52472800 | -1.15365400 |
|    |             |              | C           | -1.17820400 | 1.04803700  | -1.39480900 |
|    |             |              | C           | -1.75343700 | 0.65351500  | -2.60175000 |
|    |             |              | C           | -1.78318300 | 1.53775700  | -3.67011000 |
|    |             |              | C           | -1.24135700 | 2.80872100  | -3.53721800 |
|    |             |              | C           | -0.66831000 | 3.20285600  | -2.33424000 |
|    |             |              | C           | -0.63149800 | 2.32693600  | -1.26197800 |
|    |             |              | C           | 1.85554500  | 0.69188700  | 0.06916200  |
|    |             |              | C           | 1.95032600  | 1.47756400  | 1.21087900  |
|    |             |              | C           | 2.54308300  | 2.73101900  | 1.12531700  |
|    |             |              | C           | 3.04570200  | 3.18294000  | -0.08803100 |
|    |             |              | H           | 3.50901300  | 4.15819300  | -0.14999300 |
|    |             |              | C           | 2.96428400  | 2.38070100  | -1.21935600 |
|    |             |              | C           | 2.36542000  | 1.13144500  | -1.14562000 |
|    |             |              | P           | -1.06571600 | -0.10771000 | -0.02199700 |
|    |             |              | Se          | 0.98728100  | -1.02531800 | 0.14872800  |
| Br | 3.99366300  | -2.16198600  | 0.27076900  |             |             |             |
| H  | -2.77451700 | 2.21503600   | 0.46658500  |             |             |             |
| H  | -3.53328300 | 3.28390500   | 2.54745900  |             |             |             |
| H  | -2.76534300 | 2.42810500   | 4.73530100  |             |             |             |
| H  | -1.23567200 | 0.48797700   | 4.83931300  |             |             |             |

|   |        |              |    |             |             |             |
|---|--------|--------------|----|-------------|-------------|-------------|
|   |        |              | H  | -0.45962000 | -0.58541200 | 2.76261400  |
|   |        |              | H  | -3.70865200 | -0.72830500 | 1.02742600  |
|   |        |              | H  | -5.24795900 | -2.60234600 | 0.61509200  |
|   |        |              | H  | -4.59884500 | -4.42885900 | -0.91795300 |
|   |        |              | H  | -2.39896300 | -4.37755000 | -2.04511400 |
|   |        |              | H  | -0.85094200 | -2.50904600 | -1.64924600 |
|   |        |              | H  | -2.18286900 | -0.33303800 | -2.70995900 |
|   |        |              | H  | -2.23325200 | 1.23216200  | -4.60417400 |
|   |        |              | H  | -1.26661900 | 3.49535500  | -4.37232200 |
|   |        |              | H  | -0.24482000 | 4.19209300  | -2.22985200 |
|   |        |              | H  | -0.17895400 | 2.63915100  | -0.32856000 |
|   |        |              | H  | 1.56705500  | 1.11812900  | 2.15594200  |
|   |        |              | H  | 2.61649800  | 3.34899700  | 2.00966200  |
|   |        |              | H  | 3.36280400  | 2.72784200  | -2.16280500 |
|   |        |              | H  | 2.29061700  | 0.50441400  | -2.02346500 |
| 3 | ADUQUN | -8180.778678 | Se | -2.58803700 | -1.08023100 | 0.01269000  |
|   |        |              | Br | -4.94996200 | -1.60064000 | -0.08080300 |
|   |        |              | Br | 6.58441100  | -0.77061500 | -0.02758000 |
|   |        |              | O  | -0.39782400 | -0.47584600 | 0.08180300  |
|   |        |              | N  | 0.90461400  | 1.37885700  | 0.03274800  |
|   |        |              | H  | 0.88554000  | 2.38271100  | -0.04078100 |
|   |        |              | C  | -2.72540000 | 0.83517500  | 0.02216700  |
|   |        |              | C  | -1.52413200 | 1.56066900  | 0.05258500  |
|   |        |              | C  | 3.76021400  | -0.99702000 | 0.25235800  |
|   |        |              | H  | 3.95902100  | -2.04172900 | 0.44307200  |
|   |        |              | C  | -0.28724700 | 0.75804400  | 0.05918500  |
|   |        |              | C  | -3.93218700 | 1.52832200  | 0.00655200  |
|   |        |              | H  | -4.86745500 | 0.99238800  | -0.01985800 |
|   |        |              | C  | -1.55124100 | 2.95535300  | 0.07977400  |
|   |        |              | H  | -0.63633500 | 3.53074100  | 0.12073500  |
|   |        |              | C  | 2.19494300  | 0.81238800  | 0.02320300  |
|   |        |              | C  | 2.45168500  | -0.53433600 | 0.26937200  |
|   |        |              | H  | 1.64703400  | -1.21895700 | 0.47339300  |
|   |        |              | C  | 4.55922700  | 1.21957500  | -0.24561600 |
|   |        |              | H  | 5.37459600  | 1.89970500  | -0.44435700 |
|   |        |              | C  | -2.75267600 | 3.63445900  | 0.06667600  |
|   |        |              | H  | -2.76609900 | 4.71444500  | 0.08913800  |
|   |        |              | C  | -3.94018600 | 2.91263600  | 0.02693600  |
|   |        |              | H  | -4.88843900 | 3.43267000  | 0.01511300  |
|   |        |              | C  | 4.80217100  | -0.12393200 | -0.00473500 |
|   |        |              | C  | 3.25623200  | 1.68124900  | -0.23120900 |
|   |        |              | H  | 3.06154200  | 2.72907800  | -0.42166800 |
| 4 | CALROW | -15557.30359 | Se | -1.72495300 | -0.19705700 | 0.18709000  |
|   |        |              | Br | -1.75260500 | 2.35634300  | 0.46117900  |
|   |        |              | Br | -1.91009300 | -2.72372500 | -0.38028200 |
|   |        |              | N  | -3.27548100 | -0.11975000 | -2.14030000 |
|   |        |              | H  | -2.40988700 | -0.45658300 | -2.52801700 |
|   |        |              | H  | -4.08251300 | -0.12604900 | -2.74464400 |
|   |        |              | N  | -4.50285400 | 0.35558000  | -0.26583200 |
|   |        |              | C  | -3.36906200 | 0.03251600  | -0.82837600 |
|   |        |              | C  | -5.67149000 | 0.61451600  | -1.10882500 |
|   |        |              | H  | -5.99362900 | -0.30236400 | -1.60324600 |
|   |        |              | H  | -5.43607700 | 1.37704700  | -1.85134900 |
|   |        |              | H  | -6.47536000 | 0.97538600  | -0.47796600 |
|   |        |              | C  | -4.69573200 | 0.55344600  | 1.16899500  |
|   |        |              | H  | -3.83918500 | 0.18606800  | 1.71969300  |
|   |        |              | H  | -5.58655100 | 0.00637100  | 1.46861400  |
|   |        |              | H  | -4.83050900 | 1.61553200  | 1.36737800  |
|   |        |              | Se | 3.09578300  | -0.23075000 | 0.74574900  |
|   |        |              | Br | 1.02734400  | -0.42769800 | 2.29612300  |
|   |        |              | Br | 4.79924500  | 0.09246400  | -1.15625600 |
|   |        |              | N  | 1.30749800  | -1.25731100 | -1.11781200 |
|   |        |              | H  | 1.62397600  | -2.10861800 | -0.68257200 |

|   |         |              |    |             |             |             |
|---|---------|--------------|----|-------------|-------------|-------------|
|   |         |              | H  | 0.45855500  | -1.31764600 | -1.66157500 |
|   |         |              | N  | 1.40095300  | 1.05303900  | -1.13067800 |
|   |         |              | C  | 1.77069000  | -0.10734100 | -0.65849400 |
|   |         |              | C  | 0.59634500  | 1.17462200  | -2.34486400 |
|   |         |              | H  | 0.64608400  | 0.26234500  | -2.93193600 |
|   |         |              | H  | -0.43529700 | 1.41096200  | -2.08514300 |
|   |         |              | H  | 1.01205500  | 1.98520200  | -2.93887300 |
|   |         |              | C  | 1.82627100  | 2.31814500  | -0.52357900 |
|   |         |              | H  | 1.73593400  | 2.26041200  | 0.55666600  |
|   |         |              | H  | 2.85476300  | 2.53930300  | -0.80811000 |
|   |         |              | H  | 1.16027700  | 3.09328900  | -0.88894600 |
| 5 | CIDXOD  | -7876.924274 | C  | -0.08602000 | 0.87111300  | -0.37280200 |
|   |         |              | C  | 0.14873400  | 1.66022700  | 0.75822400  |
|   |         |              | C  | 0.30545100  | 3.03336500  | 0.60206800  |
|   |         |              | H  | 0.48070200  | 3.64969400  | 1.47489100  |
|   |         |              | C  | 0.23142000  | 3.61909500  | -0.65402500 |
|   |         |              | H  | 0.35267500  | 4.68837700  | -0.75750700 |
|   |         |              | C  | -0.00136000 | 2.82971600  | -1.76993700 |
|   |         |              | H  | -0.06171100 | 3.27814400  | -2.75202100 |
|   |         |              | C  | -0.16075300 | 1.45767300  | -1.62861200 |
|   |         |              | H  | -0.34493600 | 0.83741100  | -2.49482600 |
|   |         |              | C  | 0.24316300  | 1.06067600  | 2.13160700  |
|   |         |              | H  | -0.50324000 | 0.28665900  | 2.28643400  |
|   |         |              | H  | 0.14306000  | 1.82024000  | 2.90114500  |
|   |         |              | N  | 1.58385300  | 0.41024500  | 2.32618400  |
|   |         |              | Se | -0.32434300 | -1.03721900 | -0.22716700 |
|   |         |              | Br | -2.76251300 | -0.76881200 | 0.11835800  |
|   |         |              | Br | 2.47770800  | -1.23449700 | -0.42427400 |
|   |         |              | H  | 1.80987300  | -0.23643300 | 1.54195400  |
|   |         |              | H  | 1.62199000  | -0.11461600 | 3.19943000  |
|   |         |              | H  | 2.32666000  | 1.10888700  | 2.34880600  |
| 6 | ECIYIA2 | -21630.82416 | C  | 3.90175500  | -0.00331400 | 0.06004000  |
|   |         |              | C  | 4.43189800  | 0.67277400  | -1.02549600 |
|   |         |              | H  | 3.85665600  | 0.82283900  | -1.92791800 |
|   |         |              | C  | 5.72240200  | 1.16596700  | -0.93878800 |
|   |         |              | H  | 6.16512900  | 1.68821200  | -1.77408700 |
|   |         |              | C  | 6.44128800  | 0.98978100  | 0.23580400  |
|   |         |              | C  | 5.89886000  | 0.32543200  | 1.32530100  |
|   |         |              | H  | 6.47530800  | 0.19944800  | 2.22983400  |
|   |         |              | C  | 4.61369100  | -0.18525400 | 1.23610300  |
|   |         |              | H  | 4.19128900  | -0.72345400 | 2.07319200  |
|   |         |              | Se | 2.07659600  | -0.64159200 | 0.06795400  |
|   |         |              | Br | 1.76352400  | -1.13289100 | -2.16348000 |
|   |         |              | Br | 2.81897800  | -3.00203500 | 0.58709000  |
|   |         |              | Br | 1.23024800  | 1.77930300  | -0.29219000 |
|   |         |              | Cl | 8.04977600  | 1.61090300  | 0.34050400  |
|   |         |              | C  | -3.90177700 | 0.00339000  | -0.06001000 |
|   |         |              | C  | -4.43176200 | -0.67211700 | 1.02595200  |
|   |         |              | H  | -3.85642300 | -0.82154000 | 1.92842200  |
|   |         |              | C  | -5.72223500 | -1.16545400 | 0.93965300  |
|   |         |              | H  | -6.16485700 | -1.68721400 | 1.77530900  |
|   |         |              | C  | -6.44120600 | -0.99008100 | -0.23501100 |
|   |         |              | C  | -5.89891300 | -0.32636100 | -1.32495700 |
|   |         |              | H  | -6.47542500 | -0.20101500 | -2.22953800 |
|   |         |              | C  | -4.61381400 | 0.18457300  | -1.23613400 |
|   |         |              | H  | -4.19152900 | 0.72229500  | -2.07358500 |
|   |         |              | Se | -2.07664500 | 0.64169500  | -0.06827900 |
|   |         |              | Br | -1.76350500 | 1.13285900  | 2.16316600  |
|   |         |              | Br | -2.81905200 | 3.00223300  | -0.58716800 |
|   |         |              | Br | -1.23024900 | -1.77918400 | 0.29181100  |
|   |         |              | Cl | -8.04963400 | -1.61144000 | -0.33923200 |
| 7 | ECIYUM2 | -20910.12638 | C  | 3.90639700  | -0.33148800 | -0.43066900 |
|   |         |              | C  | 4.93300200  | 0.05651500  | 0.41608900  |

|   |         |              |    |             |             |             |
|---|---------|--------------|----|-------------|-------------|-------------|
|   |         |              | H  | 4.76736800  | 0.78350200  | 1.19862000  |
|   |         |              | C  | 6.18785500  | -0.49975300 | 0.24314000  |
|   |         |              | H  | 7.01483600  | -0.23525600 | 0.88569900  |
|   |         |              | C  | 6.37378800  | -1.40803500 | -0.78448300 |
|   |         |              | C  | 5.35967400  | -1.78928900 | -1.64201600 |
|   |         |              | H  | 5.55475600  | -2.50350000 | -2.42837800 |
|   |         |              | C  | 4.09881500  | -1.24570100 | -1.45695700 |
|   |         |              | H  | 3.28383300  | -1.54648300 | -2.09993300 |
|   |         |              | Br | 1.03794600  | -1.89279000 | -0.12868000 |
|   |         |              | Br | 1.95028200  | 0.78574100  | 1.95134000  |
|   |         |              | Br | 3.09565000  | 2.76418100  | -0.68075400 |
|   |         |              | F  | 7.58734500  | -1.94007600 | -0.95255000 |
|   |         |              | Se | 2.15357500  | 0.46849800  | -0.32517600 |
|   |         |              | C  | -3.90814600 | 0.27368300  | -0.43446000 |
|   |         |              | C  | -4.61626500 | -0.09684700 | -1.56922700 |
|   |         |              | H  | -4.23826700 | -0.85037700 | -2.24588400 |
|   |         |              | C  | -5.83689900 | 0.50657700  | -1.82434600 |
|   |         |              | H  | -6.42103300 | 0.24879000  | -2.69548200 |
|   |         |              | C  | -6.30692300 | 1.44740500  | -0.92806900 |
|   |         |              | C  | -5.60706000 | 1.82008500  | 0.20593600  |
|   |         |              | H  | -6.01807900 | 2.56232800  | 0.87445500  |
|   |         |              | C  | -4.37979500 | 1.22945400  | 0.45134300  |
|   |         |              | H  | -3.80497800 | 1.51962200  | 1.31933400  |
|   |         |              | Br | -3.11976000 | -2.86589500 | -0.29460900 |
|   |         |              | Br | -1.95518000 | -0.57096600 | 2.06428900  |
|   |         |              | Br | -1.06556800 | 1.81984100  | -0.34763800 |
|   |         |              | F  | -7.48928700 | 2.02199900  | -1.16549700 |
|   |         |              | Se | -2.16138600 | -0.52424700 | -0.23252700 |
| 8 | GIHDAF  | -10447.25115 | Br | 5.09666300  | 1.74337300  | -0.07902500 |
|   |         |              | Se | 3.86082300  | -1.36815900 | 0.18920100  |
|   |         |              | N  | 2.44508400  | -4.02252900 | 0.36364600  |
|   |         |              | C  | 1.24168700  | -0.32454800 | -0.53181900 |
|   |         |              | C  | 2.57811100  | -0.61582000 | -1.12634100 |
|   |         |              | H  | 3.10157000  | 0.28636800  | -1.43267100 |
|   |         |              | H  | 2.52864300  | -1.32393000 | -1.94782400 |
|   |         |              | C  | 1.05237800  | 0.82485800  | 0.23304700  |
|   |         |              | H  | 1.88976100  | 1.49510700  | 0.39230400  |
|   |         |              | C  | 2.97773200  | -3.00384800 | 0.28680500  |
|   |         |              | C  | -0.18704700 | 1.10305000  | 0.78575100  |
|   |         |              | H  | -0.32537900 | 1.99946800  | 1.37774400  |
|   |         |              | Se | -3.83124400 | 1.39569200  | -0.12946900 |
|   |         |              | N  | -2.37660800 | 4.03425200  | -0.09258100 |
|   |         |              | C  | -1.26175000 | 0.23713200  | 0.58703800  |
|   |         |              | C  | -2.60053700 | 0.53646400  | 1.17154100  |
|   |         |              | H  | -3.15551400 | -0.36380700 | 1.42246300  |
|   |         |              | H  | -2.54854000 | 1.20146900  | 2.02819600  |
|   |         |              | C  | -1.07260500 | -0.91239400 | -0.17673400 |
|   |         |              | H  | -1.91106700 | -1.58049500 | -0.34021100 |
|   |         |              | C  | -2.92408400 | 3.02052600  | -0.09485200 |
|   |         |              | C  | 0.16866200  | -1.19213200 | -0.72693500 |
|   |         |              | H  | 0.30774300  | -2.08972800 | -1.31701000 |
|   |         |              | Br | -5.13116300 | -1.70572600 | -0.10829900 |
| 9 | HOCDOS2 | -11064.32501 | Se | -2.24513200 | -0.68214200 | 0.24383100  |
|   |         |              | Br | -0.96820400 | 1.53895400  | 1.32843100  |
|   |         |              | O  | -5.13222900 | -3.39068100 | -0.39575000 |
|   |         |              | N  | -3.24929500 | -2.22891300 | -0.44591200 |
|   |         |              | C  | -3.90061900 | -0.35461200 | 1.15153800  |
|   |         |              | C  | -4.19492000 | 0.70805100  | 2.00328500  |
|   |         |              | H  | -3.45138700 | 1.46129100  | 2.21185600  |
|   |         |              | C  | -5.45216600 | 0.78062100  | 2.57767200  |
|   |         |              | H  | -5.67471600 | 1.60760500  | 3.23864100  |
|   |         |              | C  | -6.43643100 | -0.18035800 | 2.32816000  |
|   |         |              | H  | -7.40777100 | -0.09349500 | 2.79346600  |

|    |        |              |    |             |             |             |
|----|--------|--------------|----|-------------|-------------|-------------|
|    |        |              | C  | -6.16107200 | -1.23560100 | 1.48664100  |
|    |        |              | H  | -6.89862900 | -1.99614500 | 1.26960700  |
|    |        |              | C  | -4.89586300 | -1.31437300 | 0.90410500  |
|    |        |              | C  | -4.44992100 | -2.33676500 | 0.00811300  |
|    |        |              | C  | -4.28831900 | -4.08667800 | -1.35474400 |
|    |        |              | H  | -4.75887600 | -3.99000000 | -2.33052300 |
|    |        |              | H  | -4.24374200 | -5.13055500 | -1.05846000 |
|    |        |              | C  | -2.90203200 | -3.38432100 | -1.29849900 |
|    |        |              | C  | -1.84844700 | -4.23370600 | -0.60040800 |
|    |        |              | H  | -0.92520800 | -3.66518800 | -0.48669000 |
|    |        |              | H  | -2.19792200 | -4.55067900 | 0.38231700  |
|    |        |              | H  | -1.63963200 | -5.11857900 | -1.20170000 |
|    |        |              | C  | -2.43749900 | -2.91964800 | -2.66929700 |
|    |        |              | H  | -1.49431200 | -2.38039100 | -2.58192800 |
|    |        |              | H  | -2.28202700 | -3.78638600 | -3.31192200 |
|    |        |              | H  | -3.18219700 | -2.27038600 | -3.12858400 |
|    |        |              | Se | 2.24513200  | 0.68214200  | -0.24383100 |
|    |        |              | Br | 0.96820400  | -1.53895400 | -1.32843100 |
|    |        |              | O  | 5.13222900  | 3.39068100  | 0.39575000  |
|    |        |              | N  | 3.24929500  | 2.22891300  | 0.44591200  |
|    |        |              | C  | 3.90061900  | 0.35461200  | -1.15153800 |
|    |        |              | C  | 4.19492000  | -0.70805100 | -2.00328500 |
|    |        |              | H  | 3.45138700  | -1.46129100 | -2.21185600 |
|    |        |              | C  | 5.45216600  | -0.78062100 | -2.57767200 |
|    |        |              | H  | 5.67471600  | -1.60760500 | -3.23864100 |
|    |        |              | C  | 6.43643100  | 0.18035800  | -2.32816000 |
|    |        |              | H  | 7.40777100  | 0.09349500  | -2.79346600 |
|    |        |              | C  | 6.16107200  | 1.23560100  | -1.48664100 |
|    |        |              | H  | 6.89862900  | 1.99614500  | -1.26960700 |
|    |        |              | C  | 4.89586300  | 1.31437300  | -0.90410500 |
|    |        |              | C  | 4.44992100  | 2.33676500  | -0.00811300 |
|    |        |              | C  | 4.28831900  | 4.08667800  | 1.35474400  |
|    |        |              | H  | 4.75887600  | 3.99000000  | 2.33052300  |
|    |        |              | H  | 4.24374200  | 5.13055500  | 1.05846000  |
|    |        |              | C  | 2.90203200  | 3.38432100  | 1.29849900  |
|    |        |              | C  | 1.84844700  | 4.23370600  | 0.60040800  |
|    |        |              | H  | 0.92520800  | 3.66518800  | 0.48669000  |
|    |        |              | H  | 2.19792200  | 4.55067900  | -0.38231700 |
|    |        |              | H  | 1.63963200  | 5.11857900  | 1.20170000  |
|    |        |              | C  | 2.43749900  | 2.91964800  | 2.66929700  |
|    |        |              | H  | 1.49431200  | 2.38039100  | 2.58192800  |
|    |        |              | H  | 2.28202700  | 3.78638600  | 3.31192200  |
|    |        |              | H  | 3.18219700  | 2.27038600  | 3.12858400  |
| 10 | IWODUU | -5459.320549 | Br | -2.79899400 | -1.32256300 | -0.13350900 |
|    |        |              | C  | -0.46154600 | 1.08110000  | -0.00934100 |
|    |        |              | C  | 0.67366800  | 1.79024400  | -0.40218800 |
|    |        |              | C  | 0.67315500  | 3.17560500  | -0.36177500 |
|    |        |              | H  | 1.56211300  | 3.71728300  | -0.65977600 |
|    |        |              | C  | -0.46040300 | 3.86023800  | 0.05675700  |
|    |        |              | H  | -0.46077000 | 4.94103200  | 0.08526600  |
|    |        |              | C  | -1.58567000 | 3.14911700  | 0.44765000  |
|    |        |              | H  | -2.46892400 | 3.67439800  | 0.78507600  |
|    |        |              | C  | -1.59167400 | 1.75898900  | 0.42217700  |
|    |        |              | H  | -2.47038000 | 1.21369200  | 0.73172700  |
|    |        |              | C  | 1.84703800  | 0.98152500  | -0.87113600 |
|    |        |              | H  | 1.72470600  | 0.72746400  | -1.92675700 |
|    |        |              | H  | 2.78644600  | 1.52527300  | -0.75217700 |
|    |        |              | C  | 2.36052900  | -0.04666300 | 1.26856800  |
|    |        |              | H  | 1.68195700  | 0.67470000  | 1.72297100  |
|    |        |              | H  | 3.34253300  | 0.43013200  | 1.20204600  |
|    |        |              | C  | 2.43816200  | -1.30168200 | 2.11563400  |
|    |        |              | H  | 1.48885500  | -1.83563200 | 2.11635900  |
|    |        |              | H  | 2.66579700  | -1.01583700 | 3.14104400  |



|    |        |              |    |             |             |             |
|----|--------|--------------|----|-------------|-------------|-------------|
|    |        |              | H  | 3.22258000  | -1.97724100 | 1.77783800  |
|    |        |              | C  | 2.57606300  | -1.36569600 | -0.82103900 |
|    |        |              | H  | 2.10562700  | -1.45507200 | -1.79941000 |
|    |        |              | H  | 2.37752200  | -2.29294500 | -0.28521500 |
|    |        |              | C  | 4.07124600  | -1.13749700 | -0.96622900 |
|    |        |              | H  | 4.28416100  | -0.21280300 | -1.50196100 |
|    |        |              | H  | 4.50010800  | -1.95947400 | -1.53691500 |
|    |        |              | H  | 4.57448500  | -1.10339100 | -0.00069100 |
|    |        |              | N  | 1.86351200  | -0.28049600 | -0.11102600 |
|    |        |              | Se | -0.27176500 | -0.83735600 | -0.08599700 |
| 11 | KUSSOH | -5553.976918 | Br | 3.76929700  | 0.18193100  | -0.37672400 |
|    |        |              | C  | -1.67189000 | -0.25123100 | -0.04986200 |
|    |        |              | C  | -2.55855600 | 0.71137000  | -0.49653100 |
|    |        |              | C  | -2.02904200 | -1.57548700 | 0.11684200  |
|    |        |              | C  | -0.94524100 | -2.45993400 | 0.66709400  |
|    |        |              | H  | -0.99784800 | -2.46513200 | 1.75737600  |
|    |        |              | H  | -1.02023000 | -3.49030300 | 0.31442000  |
|    |        |              | C  | -1.96942700 | 2.08060200  | -0.70244900 |
|    |        |              | H  | -1.58426700 | 2.15948500  | -1.72090500 |
|    |        |              | H  | -2.69745100 | 2.87997000  | -0.54721900 |
|    |        |              | C  | -1.29120900 | 2.58535300  | 1.57343500  |
|    |        |              | H  | -1.76456400 | 3.56966200  | 1.56425600  |
|    |        |              | H  | -0.43950000 | 2.59516000  | 2.24886900  |
|    |        |              | H  | -2.00942800 | 1.83993900  | 1.90942000  |
|    |        |              | C  | 0.15804900  | 3.21352100  | -0.26165800 |
|    |        |              | H  | 0.52264500  | 2.90269900  | -1.23757000 |
|    |        |              | H  | 0.99261000  | 3.24593000  | 0.43577500  |
|    |        |              | H  | -0.29306300 | 4.20516200  | -0.33216500 |
|    |        |              | C  | 0.73530400  | -2.27376900 | -1.09069100 |
|    |        |              | H  | 1.65815800  | -1.76040000 | -1.35348400 |
|    |        |              | H  | -0.06204500 | -1.97544600 | -1.76867700 |
|    |        |              | H  | 0.87609700  | -3.35509100 | -1.14343500 |
|    |        |              | C  | 1.42992200  | -2.28646500 | 1.22832300  |
|    |        |              | H  | 1.53441000  | -3.37297200 | 1.22538800  |
|    |        |              | H  | 1.16472300  | -1.94510700 | 2.22604700  |
|    |        |              | H  | 2.36060600  | -1.81748100 | 0.91454000  |
|    |        |              | C  | -3.33171600 | -1.95428300 | -0.17523800 |
|    |        |              | H  | -3.63723600 | -2.98582700 | -0.05654600 |
|    |        |              | C  | -4.24468400 | -0.99834900 | -0.61037300 |
|    |        |              | H  | -5.26133600 | -1.29263300 | -0.83059800 |
|    |        |              | C  | -3.86501200 | 0.33146900  | -0.76900200 |
|    |        |              | H  | -4.58218800 | 1.06488500  | -1.11467100 |
|    |        |              | N  | -0.82811900 | 2.23805800  | 0.22138600  |
|    |        |              | N  | 0.36787600  | -1.89100400 | 0.28614200  |
|    |        |              | Se | 0.11874200  | 0.24893400  | 0.31066200  |
| 12 | PEBPUH | -15126.03856 | Br | -3.92724600 | -1.27565300 | 0.30909400  |
|    |        |              | Se | -1.14864600 | 1.20054500  | 0.74196500  |
|    |        |              | Se | -2.36443300 | -0.05921300 | -0.86783200 |
|    |        |              | C  | -2.19757500 | 2.73107800  | 0.78252200  |
|    |        |              | C  | -3.69550400 | 1.31197800  | -1.25836100 |
|    |        |              | N  | -2.79686000 | 3.70755100  | 0.87686700  |
|    |        |              | N  | -4.45016700 | 2.08556900  | -1.64619900 |
|    |        |              | Br | -0.39322400 | -1.75045700 | 0.00225500  |
|    |        |              | Se | 5.06180400  | -0.06356100 | 0.03762700  |
|    |        |              | Se | 2.83513800  | -0.81308800 | -0.12914600 |
|    |        |              | C  | 4.88562000  | 1.43667400  | -1.02757800 |
|    |        |              | C  | 2.17767400  | 0.18862500  | 1.28098200  |
|    |        |              | N  | 4.81377300  | 2.37927900  | -1.68224900 |
|    |        |              | N  | 1.73951100  | 0.81395500  | 2.14137200  |
| 13 | RAGSAT | -10586.0226  | Se | -0.00646900 | 1.70192600  | 0.91513300  |
|    |        |              | Br | 5.14582200  | -2.15621000 | -0.21902700 |
|    |        |              | Br | -5.14270000 | -2.09391300 | -0.35833800 |
|    |        |              | Br | 0.00258800  | 3.11673700  | -0.90856800 |

|    |        |              |    |             |             |             |
|----|--------|--------------|----|-------------|-------------|-------------|
|    |        |              | C  | 1.47575400  | 0.56057900  | 0.47206700  |
|    |        |              | C  | 2.64277700  | 1.12455000  | -0.02196700 |
|    |        |              | H  | 2.70942000  | 2.17772000  | -0.25652900 |
|    |        |              | C  | 3.73973500  | 0.30624400  | -0.23205300 |
|    |        |              | H  | 4.65506300  | 0.72035200  | -0.62805700 |
|    |        |              | C  | 3.64966000  | -1.04623700 | 0.06967600  |
|    |        |              | C  | 2.48430600  | -1.59924500 | 0.57944700  |
|    |        |              | H  | 2.43106100  | -2.65272600 | 0.81064000  |
|    |        |              | C  | 1.37959100  | -0.78807300 | 0.78681100  |
|    |        |              | H  | 0.47113400  | -1.21697900 | 1.18571500  |
|    |        |              | C  | -1.47739800 | 0.56888700  | 0.50040400  |
|    |        |              | C  | -2.53259000 | 0.57682500  | 1.40215400  |
|    |        |              | H  | -2.50803000 | 1.19137700  | 2.29144000  |
|    |        |              | C  | -3.63256300 | -0.22794200 | 1.14556300  |
|    |        |              | H  | -4.46502700 | -0.24542500 | 1.83296700  |
|    |        |              | C  | -3.64846300 | -1.00388800 | -0.00341900 |
|    |        |              | C  | -2.58947700 | -0.99816400 | -0.90799500 |
|    |        |              | H  | -2.62804600 | -1.60766400 | -1.79843800 |
|    |        |              | C  | -1.48885900 | -0.20307200 | -0.65615700 |
|    |        |              | H  | -0.66031300 | -0.18642600 | -1.35176600 |
| 14 | TAJMEW | -10408.88215 | Se | 1.16351200  | -1.15389000 | 0.26547200  |
|    |        |              | Se | -1.16490000 | -1.15334900 | -0.26556500 |
|    |        |              | C  | 1.58117800  | 0.26035800  | -0.99171800 |
|    |        |              | N  | 1.74102600  | -0.11872700 | -2.24625500 |
|    |        |              | N  | 1.63505800  | 1.52351700  | -0.64762900 |
|    |        |              | C  | 1.65521800  | 2.00048300  | 0.73167100  |
|    |        |              | C  | 2.00726500  | 2.51389600  | -1.65813400 |
|    |        |              | C  | -1.58125700 | 0.26162600  | 0.99121800  |
|    |        |              | N  | -1.74154400 | -0.11695800 | 2.24582800  |
|    |        |              | N  | -1.63392600 | 1.52475800  | 0.64676300  |
|    |        |              | C  | -2.00555100 | 2.51565300  | 1.65698200  |
|    |        |              | C  | -1.65303400 | 2.00134700  | -0.73268700 |
|    |        |              | H  | 1.71155500  | -1.09927900 | -2.47120500 |
|    |        |              | H  | 2.01824600  | 0.51749100  | -2.97735800 |
|    |        |              | H  | 1.31529400  | 1.22559100  | 1.40805900  |
|    |        |              | H  | 1.00728200  | 2.87234000  | 0.80548400  |
|    |        |              | H  | 2.67789700  | 2.27255400  | 0.99038300  |
|    |        |              | H  | 1.32532800  | 2.46787000  | -2.50664100 |
|    |        |              | H  | 1.94137800  | 3.50038200  | -1.21302600 |
|    |        |              | H  | 3.03289500  | 2.33966100  | -1.98939200 |
|    |        |              | H  | -1.71304900 | -1.09746200 | 2.47109100  |
|    |        |              | H  | -2.01765200 | 0.51981000  | 2.97687600  |
|    |        |              | H  | -1.32308400 | 2.47007900  | 2.50509400  |
|    |        |              | H  | -3.03094400 | 2.34151800  | 1.98900600  |
|    |        |              | H  | -1.94007400 | 3.50191400  | 1.21133400  |
|    |        |              | H  | -2.67547100 | 2.27317700  | -0.99245600 |
|    |        |              | H  | -1.00522000 | 2.87331800  | -0.80613600 |
|    |        |              | H  | -1.31219600 | 1.22641300  | -1.40855800 |
|    |        |              | Br | -4.30164100 | -0.38230800 | -0.41787200 |
|    |        |              | Br | 4.30186400  | -0.38248000 | 0.41889100  |
| 15 | TAVWUI | -10561.31011 | Br | 4.32587700  | -0.42391700 | -0.73717900 |
|    |        |              | Br | -4.32116800 | -0.62464100 | 0.60093600  |
|    |        |              | Se | 1.14741600  | -1.10932700 | -0.53868000 |
|    |        |              | Se | -1.15614500 | -1.21598500 | 0.18049100  |
|    |        |              | N  | 1.68270800  | 1.58503500  | 0.33579900  |
|    |        |              | N  | 1.90304500  | 0.15864400  | 1.94384500  |
|    |        |              | N  | -1.68182200 | 1.61917800  | 0.13782300  |
|    |        |              | N  | -1.90413900 | 0.72803400  | -1.81828300 |
|    |        |              | C  | 1.60257200  | 0.28666300  | 0.64823600  |
|    |        |              | C  | 2.20492000  | 1.39276000  | 2.45787500  |
|    |        |              | C  | 2.07251900  | 2.28727200  | 1.44677700  |
|    |        |              | C  | 1.56248900  | 2.13523800  | -1.00871100 |
|    |        |              | C  | 1.97621100  | -1.10885900 | 2.66046200  |

|    |        |             |    |             |             |             |
|----|--------|-------------|----|-------------|-------------|-------------|
|    |        |             | C  | -1.60690700 | 0.46903700  | -0.54166300 |
|    |        |             | C  | -2.19775700 | 2.06022600  | -1.94818000 |
|    |        |             | C  | -2.06359200 | 2.61867400  | -0.71913900 |
|    |        |             | C  | -1.55965700 | 1.75142800  | 1.58442600  |
|    |        |             | C  | -1.97551300 | -0.27146300 | -2.87751300 |
|    |        |             | H  | 2.48309900  | 1.52718300  | 3.48681400  |
|    |        |             | H  | 2.21969500  | 3.35120600  | 1.42307800  |
|    |        |             | H  | 1.56483800  | 3.21725100  | -0.93107900 |
|    |        |             | H  | 0.63400100  | 1.80064100  | -1.46448200 |
|    |        |             | H  | 2.41020700  | 1.79077400  | -1.59861900 |
|    |        |             | H  | 2.29673500  | -0.90314300 | 3.67579600  |
|    |        |             | H  | 2.69851900  | -1.75119700 | 2.16213400  |
|    |        |             | H  | 0.99744000  | -1.58196800 | 2.66926900  |
|    |        |             | H  | -2.47037800 | 2.49283300  | -2.89301000 |
|    |        |             | H  | -2.20646100 | 3.62951700  | -0.38469100 |
|    |        |             | H  | -1.52505600 | 2.80861400  | 1.82559300  |
|    |        |             | H  | -0.64779400 | 1.26609700  | 1.92284100  |
|    |        |             | H  | -2.42385100 | 1.27858700  | 2.04815300  |
|    |        |             | H  | -2.30271300 | 0.22376200  | -3.78504600 |
|    |        |             | H  | -2.69184000 | -1.03709800 | -2.58956800 |
|    |        |             | H  | -0.99468400 | -0.71502500 | -3.02999900 |
| 16 | XATJEH | -8150.88308 | Br | -1.56570300 | -2.81421400 | -0.27814300 |
|    |        |             | Se | -1.15083100 | -0.72579900 | 0.97684100  |
|    |        |             | N  | 1.30205500  | 1.17350700  | -0.55378800 |
|    |        |             | C  | -1.80109100 | 0.34833800  | -0.48568400 |
|    |        |             | C  | -3.14137600 | 0.71069500  | -0.49931300 |
|    |        |             | C  | -3.65095900 | 1.46725000  | -1.54570800 |
|    |        |             | C  | -2.81913700 | 1.86067500  | -2.58285800 |
|    |        |             | C  | -1.47886800 | 1.50105900  | -2.56681000 |
|    |        |             | C  | -0.95179000 | 0.74670900  | -1.52312800 |
|    |        |             | C  | 0.50517800  | 0.37378000  | -1.54611900 |
|    |        |             | C  | 1.34850200  | 2.61063200  | -0.92809100 |
|    |        |             | C  | 2.68195800  | 0.61100300  | -0.27853000 |
|    |        |             | C  | 2.59815800  | -0.61973100 | 0.61505700  |
|    |        |             | C  | 4.01152200  | -1.08398800 | 0.97032100  |
|    |        |             | C  | 4.83899800  | -1.35371900 | -0.28346400 |
|    |        |             | C  | 4.87835100  | -0.12471000 | -1.18738800 |
|    |        |             | C  | 3.46493600  | 0.33224600  | -1.55410100 |
|    |        |             | H  | -3.78486800 | 0.39552800  | 0.31031700  |
|    |        |             | H  | -4.69634700 | 1.74360600  | -1.54910900 |
|    |        |             | H  | -3.20937900 | 2.44599100  | -3.40384600 |
|    |        |             | H  | -0.83037000 | 1.80898300  | -3.37764700 |
|    |        |             | H  | 0.63990400  | -0.67673300 | -1.30000500 |
|    |        |             | H  | 0.93332500  | 0.56934200  | -2.52617400 |
|    |        |             | H  | 0.79512400  | 1.14350400  | 0.35062800  |
|    |        |             | H  | 1.87484500  | 2.71798200  | -1.87213500 |
|    |        |             | H  | 0.33113100  | 2.97833700  | -1.02057400 |
|    |        |             | H  | 1.86153300  | 3.15271400  | -0.13985200 |
|    |        |             | H  | 3.18229800  | 1.40478000  | 0.28091000  |
|    |        |             | H  | 2.07161400  | -1.42780100 | 0.10018200  |
|    |        |             | H  | 2.03124900  | -0.38349900 | 1.51729700  |
|    |        |             | H  | 3.95149500  | -1.97732400 | 1.59118300  |
|    |        |             | H  | 4.50173200  | -0.31123300 | 1.56945300  |
|    |        |             | H  | 5.85149200  | -1.65050300 | -0.00888900 |
|    |        |             | H  | 4.39773000  | -2.19017100 | -0.83364200 |
|    |        |             | H  | 5.39878100  | 0.68916200  | -0.67457800 |
|    |        |             | H  | 5.43637100  | -0.33568500 | -2.09919600 |
|    |        |             | H  | 3.50863500  | 1.21647900  | -2.19116100 |
|    |        |             | H  | 2.97531300  | -0.46386500 | -2.12030500 |
|    |        |             | Br | -0.43755500 | 1.70940200  | 2.23345600  |

**Table S11.** CSD refcodes of the starting structures, energies (in Hartree) and coordinates of the optimized structures containing Se...Br contacts (from calculation in vacuum)

|    | CSD Refcode | E(RM062X)    | Coordinates |             |             |             |
|----|-------------|--------------|-------------|-------------|-------------|-------------|
| 1  | ACIMOP      | -5668.498556 | C           | 2.89475600  | -2.39968100 | 0.48549400  |
|    |             |              | H           | 2.44938000  | -2.72937600 | 1.42304500  |
|    |             |              | H           | 3.97900300  | -2.36197500 | 0.58972500  |
|    |             |              | H           | 2.63154000  | -3.11692700 | -0.29111900 |
|    |             |              | C           | 3.15486500  | -0.26980900 | -1.42543500 |
|    |             |              | H           | 2.88080500  | 0.75148900  | -1.68682000 |
|    |             |              | H           | 2.89761000  | -0.92465800 | -2.25656600 |
|    |             |              | H           | 4.22866100  | -0.31923700 | -1.24014600 |
|    |             |              | C           | 2.80145300  | 0.35276800  | 1.34859200  |
|    |             |              | H           | 2.32903200  | 0.08238800  | 2.29212000  |
|    |             |              | H           | 2.49961100  | 1.36862400  | 1.09283800  |
|    |             |              | H           | 3.88594600  | 0.30532300  | 1.45238600  |
|    |             |              | C           | -0.21364800 | 0.94820900  | -0.04666800 |
|    |             |              | C           | 0.12753000  | 1.65561200  | -1.19247000 |
|    |             |              | H           | 0.31727900  | 1.12245600  | -2.11490800 |
|    |             |              | C           | -0.50948100 | 1.62540500  | 1.13044900  |
|    |             |              | H           | -0.80799200 | 1.06651400  | 2.00712500  |
|    |             |              | C           | 0.20121200  | 3.04297100  | -1.15245700 |
|    |             |              | H           | 0.46255900  | 3.59220100  | -2.04719200 |
|    |             |              | C           | -0.07697600 | 3.72077300  | 0.02573300  |
|    |             |              | H           | -0.02479200 | 4.80066000  | 0.05479700  |
| C  | -0.44063200 | 3.01056200   | 1.16335100  |             |             |             |
| H  | -0.67562100 | 3.53641700   | 2.07902300  |             |             |             |
| Br | -2.83133900 | -0.92332800  | -0.04966600 |             |             |             |
| Se | -0.25907500 | -0.98199100  | -0.06988100 |             |             |             |
| P  | 2.21452800  | -0.77270400  | 0.04936100  |             |             |             |
| 2  | ACINEG      | -6243.684807 | C           | -1.49120400 | 0.56632000  | 1.57522900  |
|    |             |              | C           | -2.33044400 | 1.67289900  | 1.68492800  |
|    |             |              | C           | -2.70705200 | 2.13865300  | 2.93756300  |
|    |             |              | C           | -2.25418100 | 1.50189700  | 4.08419600  |
|    |             |              | C           | -1.41914700 | 0.39666000  | 3.98030200  |
|    |             |              | C           | -1.03357300 | -0.06650400 | 2.73204800  |
|    |             |              | C           | -2.10025500 | -1.50801200 | -0.33322100 |
|    |             |              | C           | -3.32010100 | -1.64162700 | 0.32753600  |
|    |             |              | C           | -4.15221700 | -2.71363800 | 0.04011500  |
|    |             |              | C           | -3.77420100 | -3.65589200 | -0.90707500 |
|    |             |              | C           | -2.55900100 | -3.52978100 | -1.56591800 |
|    |             |              | C           | -1.72028300 | -2.46315100 | -1.27731000 |
|    |             |              | C           | -1.36611500 | 1.13668900  | -1.25614300 |
|    |             |              | C           | -2.22884700 | 0.88929800  | -2.32206400 |
|    |             |              | C           | -2.45205500 | 1.86947800  | -3.27989000 |
|    |             |              | C           | -1.81936800 | 3.09964800  | -3.18081300 |
|    |             |              | C           | -0.95853400 | 3.35161000  | -2.11954900 |
|    |             |              | C           | -0.72680700 | 2.37640800  | -1.16376700 |
|    |             |              | C           | 1.99722600  | 0.69592000  | -0.00610600 |
|    |             |              | C           | 1.97124700  | 1.44207700  | 1.16622700  |
|    |             |              | C           | 2.34999800  | 2.77824900  | 1.14099800  |
|    |             |              | C           | 2.76640500  | 3.36211000  | -0.04828500 |
|    |             |              | H           | 3.06566600  | 4.40153600  | -0.06505700 |
|    |             |              | C           | 2.81101700  | 2.60653500  | -1.21277400 |
|    |             |              | C           | 2.42426900  | 1.27400000  | -1.19508200 |
|    |             |              | P           | -0.96555300 | -0.12832100 | -0.01919700 |
|    |             |              | Se          | 1.41321500  | -1.14121200 | 0.00219400  |
|    |             |              | Br          | 3.79700400  | -1.96427200 | 0.04494800  |
|    |             |              | H           | -2.69032500 | 2.17119300  | 0.79446100  |
|    |             |              | H           | -3.35722200 | 2.99957700  | 3.01547300  |
|    |             |              | H           | -2.54870800 | 1.86778000  | 5.05856000  |
|    |             |              | H           | -1.06112500 | -0.10034200 | 4.87162400  |
|    |             |              | H           | -0.36744000 | -0.91739700 | 2.65007200  |

|   |        |              |    |             |             |             |
|---|--------|--------------|----|-------------|-------------|-------------|
|   |        |              | H  | -3.61736500 | -0.91117500 | 1.06885900  |
|   |        |              | H  | -5.09663200 | -2.81347100 | 0.55778700  |
|   |        |              | H  | -4.42428000 | -4.49193900 | -1.12714700 |
|   |        |              | H  | -2.25796200 | -4.26621300 | -2.29838100 |
|   |        |              | H  | -0.76684700 | -2.37108500 | -1.78329600 |
|   |        |              | H  | -2.73084900 | -0.06552300 | -2.40488900 |
|   |        |              | H  | -3.12481100 | 1.66914300  | -4.10278200 |
|   |        |              | H  | -1.99479700 | 3.86098600  | -3.92885300 |
|   |        |              | H  | -0.45821500 | 4.30719500  | -2.03746500 |
|   |        |              | H  | -0.04858800 | 2.58133800  | -0.34335400 |
|   |        |              | H  | 1.65544600  | 0.98061400  | 2.09205600  |
|   |        |              | H  | 2.32560200  | 3.35912300  | 2.05325800  |
|   |        |              | H  | 3.14290200  | 3.05525700  | -2.13943500 |
|   |        |              | H  | 2.45372300  | 0.67985700  | -2.09816900 |
| 3 | ADUQUN | -8180.767901 | Se | -2.67587800 | -1.09776700 | 0.08139000  |
|   |        |              | Br | -4.99783400 | -1.53551000 | -0.16436700 |
|   |        |              | Br | 6.62438900  | -0.75756900 | -0.03675500 |
|   |        |              | O  | -0.36342000 | -0.51448500 | 0.25418100  |
|   |        |              | N  | 0.92322200  | 1.33388200  | -0.01337000 |
|   |        |              | H  | 0.88609400  | 2.31908900  | -0.20817700 |
|   |        |              | C  | -2.72273300 | 0.82086000  | 0.05443500  |
|   |        |              | C  | -1.50293900 | 1.51798300  | 0.09069700  |
|   |        |              | C  | 3.80476600  | -1.00047100 | 0.27071600  |
|   |        |              | H  | 4.01745200  | -2.03584300 | 0.49469100  |
|   |        |              | C  | -0.26821500 | 0.70248700  | 0.12158500  |
|   |        |              | C  | -3.90931400 | 1.55031900  | 0.01267500  |
|   |        |              | H  | -4.85630900 | 1.03538800  | -0.02154700 |
|   |        |              | C  | -1.50191600 | 2.91343200  | 0.11327500  |
|   |        |              | H  | -0.57359500 | 3.46500200  | 0.18552200  |
|   |        |              | C  | 2.21805800  | 0.78157500  | -0.00950100 |
|   |        |              | C  | 2.49134700  | -0.55315500 | 0.28093400  |
|   |        |              | H  | 1.69141800  | -1.23613000 | 0.50839100  |
|   |        |              | C  | 4.57802700  | 1.20045300  | -0.31207100 |
|   |        |              | H  | 5.38669600  | 1.87897100  | -0.54138700 |
|   |        |              | C  | -2.68275100 | 3.62592500  | 0.07712300  |
|   |        |              | H  | -2.66864200 | 4.70612700  | 0.09955300  |
|   |        |              | C  | -3.88592900 | 2.93304300  | 0.02011500  |
|   |        |              | H  | -4.82157900 | 3.47503400  | -0.01020200 |
|   |        |              | C  | 4.83915900  | -0.13006500 | -0.02424000 |
|   |        |              | C  | 3.27062200  | 1.64847400  | -0.30325600 |
|   |        |              | H  | 3.06462300  | 2.68775400  | -0.52960800 |
| 4 | CALROW | -15557.27013 | Se | -1.70143100 | -0.14844000 | 0.27954500  |
|   |        |              | Br | -1.72796900 | 2.32247100  | -0.28386500 |
|   |        |              | Br | -1.85654400 | -2.78467800 | 0.31359200  |
|   |        |              | N  | -3.37863900 | -0.89502400 | -1.85357000 |
|   |        |              | H  | -2.59769000 | -1.51923700 | -1.99762800 |
|   |        |              | H  | -4.24088500 | -1.15396200 | -2.30645800 |
|   |        |              | N  | -4.46920200 | 0.37136000  | -0.28888600 |
|   |        |              | C  | -3.38158000 | -0.23319400 | -0.69847700 |
|   |        |              | C  | -5.64091000 | 0.40914700  | -1.15884900 |
|   |        |              | H  | -6.10009700 | -0.57855800 | -1.23568800 |
|   |        |              | H  | -5.35939500 | 0.76582400  | -2.15008800 |
|   |        |              | H  | -6.36486600 | 1.09600800  | -0.73423800 |
|   |        |              | C  | -4.58683100 | 1.09857700  | 0.97348800  |
|   |        |              | H  | -3.75688500 | 0.85323400  | 1.62497500  |
|   |        |              | H  | -5.52303300 | 0.80308800  | 1.44346700  |
|   |        |              | H  | -4.58351600 | 2.16953300  | 0.77673000  |
|   |        |              | Se | 3.11975700  | 0.14117800  | 0.78171400  |
|   |        |              | Br | 1.00649300  | 0.49284300  | 2.27896600  |
|   |        |              | Br | 4.73248100  | -0.27398300 | -1.14280800 |
|   |        |              | N  | 1.35048600  | -1.65358300 | -0.38854800 |
|   |        |              | H  | 1.69406300  | -2.18079000 | 0.39851700  |
|   |        |              | H  | 0.45227700  | -1.95302000 | -0.74619000 |

|   |         |              |    |             |             |             |
|---|---------|--------------|----|-------------|-------------|-------------|
|   |         |              | N  | 1.33497000  | 0.43322700  | -1.39533300 |
|   |         |              | C  | 1.77055700  | -0.39983400 | -0.48431500 |
|   |         |              | C  | 0.51183600  | 0.01131300  | -2.52033700 |
|   |         |              | H  | 0.43760000  | -1.07095500 | -2.56462400 |
|   |         |              | H  | -0.48036600 | 0.45656500  | -2.43880300 |
|   |         |              | H  | 0.99101500  | 0.35722100  | -3.43603800 |
|   |         |              | C  | 1.73877300  | 1.84234400  | -1.40961000 |
|   |         |              | H  | 1.63554100  | 2.26262000  | -0.41319900 |
|   |         |              | H  | 2.76887300  | 1.92818000  | -1.75632900 |
|   |         |              | H  | 1.06376300  | 2.36631000  | -2.08021400 |
| 5 | CIDXOD  | -7876.894515 | C  | -0.08953400 | 0.87000200  | -0.36430900 |
|   |         |              | C  | 0.18883000  | 1.59845800  | 0.79618700  |
|   |         |              | C  | 0.39291500  | 2.97032700  | 0.71040800  |
|   |         |              | H  | 0.59863200  | 3.53790000  | 1.61042000  |
|   |         |              | C  | 0.32261100  | 3.61979700  | -0.51389800 |
|   |         |              | H  | 0.47939000  | 4.68815100  | -0.56830000 |
|   |         |              | C  | 0.04779600  | 2.89263400  | -1.66111600 |
|   |         |              | H  | -0.00813900 | 3.39073200  | -2.61938500 |
|   |         |              | C  | -0.15872500 | 1.52168400  | -1.58607500 |
|   |         |              | H  | -0.37344500 | 0.94934900  | -2.47756400 |
|   |         |              | C  | 0.29009900  | 0.91062500  | 2.12512600  |
|   |         |              | H  | -0.50129800 | 0.17558300  | 2.25076100  |
|   |         |              | H  | 0.25864400  | 1.62593200  | 2.94433800  |
|   |         |              | N  | 1.59303000  | 0.16688900  | 2.21473600  |
|   |         |              | Se | -0.39286500 | -1.03436000 | -0.29221500 |
|   |         |              | Br | -2.77046000 | -0.69989800 | 0.12682600  |
|   |         |              | Br | 2.48440700  | -1.20314500 | -0.42292000 |
|   |         |              | H  | 1.82098900  | -0.38403700 | 1.30465500  |
|   |         |              | H  | 1.60664800  | -0.49172900 | 2.99038300  |
|   |         |              | H  | 2.37264200  | 0.81347600  | 2.32217400  |
| 6 | ECIYIA2 | -21630.81053 | C  | -3.91731900 | -0.00075100 | -0.07179400 |
|   |         |              | C  | -4.37613300 | 0.78929000  | 0.96929500  |
|   |         |              | H  | -3.74737600 | 0.99995600  | 1.82265700  |
|   |         |              | C  | -5.65229400 | 1.31888200  | 0.89837800  |
|   |         |              | H  | -6.03900000 | 1.92930600  | 1.70121800  |
|   |         |              | C  | -6.43437500 | 1.06955800  | -0.22153000 |
|   |         |              | C  | -5.96442600 | 0.29234700  | -1.26849800 |
|   |         |              | H  | -6.58981100 | 0.10905100  | -2.12983600 |
|   |         |              | C  | -4.69456500 | -0.25778100 | -1.19041900 |
|   |         |              | H  | -4.33294500 | -0.89224600 | -1.98710600 |
|   |         |              | Se | -2.10590000 | -0.69071200 | -0.08645700 |
|   |         |              | Br | -1.82318000 | -1.18147000 | 2.15434900  |
|   |         |              | Br | -2.90170800 | -3.01747000 | -0.60562800 |
|   |         |              | Br | -1.20548500 | 1.70629100  | 0.26242800  |
|   |         |              | Cl | -8.02271700 | 1.73854900  | -0.30843200 |
|   |         |              | C  | 3.91731700  | 0.00073600  | 0.07179500  |
|   |         |              | C  | 4.37614000  | -0.78913900 | -0.96941400 |
|   |         |              | H  | 3.74740800  | -0.99960900 | -1.82284400 |
|   |         |              | C  | 5.65227600  | -1.31880300 | -0.89854400 |
|   |         |              | H  | 6.03899200  | -1.92908600 | -1.70148700 |
|   |         |              | C  | 6.43431100  | -1.06974700 | 0.22145300  |
|   |         |              | C  | 5.96435200  | -0.29271400 | 1.26855000  |
|   |         |              | H  | 6.58970600  | -0.10962600 | 2.12995500  |
|   |         |              | C  | 4.69453200  | 0.25751600  | 1.19050600  |
|   |         |              | H  | 4.33291400  | 0.89184400  | 1.98729800  |
|   |         |              | Se | 2.10590400  | 0.69076500  | 0.08650400  |
|   |         |              | Br | 1.82317100  | 1.18155700  | -2.15429200 |
|   |         |              | Br | 2.90180400  | 3.01751800  | 0.60563700  |
|   |         |              | Br | 1.20547600  | -1.70622600 | -0.26243100 |
|   |         |              | Cl | 8.02261900  | -1.73882700 | 0.30829400  |
| 7 | ECIYUM2 | -20910.11212 | C  | -3.91454700 | 0.34171200  | -0.41339700 |
|   |         |              | C  | -4.94877000 | -0.09276700 | 0.40127700  |
|   |         |              | H  | -4.78583100 | -0.87264900 | 1.13173300  |

|   |         |              |    |             |             |             |
|---|---------|--------------|----|-------------|-------------|-------------|
|   |         |              | C  | -6.20043200 | 0.47847300  | 0.26119100  |
|   |         |              | H  | -7.03213200 | 0.17775100  | 0.88148000  |
|   |         |              | C  | -6.38307100 | 1.45023400  | -0.70765500 |
|   |         |              | C  | -5.36242800 | 1.87857200  | -1.53397800 |
|   |         |              | H  | -5.55346100 | 2.64296500  | -2.27279900 |
|   |         |              | C  | -4.10330400 | 1.32105800  | -1.37749100 |
|   |         |              | H  | -3.28144600 | 1.66499000  | -1.98909000 |
|   |         |              | Br | -1.02580200 | 1.84723500  | -0.17334900 |
|   |         |              | Br | -1.94059600 | -0.80047600 | 1.93711700  |
|   |         |              | Br | -3.16231200 | -2.75381600 | -0.67943200 |
|   |         |              | F  | -7.59253500 | 1.99501500  | -0.84584700 |
|   |         |              | Se | -2.16762300 | -0.48634000 | -0.34235500 |
|   |         |              | C  | 3.91780900  | -0.28611900 | -0.42056900 |
|   |         |              | C  | 4.72243200  | 0.13491600  | -1.46922200 |
|   |         |              | H  | 4.42617400  | 0.95974300  | -2.10144300 |
|   |         |              | C  | 5.93334300  | -0.50247200 | -1.68802000 |
|   |         |              | H  | 6.58949700  | -0.20698000 | -2.49350500 |
|   |         |              | C  | 6.30483200  | -1.52686700 | -0.83900200 |
|   |         |              | C  | 5.50970500  | -1.94914500 | 0.21208200  |
|   |         |              | H  | 5.84467100  | -2.75689500 | 0.84630900  |
|   |         |              | C  | 4.29136100  | -1.32665900 | 0.41575300  |
|   |         |              | H  | 3.63867100  | -1.65654500 | 1.21138500  |
|   |         |              | Br | 3.19188600  | 2.85994300  | -0.28801800 |
|   |         |              | Br | 1.94659000  | 0.58934300  | 2.04361600  |
|   |         |              | Br | 1.04980400  | -1.76120700 | -0.41026700 |
|   |         |              | F  | 7.47653800  | -2.13236000 | -1.03790000 |
|   |         |              | Se | 2.18265900  | 0.55758500  | -0.25601300 |
| 8 | GIHDAF  | -10447.05204 | Br | 5.07022200  | 1.75613200  | -0.00461200 |
|   |         |              | Se | 3.93451400  | -1.26077300 | 0.19588300  |
|   |         |              | N  | 2.79541800  | -4.07057300 | 0.12915500  |
|   |         |              | C  | 1.27175900  | -0.26570900 | -0.52685600 |
|   |         |              | C  | 2.62295000  | -0.53103800 | -1.10423400 |
|   |         |              | H  | 3.13217200  | 0.38257700  | -1.40362500 |
|   |         |              | H  | 2.58686100  | -1.24110000 | -1.92606500 |
|   |         |              | C  | 1.02947600  | 0.91961100  | 0.16499400  |
|   |         |              | H  | 1.84410800  | 1.62448200  | 0.29519400  |
|   |         |              | C  | 3.18920800  | -2.98649900 | 0.14471000  |
|   |         |              | C  | -0.23064100 | 1.18022800  | 0.68131700  |
|   |         |              | H  | -0.41516300 | 2.10925900  | 1.20814400  |
|   |         |              | Se | -3.93405300 | 1.26088100  | -0.19600600 |
|   |         |              | N  | -2.79392400 | 4.07021500  | -0.12933300 |
|   |         |              | C  | -1.27142400 | 0.26525500  | 0.52654500  |
|   |         |              | C  | -2.62263400 | 0.53048800  | 1.10389400  |
|   |         |              | H  | -3.13202000 | -0.38319900 | 1.40279800  |
|   |         |              | H  | -2.58664000 | 1.24015800  | 1.92606800  |
|   |         |              | C  | -1.02913900 | -0.92005600 | -0.16529900 |
|   |         |              | H  | -1.84376100 | -1.62493000 | -0.29550900 |
|   |         |              | C  | -3.18807600 | 2.98627400  | -0.14489900 |
|   |         |              | C  | 0.23098200  | -1.18067400 | -0.68163400 |
|   |         |              | H  | 0.41551500  | -2.10971400 | -1.20844300 |
|   |         |              | Br | -5.07142100 | -1.75573100 | 0.00505800  |
| 9 | HOCDOS2 | -11064.30265 | Se | -2.10642700 | -0.45216100 | 0.27245000  |
|   |         |              | Br | -1.03418000 | 1.63630700  | 1.31584600  |
|   |         |              | O  | -5.01183400 | -3.32384200 | -0.35775000 |
|   |         |              | N  | -3.13021700 | -2.14362900 | -0.48920100 |
|   |         |              | C  | -3.79729800 | -0.24186100 | 1.16266500  |
|   |         |              | C  | -4.14582600 | 0.79538100  | 2.02716900  |
|   |         |              | H  | -3.43811200 | 1.57925000  | 2.24583200  |
|   |         |              | C  | -5.40308000 | 0.81230800  | 2.60516900  |
|   |         |              | H  | -5.65524300 | 1.62435400  | 3.27441400  |
|   |         |              | C  | -6.34641300 | -0.18404400 | 2.34919400  |
|   |         |              | H  | -7.32057000 | -0.14529600 | 2.81560900  |
|   |         |              | C  | -6.02187300 | -1.21514400 | 1.49524800  |

|    |        |              |    |             |             |             |
|----|--------|--------------|----|-------------|-------------|-------------|
|    |        |              | H  | -6.72302400 | -2.00679800 | 1.26774800  |
|    |        |              | C  | -4.75700800 | -1.23716200 | 0.90954500  |
|    |        |              | C  | -4.30507200 | -2.25274800 | 0.00316600  |
|    |        |              | C  | -4.21901100 | -3.99512300 | -1.36477500 |
|    |        |              | H  | -4.70897400 | -3.84286400 | -2.32631700 |
|    |        |              | H  | -4.19410500 | -5.05455700 | -1.12197200 |
|    |        |              | C  | -2.81909800 | -3.32559600 | -1.31165900 |
|    |        |              | C  | -1.79762400 | -4.18785800 | -0.57907300 |
|    |        |              | H  | -0.87198100 | -3.63134600 | -0.43500400 |
|    |        |              | H  | -2.18218500 | -4.49058300 | 0.39572700  |
|    |        |              | H  | -1.58018400 | -5.08219400 | -1.16450700 |
|    |        |              | C  | -2.32562700 | -2.91345100 | -2.68901500 |
|    |        |              | H  | -1.37382800 | -2.38978300 | -2.60642300 |
|    |        |              | H  | -2.18100200 | -3.79837200 | -3.31041400 |
|    |        |              | H  | -3.04771800 | -2.25710500 | -3.17432500 |
|    |        |              | Se | 2.10642700  | 0.45216100  | -0.27245000 |
|    |        |              | Br | 1.03418000  | -1.63630700 | -1.31584600 |
|    |        |              | O  | 5.01183400  | 3.32384200  | 0.35775000  |
|    |        |              | N  | 3.13021700  | 2.14362900  | 0.48920100  |
|    |        |              | C  | 3.79729800  | 0.24186100  | -1.16266500 |
|    |        |              | C  | 4.14582600  | -0.79538100 | -2.02716900 |
|    |        |              | H  | 3.43811200  | -1.57925000 | -2.24583200 |
|    |        |              | C  | 5.40308000  | -0.81230800 | -2.60516900 |
|    |        |              | H  | 5.65524300  | -1.62435400 | -3.27441400 |
|    |        |              | C  | 6.34641300  | 0.18404400  | -2.34919400 |
|    |        |              | H  | 7.32057000  | 0.14529600  | -2.81560900 |
|    |        |              | C  | 6.02187300  | 1.21514400  | -1.49524800 |
|    |        |              | H  | 6.72302400  | 2.00679800  | -1.26774800 |
|    |        |              | C  | 4.75700800  | 1.23716200  | -0.90954500 |
|    |        |              | C  | 4.30507200  | 2.25274800  | -0.00316600 |
|    |        |              | C  | 4.21901100  | 3.99512300  | 1.36477500  |
|    |        |              | H  | 4.70897400  | 3.84286400  | 2.32631700  |
|    |        |              | H  | 4.19410500  | 5.05455700  | 1.12197200  |
|    |        |              | C  | 2.81909800  | 3.32559600  | 1.31165900  |
|    |        |              | C  | 1.79762400  | 4.18785800  | 0.57907300  |
|    |        |              | H  | 0.87198100  | 3.63134600  | 0.43500400  |
|    |        |              | H  | 2.18218500  | 4.49058300  | -0.39572700 |
|    |        |              | H  | 1.58018400  | 5.08219400  | 1.16450700  |
|    |        |              | C  | 2.32562700  | 2.91345100  | 2.68901500  |
|    |        |              | H  | 1.37382800  | 2.38978300  | 2.60642300  |
|    |        |              | H  | 2.18100200  | 3.79837200  | 3.31041400  |
|    |        |              | H  | 3.04771800  | 2.25710500  | 3.17432500  |
| 10 | IWODUU | -5459.309385 | Br | -2.77901200 | -1.28544300 | -0.12470400 |
|    |        |              | C  | -0.47891100 | 1.05668400  | -0.01885500 |
|    |        |              | C  | 0.66844000  | 1.74329100  | -0.42373600 |
|    |        |              | C  | 0.69129200  | 3.12913700  | -0.38426000 |
|    |        |              | H  | 1.58945400  | 3.65166800  | -0.69088600 |
|    |        |              | C  | -0.42167800 | 3.84132300  | 0.03970500  |
|    |        |              | H  | -0.39856400 | 4.92205800  | 0.06423700  |
|    |        |              | C  | -1.55738400 | 3.15403400  | 0.43901100  |
|    |        |              | H  | -2.42897700 | 3.69657200  | 0.77970100  |
|    |        |              | C  | -1.58945400 | 1.76564300  | 0.41625100  |
|    |        |              | H  | -2.47852800 | 1.23963500  | 0.73045200  |
|    |        |              | C  | 1.84099400  | 0.93681600  | -0.90635600 |
|    |        |              | H  | 1.67028400  | 0.63472900  | -1.94360000 |
|    |        |              | H  | 2.76216600  | 1.52980600  | -0.87079000 |
|    |        |              | C  | 2.43760500  | 0.00979300  | 1.24708400  |
|    |        |              | H  | 1.75470200  | 0.74225400  | 1.67916800  |
|    |        |              | H  | 3.42192800  | 0.49168400  | 1.18179500  |
|    |        |              | C  | 2.50878800  | -1.21380500 | 2.14211900  |
|    |        |              | H  | 1.55667100  | -1.74359400 | 2.14444600  |
|    |        |              | H  | 2.72594300  | -0.90077000 | 3.16211200  |
|    |        |              | H  | 3.29449300  | -1.90336000 | 1.83436800  |



|    |        |              |    |             |             |             |
|----|--------|--------------|----|-------------|-------------|-------------|
|    |        |              | C  | 2.63779200  | -1.37602400 | -0.78843100 |
|    |        |              | H  | 2.14044300  | -1.51176700 | -1.74934600 |
|    |        |              | H  | 2.46292600  | -2.28854000 | -0.21813600 |
|    |        |              | C  | 4.13096300  | -1.15404300 | -0.98921800 |
|    |        |              | H  | 4.32495800  | -0.24502200 | -1.55931300 |
|    |        |              | H  | 4.55676100  | -1.99047800 | -1.54187200 |
|    |        |              | H  | 4.65889500  | -1.08027300 | -0.03829300 |
|    |        |              | N  | 1.94157200  | -0.28129400 | -0.10605300 |
|    |        |              | Se | -0.38676000 | -0.87182800 | -0.07343900 |
| 11 | KUSSOH | -5553.939258 | Br | 3.40563700  | 0.18477600  | -0.30785600 |
|    |        |              | C  | -1.60051500 | -0.22121700 | -0.00437800 |
|    |        |              | C  | -2.48521000 | 0.77267900  | -0.39354400 |
|    |        |              | C  | -1.99837700 | -1.53756000 | 0.14387100  |
|    |        |              | C  | -0.91503200 | -2.46612100 | 0.61813400  |
|    |        |              | H  | -0.92130100 | -2.50111000 | 1.70970900  |
|    |        |              | H  | -1.03534400 | -3.48529400 | 0.24272700  |
|    |        |              | C  | -1.87009800 | 2.12659100  | -0.64148500 |
|    |        |              | H  | -1.55326700 | 2.18544500  | -1.68526600 |
|    |        |              | H  | -2.57157500 | 2.94567000  | -0.45288000 |
|    |        |              | C  | -1.00471100 | 2.63619500  | 1.56678200  |
|    |        |              | H  | -1.42449900 | 3.64676500  | 1.59672400  |
|    |        |              | H  | -0.10438700 | 2.59824000  | 2.17597200  |
|    |        |              | H  | -1.73302500 | 1.93039800  | 1.96344100  |
|    |        |              | C  | 0.34740100  | 3.15603100  | -0.37495200 |
|    |        |              | H  | 0.61560000  | 2.80859200  | -1.36998300 |
|    |        |              | H  | 1.24257900  | 3.11159800  | 0.24371400  |
|    |        |              | H  | -0.02329500 | 4.18414200  | -0.42046500 |
|    |        |              | C  | 0.73095100  | -2.30802800 | -1.18747400 |
|    |        |              | H  | 1.65577600  | -1.79864100 | -1.45948400 |
|    |        |              | H  | -0.08092900 | -1.98889400 | -1.83891700 |
|    |        |              | H  | 0.85340200  | -3.39186300 | -1.25300300 |
|    |        |              | C  | 1.47406000  | -2.39194500 | 1.11445500  |
|    |        |              | H  | 1.50757100  | -3.48420500 | 1.10423100  |
|    |        |              | H  | 1.25627000  | -2.03576200 | 2.11886300  |
|    |        |              | H  | 2.41832800  | -1.96439400 | 0.77818800  |
|    |        |              | C  | -3.32416600 | -1.87329600 | -0.08882500 |
|    |        |              | H  | -3.65478300 | -2.89885700 | 0.01905500  |
|    |        |              | C  | -4.23055200 | -0.88251800 | -0.45176000 |
|    |        |              | H  | -5.26589200 | -1.14079000 | -0.62476100 |
|    |        |              | C  | -3.81487900 | 0.43712100  | -0.60299000 |
|    |        |              | H  | -4.52637000 | 1.19786300  | -0.89977300 |
|    |        |              | N  | -0.66704000 | 2.26146400  | 0.19276100  |
|    |        |              | N  | 0.40421300  | -1.93555100 | 0.20388800  |
|    |        |              | Se | 0.23924700  | 0.19544000  | 0.23127400  |
| 12 | PEBPUH | -15126.01906 | Br | -3.67580000 | 1.52400000  | -0.74879300 |
|    |        |              | Se | -1.31357300 | -1.38577800 | -0.35955000 |
|    |        |              | Se | -2.63730800 | 0.18694300  | 0.82499900  |
|    |        |              | C  | -2.55880100 | -2.74689600 | -0.55504100 |
|    |        |              | C  | -4.23974100 | -0.91527800 | 0.95827900  |
|    |        |              | N  | -3.26648200 | -3.63544600 | -0.73432300 |
|    |        |              | N  | -5.18486800 | -1.50948100 | 1.23015700  |
|    |        |              | Br | -0.29777000 | 1.46801200  | 0.37604700  |
|    |        |              | Se | 5.17231600  | 0.06243100  | -0.46727700 |
|    |        |              | Se | 2.96178200  | 0.71759600  | -0.00316000 |
|    |        |              | C  | 5.48184900  | -0.92522300 | 1.06055400  |
|    |        |              | C  | 2.13161500  | -0.75198500 | -0.75759500 |
|    |        |              | N  | 5.71706900  | -1.54771200 | 1.99785100  |
|    |        |              | N  | 1.58514500  | -1.65659400 | -1.21104900 |
| 13 | RAGSAT | -10585.96079 | Se | -0.00124200 | 1.66187600  | 0.90005000  |
|    |        |              | Br | 5.18494000  | -2.14071900 | -0.21554200 |
|    |        |              | Br | -5.19342100 | -2.05565100 | -0.34286400 |
|    |        |              | Br | 0.01911200  | 3.12353900  | -0.89208300 |
|    |        |              | C  | 1.48039300  | 0.53104200  | 0.44965200  |

|    |        |              |    |             |             |             |
|----|--------|--------------|----|-------------|-------------|-------------|
|    |        |              | C  | 2.68351500  | 1.12601600  | 0.09045800  |
|    |        |              | H  | 2.76672600  | 2.19596800  | -0.04608900 |
|    |        |              | C  | 3.78911900  | 0.32090500  | -0.11412300 |
|    |        |              | H  | 4.73262000  | 0.75843600  | -0.40629400 |
|    |        |              | C  | 3.68130400  | -1.05596400 | 0.05952400  |
|    |        |              | C  | 2.47678600  | -1.63744100 | 0.43518700  |
|    |        |              | H  | 2.40845300  | -2.70730400 | 0.56914100  |
|    |        |              | C  | 1.36083900  | -0.84049500 | 0.63511500  |
|    |        |              | H  | 0.42522500  | -1.29458500 | 0.93019400  |
|    |        |              | C  | -1.48692000 | 0.55429000  | 0.49257500  |
|    |        |              | C  | -2.50725100 | 0.51848500  | 1.43573300  |
|    |        |              | H  | -2.44651000 | 1.09050800  | 2.35239400  |
|    |        |              | C  | -3.61789500 | -0.27218100 | 1.18650600  |
|    |        |              | H  | -4.42264000 | -0.32374300 | 1.90522100  |
|    |        |              | C  | -3.69052300 | -0.99298600 | 0.00115300  |
|    |        |              | C  | -2.66552800 | -0.93749700 | -0.94497100 |
|    |        |              | H  | -2.74838800 | -1.49952400 | -1.86386300 |
|    |        |              | C  | -1.55246200 | -0.15921700 | -0.70110400 |
|    |        |              | H  | -0.75358800 | -0.10424000 | -1.42952900 |
| 14 | TAJMEW | -10408.83108 | Se | 1.13102500  | -1.22374400 | 0.40163400  |
|    |        |              | Se | -1.13506800 | -1.22683400 | -0.36743700 |
|    |        |              | C  | 1.75403300  | 0.19971500  | -0.74819200 |
|    |        |              | N  | 1.96454000  | -0.14444900 | -2.03423300 |
|    |        |              | N  | 1.60233800  | 1.48161100  | -0.43131700 |
|    |        |              | C  | 1.57012700  | 1.91765800  | 0.95738800  |
|    |        |              | C  | 2.12991200  | 2.47131200  | -1.36065300 |
|    |        |              | C  | -1.75856900 | 0.20541000  | 0.76927100  |
|    |        |              | N  | -2.00430600 | -0.13386300 | 2.04882700  |
|    |        |              | N  | -1.60017600 | 1.48402800  | 0.44846200  |
|    |        |              | C  | -2.13412700 | 2.48173300  | 1.36548600  |
|    |        |              | C  | -1.54375600 | 1.91458200  | -0.94157000 |
|    |        |              | H  | 2.15332900  | -1.12525800 | -2.16985800 |
|    |        |              | H  | 2.56302300  | 0.45460400  | -2.58322400 |
|    |        |              | H  | 1.07051400  | 1.17854100  | 1.57361300  |
|    |        |              | H  | 1.02653700  | 2.85994800  | 1.00736700  |
|    |        |              | H  | 2.59556400  | 2.04282400  | 1.31381500  |
|    |        |              | H  | 1.66981800  | 2.35680300  | -2.34115500 |
|    |        |              | H  | 1.89478300  | 3.46193700  | -0.98373500 |
|    |        |              | H  | 3.21851300  | 2.36580400  | -1.43233900 |
|    |        |              | H  | -2.19600800 | -1.11387800 | 2.18544200  |
|    |        |              | H  | -2.60901100 | 0.47057200  | 2.58476700  |
|    |        |              | H  | -1.69706600 | 2.36192400  | 2.35572400  |
|    |        |              | H  | -3.22528800 | 2.39117600  | 1.41348800  |
|    |        |              | H  | -1.87688100 | 3.46852700  | 0.99300000  |
|    |        |              | H  | -2.56328400 | 2.04931000  | -1.31074900 |
|    |        |              | H  | -0.98865500 | 2.85030600  | -0.98746700 |
|    |        |              | H  | -1.04506500 | 1.16728300  | -1.54854400 |
|    |        |              | Br | -4.11407200 | -0.25460300 | -0.37693800 |
|    |        |              | Br | 4.12276300  | -0.25609800 | 0.32821200  |
| 15 | TAVWUI | -10561.25923 | Br | 4.14768400  | -0.34323000 | -0.75450500 |
|    |        |              | Br | -4.10300000 | -0.61473200 | 0.62740300  |
|    |        |              | Se | 1.12350500  | -1.10615200 | -0.64765300 |
|    |        |              | Se | -1.20906100 | -1.23425700 | 0.19351600  |
|    |        |              | N  | 1.65191100  | 1.56015100  | 0.32282500  |
|    |        |              | N  | 2.00232600  | 0.05911000  | 1.83828800  |
|    |        |              | N  | -1.63249100 | 1.62038900  | 0.25508300  |
|    |        |              | N  | -1.99902400 | 0.78660500  | -1.70402800 |
|    |        |              | C  | 1.62968200  | 0.24205700  | 0.56634600  |
|    |        |              | C  | 2.34536700  | 1.27099400  | 2.38436500  |
|    |        |              | C  | 2.12967700  | 2.21036300  | 1.43448800  |
|    |        |              | C  | 1.52074200  | 2.14475800  | -1.00173000 |
|    |        |              | C  | 2.25899200  | -1.24731400 | 2.42365300  |
|    |        |              | C  | -1.63637800 | 0.48321100  | -0.45300400 |

|    |        |              |    |             |             |             |
|----|--------|--------------|----|-------------|-------------|-------------|
|    |        |              | C  | -2.29342400 | 2.12562200  | -1.77530300 |
|    |        |              | C  | -2.06743800 | 2.64723500  | -0.54691700 |
|    |        |              | C  | -1.48314500 | 1.68278400  | 1.70061200  |
|    |        |              | C  | -2.25771800 | -0.20757200 | -2.73422200 |
|    |        |              | H  | 2.71086300  | 1.35781900  | 3.39066600  |
|    |        |              | H  | 2.27819200  | 3.27407000  | 1.45034600  |
|    |        |              | H  | 1.51939600  | 3.22601700  | -0.89813800 |
|    |        |              | H  | 0.59097200  | 1.81652100  | -1.46024900 |
|    |        |              | H  | 2.37143100  | 1.81064000  | -1.59853200 |
|    |        |              | H  | 2.58548100  | -1.10193200 | 3.44874600  |
|    |        |              | H  | 3.04246700  | -1.72869100 | 1.83710500  |
|    |        |              | H  | 1.35064600  | -1.84403800 | 2.40428400  |
|    |        |              | H  | -2.63423400 | 2.58523300  | -2.68439700 |
|    |        |              | H  | -2.18053900 | 3.64899100  | -0.17603700 |
|    |        |              | H  | -1.45537400 | 2.72808600  | 1.99425000  |
|    |        |              | H  | -0.55952800 | 1.19162400  | 1.99755400  |
|    |        |              | H  | -2.33798100 | 1.17426200  | 2.14925200  |
|    |        |              | H  | -2.57840800 | 0.31012000  | -3.63287900 |
|    |        |              | H  | -3.04475300 | -0.86999200 | -2.37334100 |
|    |        |              | H  | -1.35084500 | -0.77280700 | -2.93431400 |
| 15 | XATJEH | -8150.862313 | Br | -1.51493300 | -2.80007500 | -0.24832200 |
|    |        |              | Se | -1.10913200 | -0.73717900 | 1.01985300  |
|    |        |              | N  | 1.22666200  | 1.16376200  | -0.58951500 |
|    |        |              | C  | -1.83551700 | 0.32932800  | -0.41328700 |
|    |        |              | C  | -3.17421900 | 0.69120600  | -0.36999900 |
|    |        |              | C  | -3.73363100 | 1.43368400  | -1.40036100 |
|    |        |              | C  | -2.95579500 | 1.81501000  | -2.48237000 |
|    |        |              | C  | -1.61565500 | 1.45862100  | -2.52379900 |
|    |        |              | C  | -1.04141200 | 0.72007600  | -1.49495300 |
|    |        |              | C  | 0.41552500  | 0.35779300  | -1.56281200 |
|    |        |              | C  | 1.25474000  | 2.59761700  | -0.96230900 |
|    |        |              | C  | 2.60630900  | 0.61285700  | -0.32346800 |
|    |        |              | C  | 2.54412300  | -0.61768200 | 0.57365800  |
|    |        |              | C  | 3.96441400  | -1.07382100 | 0.90966400  |
|    |        |              | C  | 4.78043900  | -1.34040300 | -0.35205900 |
|    |        |              | C  | 4.80366400  | -0.11143400 | -1.25673000 |
|    |        |              | C  | 3.38384200  | 0.33939600  | -1.60473400 |
|    |        |              | H  | -3.77493200 | 0.38484200  | 0.47475300  |
|    |        |              | H  | -4.77860500 | 1.70889700  | -1.35725800 |
|    |        |              | H  | -3.38771100 | 2.38692600  | -3.29203900 |
|    |        |              | H  | -1.00557600 | 1.75544200  | -3.36903900 |
|    |        |              | H  | 0.56074700  | -0.69298800 | -1.32059600 |
|    |        |              | H  | 0.81409900  | 0.55892700  | -2.55607500 |
|    |        |              | H  | 0.72622100  | 1.15597500  | 0.33878200  |
|    |        |              | H  | 1.78146200  | 2.71982200  | -1.90572200 |
|    |        |              | H  | 0.23080800  | 2.94957200  | -1.04896800 |
|    |        |              | H  | 1.74956400  | 3.14568500  | -0.16568600 |
|    |        |              | H  | 3.10567300  | 1.40926400  | 0.23521300  |
|    |        |              | H  | 2.01024800  | -1.42846900 | 0.07034600  |
|    |        |              | H  | 1.98761400  | -0.37885900 | 1.48075200  |
|    |        |              | H  | 3.91746200  | -1.96663500 | 1.53225900  |
|    |        |              | H  | 4.45884900  | -0.30000500 | 1.50478000  |
|    |        |              | H  | 5.79769400  | -1.63312500 | -0.09072900 |
|    |        |              | H  | 4.33798000  | -2.17947700 | -0.89737700 |
|    |        |              | H  | 5.32691600  | 0.70446700  | -0.74918700 |
|    |        |              | H  | 5.35463100  | -0.31839500 | -2.17419200 |
|    |        |              | H  | 3.41554400  | 1.22343200  | -2.24436000 |
|    |        |              | H  | 2.89052100  | -0.45816600 | -2.16649300 |
|    |        |              | Br | -0.27867700 | 1.73999300  | 2.15500200  |

**Table S12.** CSD refcodes and coordinates of the solid-state (experimental) structures containing Te···I contacts.

|                                      | CSD Refcode | Coordinates                             |
|--------------------------------------|-------------|-----------------------------------------|
| 1                                    | ATIDIQ      | I 9.14550000 9.93500000 -8.98260000     |
|                                      |             | I 9.07740000 12.63910000 -3.81530000    |
|                                      |             | Te 10.91860000 12.24850000 -6.70260000  |
|                                      |             | Te 13.93130000 12.52960000 -11.06780000 |
|                                      |             | C 12.07120000 12.39920000 -8.41450000   |
|                                      |             | C 12.74790000 12.46990000 -9.37460000   |
|                                      |             | C 12.65990000 13.97940000 -12.01510000  |
|                                      |             | H 12.71230000 14.82820000 -11.52840000  |
|                                      |             | H 12.95250000 14.11480000 -12.94110000  |
|                                      |             | H 11.73490000 13.65580000 -12.01000000  |
|                                      |             | C 12.09410000 13.71000000 -5.68930000   |
|                                      |             | H 12.05550000 14.55730000 -6.17910000   |
|                                      |             | H 11.74420000 13.83940000 -4.78390000   |
|                                      |             | H 13.02420000 13.40450000 -5.63960000   |
|                                      |             | C 9.43690000 13.58510000 -7.46480000    |
|                                      |             | H 9.26960000 13.38190000 -8.40930000    |
|                                      |             | H 8.60730000 13.47670000 -6.95630000    |
| H 9.75550000 14.50760000 -7.38100000 |             |                                         |
| 2                                    | BIPFOV      | Te -0.62350000 5.93010000 0.18060000    |
|                                      |             | C 0.16240000 6.35050000 2.14850000      |
|                                      |             | C -0.71340000 5.62670000 3.10260000     |
|                                      |             | C -0.35060000 5.51650000 4.43700000     |
|                                      |             | C -1.20850000 4.86310000 5.33040000     |
|                                      |             | C -2.35760000 4.33590000 4.93850000     |
|                                      |             | C -2.74400000 4.45730000 3.58780000     |
|                                      |             | C -1.93540000 5.07880000 2.66640000     |
|                                      |             | C -2.32740000 5.19860000 1.25270000     |
|                                      |             | C 0.27330000 4.01800000 0.04200000      |
|                                      |             | Te -4.59140000 7.25850000 -2.17280000   |
|                                      |             | C -3.14500000 7.85860000 -3.59480000    |
|                                      |             | C -3.68480000 7.45920000 -4.94320000    |
|                                      |             | C -3.01840000 7.83940000 -6.11660000    |
|                                      |             | C -3.51790000 7.45120000 -7.34370000    |
|                                      |             | C -4.67040000 6.70830000 -7.45100000    |
|                                      |             | C -5.33790000 6.32970000 -6.25660000    |
|                                      |             | C -4.83620000 6.69710000 -5.04580000    |
|                                      |             | C -5.48130000 6.19710000 -3.75580000    |
|                                      |             | C -5.75230000 9.01530000 -2.48910000    |
|                                      |             | I -2.29210000 4.42140000 -2.62510000    |
|                                      |             | I -2.86480000 9.06750000 0.50900000     |
|                                      |             | I 2.86480000 6.90850000 -0.50900000     |
|                                      |             | I -8.33520000 6.90850000 -0.50900000    |
|                                      |             | H 0.03751257 7.39792544 2.32795217      |
|                                      |             | H 1.13573076 5.90995853 2.20724056      |
|                                      |             | H 0.57599324 5.92687408 4.78039202      |
|                                      |             | H -0.92684469 4.78783930 6.35991742     |
|                                      |             | H -2.98534272 3.82410306 5.63771597     |
|                                      |             | H -3.68558255 4.05756240 3.27390169     |
|                                      |             | H -3.08512270 5.95197754 1.19632104     |
|                                      |             | H -2.52762765 4.21054157 0.89416211     |
|                                      |             | H 0.82751035 3.81838928 0.93525609      |
|                                      |             | H -0.48730950 3.27526254 -0.07930233    |
| H 0.93307711 3.99368449 -0.80002311  |             |                                         |
| H -2.26251119 7.27980565 -3.41841802 |             |                                         |
| H -3.09726504 8.92729651 -3.57223567 |             |                                         |
| H -2.12649444 8.42791563 -6.06133862 |             |                                         |
| H -2.99552122 7.73529897 -8.23325505 |             |                                         |
| H -5.05348433 6.42345382 -8.40860589 |             |                                         |
| H -6.23817699 5.75374693 -6.30836291 |             |                                         |
| H -5.20952350 5.16847953 -3.64188132 |             |                                         |

|   |        |    |             |             |             |
|---|--------|----|-------------|-------------|-------------|
|   |        | H  | -6.51344607 | 6.47750644  | -3.78656891 |
|   |        | H  | -6.61569529 | 8.99076986  | -1.85755678 |
|   |        | H  | -5.16419221 | 9.87821742  | -2.25585603 |
|   |        | H  | -6.06036890 | 9.05971099  | -3.51282907 |
| 3 | BIPTEI | I  | 3.70140000  | 6.77880000  | 3.41190000  |
|   |        | I  | 0.87060000  | 9.76590000  | 3.62740000  |
|   |        | I  | -0.70780000 | 8.19120000  | 6.99240000  |
|   |        | Te | 1.56950000  | 7.55430000  | 5.10110000  |
|   |        | C  | 2.93930000  | 8.51440000  | 6.45710000  |
|   |        | C  | 3.50590000  | 9.69370000  | 6.10450000  |
|   |        | C  | 4.39590000  | 10.29790000 | 7.03490000  |
|   |        | C  | 4.62890000  | 9.72690000  | 8.26140000  |
|   |        | C  | 4.04030000  | 8.53930000  | 8.57410000  |
|   |        | C  | 3.17250000  | 7.88800000  | 7.70010000  |
|   |        | C  | 2.52790000  | 6.60890000  | 8.08180000  |
|   |        | C  | 1.76760000  | 6.52430000  | 9.24910000  |
|   |        | C  | 1.12660000  | 5.33950000  | 9.58510000  |
|   |        | C  | 1.25190000  | 4.24890000  | 8.77030000  |
|   |        | C  | 1.97120000  | 4.27380000  | 7.63700000  |
|   |        | C  | 2.63090000  | 5.47390000  | 7.26600000  |
|   |        | H  | 3.32130000  | 10.10250000 | 5.22470000  |
|   |        | H  | 4.82480000  | 11.15570000 | 6.81730000  |
|   |        | H  | 5.22830000  | 10.15790000 | 8.89560000  |
|   |        | H  | 4.23610000  | 8.12080000  | 9.45880000  |
|   |        | H  | 1.69060000  | 7.31700000  | 9.81810000  |
|   |        | H  | 0.60410000  | 5.30760000  | 10.38140000 |
|   |        | H  | 0.80450000  | 3.42290000  | 9.01210000  |
|   |        | H  | 2.05740000  | 3.46450000  | 7.06980000  |
|   |        | H  | 3.16200000  | 5.51550000  | 6.45800000  |
|   |        | I  | -4.95580000 | 7.07920000  | 6.29940000  |
|   |        | I  | -2.12500000 | 4.09210000  | 6.08390000  |
|   |        | I  | -0.54660000 | 5.66680000  | 2.71890000  |
|   |        | Te | -2.82390000 | 6.30370000  | 4.61030000  |
|   |        | C  | -4.19370000 | 5.34360000  | 3.25430000  |
|   |        | C  | -4.76020000 | 4.16430000  | 3.60680000  |
|   |        | C  | -5.65030000 | 3.56010000  | 2.67640000  |
|   |        | C  | -5.88320000 | 4.13110000  | 1.44990000  |
|   |        | C  | -5.29470000 | 5.31870000  | 1.13720000  |
|   |        | C  | -4.42680000 | 5.97000000  | 2.01120000  |
|   |        | C  | -3.78230000 | 7.24910000  | 1.62960000  |
|   |        | C  | -3.02200000 | 7.33370000  | 0.46230000  |
|   |        | C  | -2.38100000 | 8.51850000  | 0.12620000  |
|   |        | C  | -2.50630000 | 9.60910000  | 0.94100000  |
|   |        | C  | -3.22550000 | 9.58420000  | 2.07430000  |
|   |        | C  | -3.88530000 | 8.38410000  | 2.44530000  |
|   |        | H  | -4.57570000 | 3.75550000  | 4.48660000  |
|   |        | H  | -6.07920000 | 2.70230000  | 2.89400000  |
|   |        | H  | -6.48270000 | 3.70010000  | 0.81580000  |
|   |        | H  | -5.49050000 | 5.73720000  | 0.25250000  |
|   |        | H  | -2.94500000 | 6.54100000  | -0.10680000 |
|   |        | H  | -1.85850000 | 8.55040000  | -0.67010000 |
|   |        | H  | -2.05890000 | 10.43510000 | 0.69920000  |
|   |        | H  | -3.31180000 | 10.39350000 | 2.64150000  |
|   |        | H  | -4.41640000 | 8.34250000  | 3.25330000  |
| 4 | CIFLEI | Te | 5.84200000  | 0.00000000  | 0.00000000  |
|   |        | I  | 8.76380000  | 0.14870000  | -0.11410000 |
|   |        | C  | 5.75900000  | 1.57500000  | 1.43660000  |
|   |        | C  | 6.71950000  | 1.60070000  | 2.46230000  |
|   |        | C  | 6.71710000  | 2.68380000  | 3.40950000  |
|   |        | C  | 5.79290000  | 3.65830000  | 3.27600000  |
|   |        | C  | 4.83720000  | 3.65710000  | 2.25130000  |
|   |        | C  | 4.85350000  | 2.59850000  | 1.33980000  |
|   |        | H  | 7.37730000  | 0.90900000  | 2.52350000  |

|   |        |    |             |             |             |
|---|--------|----|-------------|-------------|-------------|
|   |        | H  | 7.32240000  | 2.69550000  | 4.13650000  |
|   |        | H  | 5.81750000  | 4.40490000  | 3.89080000  |
|   |        | H  | 4.16420000  | 4.33940000  | 2.18810000  |
|   |        | H  | 4.21910000  | 2.59150000  | 0.61380000  |
|   |        | I  | 2.92020000  | -0.14870000 | -0.11410000 |
|   |        | C  | 5.92500000  | -1.57500000 | 1.43660000  |
|   |        | C  | 4.96450000  | -1.60070000 | 2.46230000  |
|   |        | C  | 6.83050000  | -2.59850000 | 1.33980000  |
|   |        | C  | 4.96690000  | -2.68380000 | 3.40950000  |
|   |        | H  | 4.30670000  | -0.90900000 | 2.52350000  |
|   |        | C  | 6.84680000  | -3.65710000 | 2.25130000  |
|   |        | H  | 7.46490000  | -2.59150000 | 0.61380000  |
|   |        | C  | 5.89110000  | -3.65830000 | 3.27600000  |
|   |        | H  | 4.36160000  | -2.69550000 | 4.13650000  |
|   |        | H  | 7.51980000  | -4.33940000 | 2.18810000  |
|   |        | H  | 5.86650000  | -4.40490000 | 3.89080000  |
|   |        | Te | 5.84200000  | 5.84200000  | -2.54900000 |
|   |        | I  | 5.69330000  | 8.76380000  | -2.66310000 |
|   |        | C  | 4.26700000  | 5.75900000  | -1.11240000 |
|   |        | C  | 4.24130000  | 6.71950000  | -0.08670000 |
|   |        | C  | 3.15820000  | 6.71710000  | 0.86050000  |
|   |        | C  | 2.18370000  | 5.79290000  | 0.72700000  |
|   |        | C  | 2.18490000  | 4.83720000  | -0.29770000 |
|   |        | C  | 3.24350000  | 4.85350000  | -1.20920000 |
|   |        | H  | 4.93300000  | 7.37730000  | -0.02550000 |
|   |        | H  | 3.14650000  | 7.32240000  | 1.58750000  |
|   |        | H  | 1.43710000  | 5.81750000  | 1.34180000  |
|   |        | H  | 1.50260000  | 4.16420000  | -0.36090000 |
|   |        | H  | 3.25050000  | 4.21910000  | -1.93520000 |
|   |        | I  | 5.99070000  | 2.92020000  | -2.66310000 |
|   |        | C  | 7.41700000  | 5.92500000  | -1.11240000 |
|   |        | C  | 7.44270000  | 4.96450000  | -0.08670000 |
|   |        | C  | 8.44050000  | 6.83050000  | -1.20920000 |
|   |        | C  | 8.52580000  | 4.96690000  | 0.86050000  |
|   |        | H  | 6.75100000  | 4.30670000  | -0.02550000 |
|   |        | C  | 9.49910000  | 6.84680000  | -0.29770000 |
|   |        | H  | 8.43350000  | 7.46490000  | -1.93520000 |
|   |        | C  | 9.50030000  | 5.89110000  | 0.72700000  |
|   |        | H  | 8.53750000  | 4.36160000  | 1.58750000  |
|   |        | H  | 10.18140000 | 7.51980000  | -0.36090000 |
|   |        | H  | 10.24690000 | 5.86650000  | 1.34180000  |
| 5 | CIFLOS | Te | 7.70030000  | 4.42240000  | 4.43350000  |
|   |        | I  | 9.95750000  | 2.56630000  | 5.61550000  |
|   |        | I  | 9.95750000  | 6.32620000  | 3.25510000  |
|   |        | I  | 5.78290000  | 2.86710000  | 5.70090000  |
|   |        | I  | 5.88170000  | 6.21850000  | 3.31130000  |
|   |        | C  | 7.78480000  | 3.20090000  | 2.65660000  |
|   |        | C  | 7.96000000  | 3.80020000  | 1.45060000  |
|   |        | C  | 8.05160000  | 3.02680000  | 0.29440000  |
|   |        | C  | 7.92220000  | 1.62890000  | 0.44960000  |
|   |        | C  | 7.68720000  | 1.05100000  | 1.67050000  |
|   |        | C  | 7.65530000  | 1.84710000  | 2.77980000  |
|   |        | H  | 7.93610000  | 4.75160000  | 1.37080000  |
|   |        | H  | 8.16710000  | 3.35860000  | -0.63840000 |
|   |        | H  | 8.04960000  | 1.00310000  | -0.27930000 |
|   |        | H  | 7.58160000  | 0.07950000  | 1.73700000  |
|   |        | H  | 7.44220000  | 1.45220000  | 3.67540000  |
|   |        | Te | 12.21470000 | 4.42240000  | 4.43350000  |
|   |        | I  | 14.13210000 | 2.86710000  | 5.70090000  |
|   |        | I  | 14.03330000 | 6.21850000  | 3.31130000  |
|   |        | C  | 12.13020000 | 3.20090000  | 2.65660000  |
|   |        | C  | 11.95500000 | 3.80020000  | 1.45060000  |
|   |        | C  | 12.25970000 | 1.84710000  | 2.77980000  |

|   |        |    |             |             |             |
|---|--------|----|-------------|-------------|-------------|
|   |        | C  | 11.86340000 | 3.02680000  | 0.29440000  |
|   |        | H  | 11.97890000 | 4.75160000  | 1.37080000  |
|   |        | C  | 12.22780000 | 1.05100000  | 1.67050000  |
|   |        | H  | 12.47280000 | 1.45220000  | 3.67540000  |
|   |        | C  | 11.99280000 | 1.62890000  | 0.44960000  |
|   |        | H  | 11.74790000 | 3.35860000  | -0.63840000 |
|   |        | H  | 12.33340000 | 0.07950000  | 1.73700000  |
|   |        | H  | 11.86540000 | 1.00310000  | -0.27930000 |
| 6 | CIFLUY | Te | 2.99020000  | 3.79870000  | 0.00000000  |
|   |        | I  | 4.45550000  | 5.77950000  | 2.17240000  |
|   |        | I  | 1.80020000  | 2.29740000  | 2.01480000  |
|   |        | C  | 4.74070000  | 2.59960000  | 0.00000000  |
|   |        | C  | 5.32160000  | 2.22280000  | 1.19530000  |
|   |        | C  | 6.52110000  | 1.49690000  | 1.20070000  |
|   |        | C  | 7.05220000  | 1.17090000  | 0.00000000  |
|   |        | H  | 4.90640000  | 2.46550000  | 2.02180000  |
|   |        | H  | 6.92740000  | 1.23100000  | 2.02450000  |
|   |        | H  | 7.86480000  | 0.67740000  | 0.00000000  |
|   |        | I  | 4.45550000  | 5.77950000  | -2.17240000 |
|   |        | I  | 1.80020000  | 2.29740000  | -2.01480000 |
|   |        | Te | 5.92080000  | 7.76030000  | 0.00000000  |
|   |        | C  | 5.32160000  | 2.22280000  | -1.19530000 |
|   |        | C  | 6.52110000  | 1.49690000  | -1.20070000 |
|   |        | I  | 7.11080000  | 9.26160000  | -2.01480000 |
|   |        | I  | 7.11080000  | 9.26160000  | 2.01480000  |
|   |        | C  | 4.17030000  | 8.95940000  | 0.00000000  |
|   |        | H  | 4.90640000  | 2.46550000  | -2.02180000 |
|   |        | H  | 6.92740000  | 1.23100000  | -2.02450000 |
|   |        | C  | 3.58940000  | 9.33620000  | -1.19530000 |
|   |        | C  | 3.58940000  | 9.33620000  | 1.19530000  |
|   |        | C  | 2.38990000  | 10.06210000 | -1.20070000 |
|   |        | H  | 4.00460000  | 9.09350000  | -2.02180000 |
|   |        | C  | 2.38990000  | 10.06210000 | 1.20070000  |
|   |        | H  | 4.00460000  | 9.09350000  | 2.02180000  |
|   |        | C  | 1.85880000  | 10.38810000 | 0.00000000  |
|   |        | H  | 1.98360000  | 10.32800000 | -2.02450000 |
|   |        | H  | 1.98360000  | 10.32800000 | 2.02450000  |
|   |        | H  | 1.04620000  | 10.88160000 | 0.00000000  |
| 7 | GEHDON | I  | 3.82650000  | 6.79830000  | 8.30010000  |
|   |        | I  | 2.90720000  | 2.43950000  | 4.49980000  |
|   |        | Te | 3.41180000  | 4.55310000  | 6.40930000  |
|   |        | I  | 1.45860000  | 3.50210000  | 8.21230000  |
|   |        | S  | 5.47230000  | 5.36790000  | 4.71700000  |
|   |        | C  | 2.78430000  | 5.90260000  | 1.87260000  |
|   |        | H  | 2.73360000  | 6.74320000  | 1.39160000  |
|   |        | H  | 1.89360000  | 5.52520000  | 1.94800000  |
|   |        | C  | 3.71290000  | 4.95320000  | 1.19490000  |
|   |        | H  | 3.27650000  | 4.10680000  | 1.00770000  |
|   |        | H  | 4.05530000  | 5.32540000  | 0.36780000  |
|   |        | C  | 4.94590000  | 3.42800000  | 7.40670000  |
|   |        | N  | 3.38140000  | 6.08280000  | 3.16720000  |
|   |        | H  | 3.03830000  | 6.57200000  | 3.78550000  |
|   |        | C  | 4.49430000  | 5.42630000  | 3.30320000  |
|   |        | C  | 6.83330000  | 2.06250000  | 8.84950000  |
|   |        | H  | 7.46630000  | 1.60000000  | 9.35060000  |
|   |        | C  | 5.66120000  | 1.42880000  | 8.45750000  |
|   |        | H  | 5.51170000  | 0.54120000  | 8.69320000  |
|   |        | C  | 6.11120000  | 4.06280000  | 7.76770000  |
|   |        | H  | 6.26760000  | 4.94780000  | 7.52520000  |
|   |        | C  | 4.72430000  | 2.10890000  | 7.72600000  |
|   |        | H  | 3.94650000  | 1.68380000  | 7.44710000  |
|   |        | C  | 7.05340000  | 3.34740000  | 8.50460000  |
|   |        | H  | 7.84530000  | 3.76230000  | 8.76060000  |

|   |        |    |             |             |             |
|---|--------|----|-------------|-------------|-------------|
|   |        | N  | 4.77470000  | 4.79510000  | 2.18370000  |
|   |        | H  | 5.49460000  | 4.34450000  | 2.05170000  |
|   |        | I  | -0.01690000 | 5.89020000  | 5.17150000  |
|   |        | I  | 0.90240000  | 10.24910000 | 8.97180000  |
|   |        | Te | 0.39770000  | 8.13550000  | 7.06240000  |
|   |        | I  | 2.35090000  | 9.18650000  | 5.25930000  |
|   |        | S  | -1.66280000 | 7.32060000  | 8.75470000  |
|   |        | C  | 1.02520000  | 6.78600000  | 11.59910000 |
|   |        | H  | 1.07600000  | 5.94540000  | 12.08000000 |
|   |        | H  | 1.91590000  | 7.16330000  | 11.52360000 |
|   |        | C  | 0.09660000  | 7.73530000  | 12.27670000 |
|   |        | H  | 0.53310000  | 8.58170000  | 12.46390000 |
|   |        | H  | -0.24570000 | 7.36310000  | 13.10380000 |
|   |        | C  | -1.13630000 | 9.26050000  | 6.06490000  |
|   |        | N  | 0.42820000  | 6.60570000  | 10.30440000 |
|   |        | H  | 0.77130000  | 6.11650000  | 9.68610000  |
|   |        | C  | -0.68470000 | 7.26230000  | 10.16840000 |
|   |        | C  | -3.02380000 | 10.62600000 | 4.62210000  |
|   |        | H  | -3.65670000 | 11.08860000 | 4.12100000  |
|   |        | C  | -1.85170000 | 11.25970000 | 5.01410000  |
|   |        | H  | -1.70210000 | 12.14740000 | 4.77840000  |
|   |        | C  | -2.30170000 | 8.62570000  | 5.70390000  |
|   |        | H  | -2.45800000 | 7.74070000  | 5.94640000  |
|   |        | C  | -0.91470000 | 10.57960000 | 5.74560000  |
|   |        | H  | -0.13690000 | 11.00470000 | 6.02450000  |
|   |        | C  | -3.24380000 | 9.34110000  | 4.96700000  |
|   |        | H  | -4.03570000 | 8.92620000  | 4.71100000  |
|   |        | N  | -0.96510000 | 7.89350000  | 11.28790000 |
|   |        | H  | -1.68500000 | 8.34400000  | 11.41990000 |
| 8 | GIPRUT | C  | 4.50100000  | -0.08220000 | 3.94650000  |
|   |        | C  | 3.13830000  | -0.35390000 | 4.18260000  |
|   |        | C  | 2.30790000  | -0.58900000 | 3.08830000  |
|   |        | H  | 1.40770000  | -0.76970000 | 3.22850000  |
|   |        | C  | 2.80350000  | -0.55740000 | 1.79080000  |
|   |        | H  | 2.23690000  | -0.72040000 | 1.07260000  |
|   |        | C  | 4.14570000  | -0.27930000 | 1.56770000  |
|   |        | H  | 4.47070000  | -0.24900000 | 0.69640000  |
|   |        | C  | 5.01460000  | -0.04420000 | 2.63950000  |
|   |        | C  | 2.55130000  | -0.36270000 | 5.56050000  |
|   |        | C  | 2.62030000  | -1.51920000 | 6.35560000  |
|   |        | C  | 2.08770000  | -1.48000000 | 7.64740000  |
|   |        | H  | 2.13190000  | -2.24340000 | 8.17590000  |
|   |        | C  | 1.49560000  | -0.33870000 | 8.16430000  |
|   |        | C  | 1.40790000  | 0.78110000  | 7.34550000  |
|   |        | H  | 0.99890000  | 1.54830000  | 7.67370000  |
|   |        | C  | 1.91550000  | 0.78740000  | 6.04310000  |
|   |        | C  | 3.25760000  | -2.78060000 | 5.84400000  |
|   |        | H  | 3.56990000  | -2.64030000 | 4.94740000  |
|   |        | H  | 2.61110000  | -3.49090000 | 5.85010000  |
|   |        | H  | 3.99740000  | -3.01700000 | 6.40840000  |
|   |        | C  | 0.96690000  | -0.30840000 | 9.58380000  |
|   |        | H  | 0.59320000  | 0.55740000  | 9.76730000  |
|   |        | H  | 1.68450000  | -0.48410000 | 10.19670000 |
|   |        | H  | 0.28640000  | -0.97830000 | 9.68690000  |
|   |        | C  | 1.75500000  | 2.01720000  | 5.19170000  |
|   |        | H  | 2.15610000  | 1.86550000  | 4.33300000  |
|   |        | H  | 2.18620000  | 2.76040000  | 5.61950000  |
|   |        | H  | 0.82110000  | 2.20930000  | 5.07940000  |
|   |        | C  | 6.45490000  | 0.26290000  | 2.36400000  |
|   |        | C  | 6.82820000  | 1.57480000  | 2.05270000  |
|   |        | C  | 8.18050000  | 1.85790000  | 1.83730000  |
|   |        | H  | 8.43370000  | 2.73260000  | 1.64460000  |
|   |        | C  | 9.15190000  | 0.87840000  | 1.90080000  |



|    |        |    |             |             |             |
|----|--------|----|-------------|-------------|-------------|
|    |        | C  | 8.75830000  | -0.42340000 | 2.17560000  |
|    |        | H  | 9.39980000  | -1.09580000 | 2.19990000  |
|    |        | C  | 7.42460000  | -0.74820000 | 2.41420000  |
|    |        | C  | 5.80830000  | 2.67320000  | 1.96010000  |
|    |        | H  | 6.24690000  | 3.49850000  | 1.73860000  |
|    |        | H  | 5.35910000  | 2.76540000  | 2.80220000  |
|    |        | H  | 5.16770000  | 2.45830000  | 1.27740000  |
|    |        | C  | 10.61500000 | 1.22470000  | 1.72650000  |
|    |        | H  | 11.14460000 | 0.42590000  | 1.79930000  |
|    |        | H  | 10.88080000 | 1.84780000  | 2.40620000  |
|    |        | H  | 10.74980000 | 1.61910000  | 0.86170000  |
|    |        | C  | 7.04000000  | -2.17010000 | 2.74300000  |
|    |        | H  | 6.09110000  | -2.22200000 | 2.87950000  |
|    |        | H  | 7.49290000  | -2.44690000 | 3.54400000  |
|    |        | H  | 7.29220000  | -2.74650000 | 2.01780000  |
|    |        | Te | 5.81920000  | 0.16860000  | 5.60080000  |
|    |        | I  | 5.40960000  | 2.77540000  | 6.04630000  |
| 9  | GOCROI | Te | 0.85750000  | 1.85230000  | 6.87260000  |
|    |        | N  | 0.59300000  | 4.36840000  | 9.23420000  |
|    |        | N  | 0.41450000  | 3.05900000  | 9.48980000  |
|    |        | N  | 0.16680000  | 2.90290000  | 10.76990000 |
|    |        | C  | 1.77840000  | 1.64350000  | 4.95520000  |
|    |        | H  | 1.78550000  | 0.69840000  | 4.69740000  |
|    |        | H  | 2.69830000  | 1.97840000  | 4.99650000  |
|    |        | H  | 1.27270000  | 2.15920000  | 4.29240000  |
|    |        | C  | 0.18520000  | 4.14630000  | 11.35570000 |
|    |        | C  | -0.05590000 | 4.52040000  | 12.67870000 |
|    |        | H  | -0.24440000 | 3.88010000  | 13.35340000 |
|    |        | C  | -0.00430000 | 5.88890000  | 12.95240000 |
|    |        | H  | -0.16720000 | 6.18950000  | 13.83950000 |
|    |        | C  | 0.28160000  | 6.83620000  | 11.94820000 |
|    |        | H  | 0.30870000  | 7.75700000  | 12.18180000 |
|    |        | C  | 0.52320000  | 6.47510000  | 10.64780000 |
|    |        | H  | 0.72450000  | 7.11540000  | 9.97540000  |
|    |        | C  | 0.45320000  | 5.09960000  | 10.37180000 |
|    |        | C  | 0.73290000  | 4.81050000  | 7.85460000  |
|    |        | H  | 1.13620000  | 5.71400000  | 7.84520000  |
|    |        | H  | -0.16640000 | 4.87580000  | 7.44550000  |
|    |        | C  | 1.58130000  | 3.88620000  | 7.02690000  |
|    |        | H  | 2.49190000  | 3.86600000  | 7.41450000  |
|    |        | H  | 1.65470000  | 4.26250000  | 6.11420000  |
|    |        | C  | 2.39960000  | 0.91630000  | 7.99940000  |
|    |        | C  | 1.98380000  | 0.16410000  | 9.10990000  |
|    |        | H  | 1.06830000  | 0.14050000  | 9.36240000  |
|    |        | C  | 2.93650000  | -0.54420000 | 9.83130000  |
|    |        | H  | 2.66860000  | -1.06010000 | 10.58360000 |
|    |        | C  | 4.27820000  | -0.50620000 | 9.46490000  |
|    |        | H  | 4.92050000  | -0.99760000 | 9.96430000  |
|    |        | C  | 4.67910000  | 0.25210000  | 8.36800000  |
|    |        | H  | 5.59620000  | 0.27960000  | 8.12200000  |
|    |        | C  | 3.73600000  | 0.97330000  | 7.62850000  |
|    |        | H  | 4.00630000  | 1.49480000  | 6.88270000  |
|    |        | I  | -1.70190000 | 3.39670000  | 5.05020000  |
|    |        | I  | 0.21110000  | -1.60490000 | 6.25790000  |
| 10 | LADXEV | Te | 10.05590000 | 4.44810000  | 1.32000000  |
|    |        | I  | 12.88020000 | 5.56400000  | 1.62420000  |
|    |        | I  | 9.28040000  | 5.69590000  | 3.63630000  |
|    |        | I  | 7.47910000  | 3.41140000  | 0.78760000  |
|    |        | C  | 10.48400000 | 1.42610000  | 1.67330000  |
|    |        | H  | 10.03780000 | 1.39880000  | 0.85690000  |
|    |        | O  | 9.10970000  | 6.94010000  | 0.19660000  |
|    |        | C  | 10.69200000 | 2.60470000  | 2.28400000  |
|    |        | C  | 11.34970000 | 2.69720000  | 3.52210000  |

|    |        |    |             |             |             |
|----|--------|----|-------------|-------------|-------------|
|    |        | H  | 11.48150000 | 3.51580000  | 3.94230000  |
|    |        | C  | 7.83010000  | 7.60300000  | 0.36320000  |
|    |        | H  | 7.87240000  | 8.24290000  | 1.09100000  |
|    |        | H  | 7.13540000  | 6.95510000  | 0.55980000  |
|    |        | C  | 10.92930000 | 0.25440000  | 2.25400000  |
|    |        | H  | 10.79400000 | -0.56070000 | 1.82630000  |
|    |        | C  | 11.58460000 | 0.30280000  | 3.48460000  |
|    |        | H  | 11.87190000 | -0.48500000 | 3.88680000  |
|    |        | C  | 11.80210000 | 1.48770000  | 4.09540000  |
|    |        | H  | 12.25770000 | 1.50790000  | 4.90570000  |
|    |        | C  | 7.54440000  | 8.29930000  | -0.92740000 |
|    |        | H  | 7.29860000  | 9.22450000  | -0.77140000 |
|    |        | H  | 6.82200000  | 7.85830000  | -1.40160000 |
|    |        | C  | 8.84370000  | 8.21300000  | -1.71980000 |
|    |        | H  | 8.66250000  | 8.03340000  | -2.65620000 |
|    |        | H  | 9.34280000  | 9.04220000  | -1.65230000 |
|    |        | C  | 9.56100000  | 7.14790000  | -1.14050000 |
|    |        | H  | 10.50770000 | 7.36090000  | -1.13600000 |
|    |        | H  | 9.43010000  | 6.34510000  | -1.66130000 |
|    |        | Te | 13.77850000 | 4.35470000  | -1.32000000 |
|    |        | I  | 10.95420000 | 3.23880000  | -1.62420000 |
|    |        | I  | 14.55400000 | 3.10690000  | -3.63630000 |
|    |        | I  | 16.35530000 | 5.39140000  | -0.78760000 |
|    |        | C  | 13.35040000 | 7.37670000  | -1.67330000 |
|    |        | H  | 13.79660000 | 7.40400000  | -0.85690000 |
|    |        | O  | 14.72470000 | 1.86270000  | -0.19660000 |
|    |        | C  | 13.14240000 | 6.19810000  | -2.28400000 |
|    |        | C  | 12.48470000 | 6.10560000  | -3.52210000 |
|    |        | H  | 12.35290000 | 5.28700000  | -3.94230000 |
|    |        | C  | 16.00430000 | 1.19980000  | -0.36320000 |
|    |        | H  | 15.96200000 | 0.55990000  | -1.09100000 |
|    |        | H  | 16.69900000 | 1.84770000  | -0.55980000 |
|    |        | C  | 12.90510000 | 8.54840000  | -2.25400000 |
|    |        | H  | 13.04040000 | 9.36350000  | -1.82630000 |
|    |        | C  | 12.24980000 | 8.50000000  | -3.48460000 |
|    |        | H  | 11.96250000 | 9.28780000  | -3.88680000 |
|    |        | C  | 12.03230000 | 7.31510000  | -4.09540000 |
|    |        | H  | 11.57670000 | 7.29490000  | -4.90570000 |
|    |        | C  | 16.29000000 | 0.50350000  | 0.92740000  |
|    |        | H  | 16.53580000 | -0.42170000 | 0.77140000  |
|    |        | H  | 17.01240000 | 0.94450000  | 1.40160000  |
|    |        | C  | 14.99070000 | 0.58980000  | 1.71980000  |
|    |        | H  | 15.17190000 | 0.76940000  | 2.65620000  |
|    |        | H  | 14.49160000 | -0.23940000 | 1.65230000  |
|    |        | C  | 14.27340000 | 1.65490000  | 1.14050000  |
|    |        | H  | 13.32670000 | 1.44190000  | 1.13600000  |
|    |        | H  | 14.40430000 | 2.45770000  | 1.66130000  |
| 11 | MECGOR | I  | 6.48410000  | 1.91920000  | 10.11250000 |
|    |        | I  | 3.12050000  | -0.50500000 | 10.04410000 |
|    |        | I  | 4.07150000  | 5.28600000  | 10.43950000 |
|    |        | I  | 0.68690000  | 2.81170000  | 10.36780000 |
|    |        | Te | 3.60580000  | 2.41330000  | 10.17770000 |
|    |        | C  | 3.51340000  | 2.58670000  | 8.02750000  |
|    |        | C  | 2.69490000  | 3.54290000  | 7.45750000  |
|    |        | H  | 2.20460000  | 4.12660000  | 7.98970000  |
|    |        | C  | 2.62280000  | 3.61060000  | 6.08610000  |
|    |        | H  | 2.05830000  | 4.23620000  | 5.69270000  |
|    |        | C  | 3.35720000  | 2.78560000  | 5.28950000  |
|    |        | H  | 3.31580000  | 2.86630000  | 4.36390000  |
|    |        | C  | 4.14850000  | 1.84750000  | 5.85830000  |
|    |        | H  | 4.63270000  | 1.26850000  | 5.31510000  |
|    |        | C  | 4.25330000  | 1.73180000  | 7.24190000  |
|    |        | H  | 4.80890000  | 1.09180000  | 7.62560000  |

|    |        |    |             |             |             |
|----|--------|----|-------------|-------------|-------------|
|    |        | I  | 1.23380000  | 4.94370000  | 14.24650000 |
|    |        | I  | 4.59740000  | 7.36800000  | 14.31490000 |
|    |        | I  | 3.64640000  | 1.57700000  | 13.91940000 |
|    |        | I  | 7.03100000  | 4.05130000  | 13.99120000 |
|    |        | Te | 4.11210000  | 4.44970000  | 14.18130000 |
|    |        | C  | 4.20450000  | 4.27620000  | 16.33150000 |
|    |        | C  | 5.02300000  | 3.32010000  | 16.90150000 |
|    |        | H  | 5.51330000  | 2.73640000  | 16.36920000 |
|    |        | C  | 5.09510000  | 3.25240000  | 18.27290000 |
|    |        | H  | 5.65960000  | 2.62680000  | 18.66630000 |
|    |        | C  | 4.36070000  | 4.07740000  | 19.06940000 |
|    |        | H  | 4.40210000  | 3.99670000  | 19.99510000 |
|    |        | C  | 3.56940000  | 5.01550000  | 18.50060000 |
|    |        | H  | 3.08520000  | 5.59450000  | 19.04380000 |
|    |        | C  | 3.46460000  | 5.13120000  | 17.11700000 |
|    |        | H  | 2.90900000  | 5.77110000  | 16.73340000 |
| 12 | TUPWIK | I  | 5.50690000  | -1.21500000 | 13.88450000 |
|    |        | I  | 0.81180000  | -1.18100000 | 10.42430000 |
|    |        | Te | 3.15090000  | -1.22710000 | 12.13400000 |
|    |        | O  | 3.06130000  | 1.92170000  | 13.17570000 |
|    |        | O  | 4.44820000  | -0.76800000 | 9.63470000  |
|    |        | C  | 3.75870000  | 0.63440000  | 11.35090000 |
|    |        | C  | 3.63080000  | 1.88720000  | 11.92870000 |
|    |        | C  | 4.07470000  | 3.00640000  | 11.25960000 |
|    |        | C  | 4.66300000  | 2.85780000  | 10.01880000 |
|    |        | C  | 4.81900000  | 1.63500000  | 9.42090000  |
|    |        | C  | 4.37420000  | 0.51240000  | 10.09470000 |
|    |        | C  | 2.91930000  | 3.18720000  | 13.80450000 |
|    |        | C  | 5.10330000  | -1.01210000 | 8.39390000  |
|    |        | C  | 1.92300000  | -0.64830000 | 13.75650000 |
|    |        | H  | 3.98040000  | 3.86540000  | 11.65460000 |
|    |        | H  | 4.96420000  | 3.63390000  | 9.56030000  |
|    |        | H  | 5.22820000  | 1.55210000  | 8.56590000  |
|    |        | H  | 2.51620000  | 3.07780000  | 14.65800000 |
|    |        | H  | 2.37220000  | 3.74560000  | 13.26550000 |
|    |        | H  | 3.77510000  | 3.58670000  | 13.90830000 |
|    |        | H  | 4.66770000  | -0.52510000 | 7.70460000  |
|    |        | H  | 6.01030000  | -0.73460000 | 8.45280000  |
|    |        | H  | 5.06910000  | -1.94020000 | 8.19720000  |
|    |        | H  | 2.43830000  | -0.14050000 | 14.37150000 |
|    |        | H  | 1.58320000  | -1.42200000 | 14.19020000 |
|    |        | H  | 1.20020000  | -0.12090000 | 13.43740000 |
|    |        | I  | 1.70580000  | -4.54220000 | 13.88450000 |
|    |        | I  | -2.98930000 | -4.57610000 | 10.42430000 |
|    |        | Te | -0.65020000 | -4.53010000 | 12.13400000 |
|    |        | O  | -0.73970000 | -7.67890000 | 13.17570000 |
|    |        | O  | 0.64710000  | -4.98910000 | 9.63470000  |
|    |        | C  | -0.04230000 | -6.39160000 | 11.35090000 |
|    |        | C  | -0.17020000 | -7.64430000 | 11.92870000 |
|    |        | C  | 0.27370000  | -8.76350000 | 11.25960000 |
|    |        | C  | 0.86190000  | -8.61500000 | 10.01880000 |
|    |        | C  | 1.01800000  | -7.39220000 | 9.42090000  |
|    |        | C  | 0.57320000  | -6.26950000 | 10.09470000 |
|    |        | C  | -0.88170000 | -8.94430000 | 13.80450000 |
|    |        | C  | 1.30230000  | -4.74500000 | 8.39390000  |
|    |        | C  | -1.87800000 | -5.10890000 | 13.75650000 |
|    |        | H  | 0.17940000  | -9.62250000 | 11.65460000 |
|    |        | H  | 1.16310000  | -9.39110000 | 9.56030000  |
|    |        | H  | 1.42720000  | -7.30930000 | 8.56590000  |
|    |        | H  | -1.28480000 | -8.83490000 | 14.65800000 |
|    |        | H  | -1.42890000 | -9.50280000 | 13.26550000 |
|    |        | H  | -0.02590000 | -9.34390000 | 13.90830000 |
|    |        | H  | 0.86660000  | -5.23210000 | 7.70460000  |

|    |        |    |             |             |             |
|----|--------|----|-------------|-------------|-------------|
|    |        | H  | 2.20920000  | -5.02250000 | 8.45280000  |
|    |        | H  | 1.26800000  | -3.81700000 | 8.19720000  |
|    |        | H  | -1.36270000 | -5.61670000 | 14.37150000 |
|    |        | H  | -2.21780000 | -4.33510000 | 14.19020000 |
|    |        | H  | -2.60090000 | -5.63620000 | 13.43740000 |
| 13 | WOPYIM | Te | 16.57750000 | 1.62020000  | 13.03370000 |
|    |        | I  | 16.60420000 | -1.28530000 | 12.33010000 |
|    |        | I  | 16.53060000 | 4.42360000  | 13.52020000 |
|    |        | C  | 14.48530000 | 1.66420000  | 12.65270000 |
|    |        | C  | 13.96410000 | 1.62850000  | 11.38650000 |
|    |        | H  | 14.53800000 | 1.54390000  | 10.63450000 |
|    |        | C  | 11.77170000 | 1.82780000  | 12.29140000 |
|    |        | H  | 10.83350000 | 1.90870000  | 12.16570000 |
|    |        | C  | 13.65570000 | 1.72820000  | 13.74370000 |
|    |        | H  | 14.01870000 | 1.70750000  | 14.62130000 |
|    |        | C  | 17.25740000 | 2.01590000  | 11.06410000 |
|    |        | H  | 16.89310000 | 2.87340000  | 10.76020000 |
|    |        | H  | 16.95550000 | 1.30320000  | 10.46510000 |
|    |        | H  | 18.23620000 | 2.05540000  | 11.05830000 |
|    |        | C  | 12.28780000 | 1.82220000  | 13.55860000 |
|    |        | H  | 11.70790000 | 1.88050000  | 14.30960000 |
|    |        | C  | 12.58520000 | 1.71870000  | 11.21120000 |
|    |        | H  | 12.21560000 | 1.70560000  | 10.33650000 |
| 14 | WUGVUQ | Te | 3.31200000  | 4.88940000  | 1.98800000  |
|    |        | I  | 6.27270000  | 5.19020000  | 1.74490000  |
|    |        | I  | 2.96750000  | 7.83360000  | 1.78540000  |
|    |        | I  | 0.45360000  | 4.50540000  | 2.03080000  |
|    |        | I  | 3.72930000  | 2.00320000  | 2.14300000  |
|    |        | C  | 3.37190000  | 5.07660000  | 4.13630000  |
|    |        | C  | 4.20720000  | 5.99590000  | 4.71360000  |
|    |        | H  | 4.77870000  | 6.51110000  | 4.19010000  |
|    |        | C  | 2.54730000  | 4.28090000  | 4.88880000  |
|    |        | H  | 2.00990000  | 3.63820000  | 4.48450000  |
|    |        | C  | 4.18440000  | 6.14510000  | 6.10870000  |
|    |        | H  | 4.74280000  | 6.76400000  | 6.52000000  |
|    |        | C  | 2.52860000  | 4.45290000  | 6.27460000  |
|    |        | H  | 1.96090000  | 3.93580000  | 6.80040000  |
|    |        | C  | 3.34170000  | 5.37980000  | 6.85650000  |
|    |        | H  | 3.32030000  | 5.49110000  | 7.77960000  |
|    |        | Te | 6.85370000  | 9.04710000  | 1.64270000  |
|    |        | C  | 7.76310000  | 10.95740000 | 1.91390000  |
|    |        | H  | 7.13960000  | 11.55160000 | 2.33690000  |
|    |        | H  | 8.01610000  | 11.31580000 | 1.05860000  |
|    |        | H  | 8.54240000  | 10.86520000 | 2.46540000  |
|    |        | C  | 8.53680000  | 8.17010000  | 0.73850000  |
|    |        | H  | 8.51370000  | 8.33450000  | -0.20800000 |
|    |        | H  | 8.53050000  | 7.22410000  | 0.89970000  |
|    |        | H  | 9.33550000  | 8.55220000  | 1.11000000  |
|    |        | C  | 7.25270000  | 8.48760000  | 3.64560000  |
|    |        | C  | 6.44990000  | 9.05230000  | 4.62010000  |
|    |        | H  | 5.72420000  | 9.58560000  | 4.38870000  |
|    |        | C  | 8.30760000  | 7.67480000  | 3.99150000  |
|    |        | H  | 8.83860000  | 7.28590000  | 3.33240000  |
|    |        | C  | 8.56610000  | 7.44560000  | 5.32350000  |
|    |        | H  | 9.28200000  | 6.90000000  | 5.55950000  |
|    |        | C  | 6.75910000  | 8.79940000  | 5.95910000  |
|    |        | H  | 6.24320000  | 9.18820000  | 6.62750000  |
|    |        | C  | 7.80630000  | 7.99130000  | 6.30500000  |
|    |        | H  | 7.99410000  | 7.81930000  | 7.20000000  |
| 15 | YODVUK | I  | 0.03730000  | -0.42520000 | 2.19980000  |
|    |        | Te | -0.44250000 | 4.51340000  | 2.31360000  |
|    |        | C  | -0.85460000 | 2.44660000  | 2.77460000  |
|    |        | C  | 0.09490000  | 1.69060000  | 2.28640000  |

|    |        |    |             |             |             |
|----|--------|----|-------------|-------------|-------------|
|    |        | C  | 1.32540000  | 2.22960000  | 1.61490000  |
|    |        | H  | 1.29730000  | 2.00360000  | 0.67150000  |
|    |        | H  | 2.10900000  | 1.80700000  | 1.99810000  |
|    |        | C  | 1.44820000  | 3.74620000  | 1.76540000  |
|    |        | H  | 1.73670000  | 4.14170000  | 0.92700000  |
|    |        | H  | 2.10340000  | 3.96090000  | 2.44710000  |
|    |        | C  | -2.11930000 | 2.12460000  | 3.45500000  |
|    |        | C  | -2.13310000 | 1.17980000  | 4.46290000  |
|    |        | H  | -1.34250000 | 0.76730000  | 4.72840000  |
|    |        | C  | -3.34790000 | 0.84530000  | 5.08130000  |
|    |        | H  | -3.37180000 | 0.19780000  | 5.74770000  |
|    |        | C  | -4.47160000 | 1.46800000  | 4.70310000  |
|    |        | H  | -5.27560000 | 1.23070000  | 5.10660000  |
|    |        | C  | -4.47390000 | 2.42400000  | 3.75970000  |
|    |        | H  | -5.26220000 | 2.86590000  | 3.53970000  |
|    |        | C  | -3.28450000 | 2.74610000  | 3.11480000  |
|    |        | H  | -3.28430000 | 3.39140000  | 2.44450000  |
|    |        | C  | 0.02180000  | 5.08310000  | 4.29210000  |
|    |        | C  | -0.43220000 | 6.29450000  | 4.76510000  |
|    |        | H  | -0.95620000 | 6.84040000  | 4.22510000  |
|    |        | C  | -0.10560000 | 6.69570000  | 6.05000000  |
|    |        | H  | -0.40180000 | 7.51620000  | 6.37370000  |
|    |        | C  | 0.65100000  | 5.88430000  | 6.83400000  |
|    |        | H  | 0.86620000  | 6.15100000  | 7.69900000  |
|    |        | C  | 1.09200000  | 4.69660000  | 6.37370000  |
|    |        | H  | 1.61870000  | 4.15640000  | 6.91750000  |
|    |        | C  | 0.76320000  | 4.27740000  | 5.09770000  |
|    |        | H  | 1.04880000  | 3.44670000  | 4.79170000  |
|    |        | I  | 0.96610000  | 7.36070000  | 1.25840000  |
| 16 | ZIQPEU | Te | 1.33230000  | 2.09000000  | 15.18170000 |
|    |        | I  | 1.14040000  | -0.71950000 | 15.39730000 |
|    |        | C  | 1.43270000  | 4.46210000  | 13.22390000 |
|    |        | C  | 0.58020000  | 5.21480000  | 15.37670000 |
|    |        | C  | 2.95970000  | 4.99420000  | 15.02000000 |
|    |        | N  | 1.63790000  | 4.46510000  | 14.70290000 |
|    |        | C  | 2.09010000  | 3.28410000  | 12.61200000 |
|    |        | C  | 2.67460000  | 3.37380000  | 11.28520000 |
|    |        | C  | 3.21550000  | 2.26330000  | 10.71610000 |
|    |        | C  | 3.28820000  | 1.06110000  | 11.34540000 |
|    |        | C  | 2.70710000  | 0.95730000  | 12.64370000 |
|    |        | C  | 2.15950000  | 2.07280000  | 13.26990000 |
|    |        | C  | 3.20330000  | 2.03150000  | 16.17720000 |
|    |        | C  | 3.17590000  | 2.19280000  | 17.55790000 |
|    |        | C  | 4.35960000  | 2.15040000  | 18.28550000 |
|    |        | C  | 5.56990000  | 1.94490000  | 17.63400000 |
|    |        | C  | 5.59730000  | 1.78360000  | 16.25330000 |
|    |        | C  | 4.41360000  | 1.82700000  | 15.52570000 |
|    |        | H  | 0.48310000  | 4.44190000  | 13.02740000 |
|    |        | H  | 1.80320000  | 5.27330000  | 12.84190000 |
|    |        | H  | 0.64180000  | 6.14190000  | 15.13570000 |
|    |        | H  | 0.67940000  | 5.12920000  | 16.32780000 |
|    |        | H  | -0.27630000 | 4.86720000  | 15.11030000 |
|    |        | H  | 3.00530000  | 5.91620000  | 14.75840000 |
|    |        | H  | 3.62590000  | 4.49430000  | 14.54600000 |
|    |        | H  | 3.11380000  | 4.91760000  | 15.96480000 |
|    |        | H  | 2.68190000  | 4.18400000  | 10.82860000 |
|    |        | H  | 3.55370000  | 2.32880000  | 9.85220000  |
|    |        | H  | 3.70410000  | 0.33150000  | 10.94440000 |
|    |        | H  | 2.69050000  | 0.13400000  | 13.07650000 |
|    |        | H  | 2.36740000  | 2.32980000  | 17.99390000 |
|    |        | H  | 4.34220000  | 2.25830000  | 19.20970000 |
|    |        | H  | 6.36180000  | 1.91660000  | 18.12070000 |
|    |        | H  | 6.40580000  | 1.64660000  | 15.81730000 |

|  |   |             |            |             |
|--|---|-------------|------------|-------------|
|  | H | 4.43360000  | 1.71810000 | 14.60150000 |
|  | I | -1.74260000 | 2.23610000 | 13.29050000 |
|  | I | -0.56610000 | 2.80240000 | 18.41390000 |

**Table S13.** CSD refcodes of the starting structures, energies (in Hartree) and coordinates of the optimized structures containing Te···I contacts(from calculation in dichloromethane).

|   | CSD Refcode | E(RM062X), Hartree | Coordinates                                                                                                                                                                                                                                                                                                                                                                                                                                                                                                                                                                                                                                                                                                                                                                                                                                                                                                                                                                                                                                                                                                                                                                                                                                                                                                                                                                                                                                                                       |
|---|-------------|--------------------|-----------------------------------------------------------------------------------------------------------------------------------------------------------------------------------------------------------------------------------------------------------------------------------------------------------------------------------------------------------------------------------------------------------------------------------------------------------------------------------------------------------------------------------------------------------------------------------------------------------------------------------------------------------------------------------------------------------------------------------------------------------------------------------------------------------------------------------------------------------------------------------------------------------------------------------------------------------------------------------------------------------------------------------------------------------------------------------------------------------------------------------------------------------------------------------------------------------------------------------------------------------------------------------------------------------------------------------------------------------------------------------------------------------------------------------------------------------------------------------|
| 1 | ATIDIQ      | -1327.20188221     | I -0.13746500 2.80479600 -0.00161300<br>I -4.19052300 -0.70427600 -0.11647800<br>Te -0.87303500 -0.64277400 -0.17420800<br>Te 4.43404300 -0.98173900 0.02653700<br>C 1.19038200 -0.79276100 -0.01467700<br>C 2.39948500 -0.87496300 -0.00870100<br>C 4.71967800 1.08999100 -0.40987300<br>H 4.26214600 1.68287400 0.37374200<br>H 5.79427900 1.25090300 -0.43095700<br>H 4.28357400 1.31321800 -1.37673600<br>C -1.01596300 -2.75810100 0.01206500<br>H -0.43683900 -3.06311800 0.87819200<br>H -2.06811300 -2.99822800 0.12467900<br>H -0.60957900 -3.19513600 -0.89549100<br>C -1.18092600 -0.22554500 1.87443700<br>H -0.20703600 -0.03548800 2.31377700<br>H -1.81505400 0.65235800 1.91957000<br>H -1.66838900 -1.09199400 2.31140400                                                                                                                                                                                                                                                                                                                                                                                                                                                                                                                                                                                                                                                                                                                                        |
| 2 | BIPFOV      | -2425.95354786     | Te -2.10363500 -0.03871100 -0.56773900<br>C -3.63306900 1.17635700 0.27596300<br>C -3.32210600 2.59897000 -0.10625700<br>C -4.22871900 3.62199900 0.16852400<br>C -3.93744200 4.93120500 -0.17690200<br>C -2.73282400 5.23119300 -0.80490100<br>C -1.82870200 4.21982200 -1.08357700<br>C -2.11467400 2.89997400 -0.73682300<br>C -1.12782800 1.80094900 -1.02828300<br>C -3.06154000 -0.11631200 -2.45588400<br>Te 2.11164100 -0.00725500 0.57345200<br>C 1.34207400 -1.91671100 1.12648400<br>C 2.43790600 -2.91566400 0.86424100<br>C 2.31873800 -4.23425700 1.30081900<br>C 3.32645200 -5.15114100 1.05125900<br>C 4.46886200 -4.75597500 0.36298200<br>C 4.59542500 -3.44675700 -0.07143200<br>C 3.58362500 -2.51931900 0.17266700<br>C 3.71412300 -1.09692700 -0.30437300<br>C 3.14236600 0.23257700 2.40810700<br>I 0.70081500 -1.22899300 -2.59687500<br>I -0.69845300 0.99092200 2.68463100<br>I -4.63479300 -2.47849900 0.26796600<br>I 4.23549200 2.68322100 -0.48434500<br>H -3.61191800 1.01604400 1.35183600<br>H -4.58387300 0.82107100 -0.11701300<br>H -5.16490600 3.38417300 0.65766700<br>H -4.64721100 5.71766300 0.04173900<br>H -2.50053400 6.25210200 -1.07645900<br>H -0.88904800 4.44859100 -1.57030500<br>H -0.24045200 1.87156700 -0.40168600<br>H -0.82023800 1.76179500 -2.07181100<br>H -3.42235500 0.88391800 -2.68456800<br>H -2.32465800 -0.44592500 -3.18202500<br>H -3.88101100 -0.82361900 -2.37190600<br>H 0.46060700 -2.09929800 0.51301700 |

|   |        |                |    |             |             |             |
|---|--------|----------------|----|-------------|-------------|-------------|
|   |        |                | H  | 1.04265800  | -1.86680200 | 2.17164800  |
|   |        |                | H  | 1.42806000  | -4.53662100 | 1.83688000  |
|   |        |                | H  | 3.22386100  | -6.17199100 | 1.39383100  |
|   |        |                | H  | 5.25960700  | -5.46786400 | 0.16808300  |
|   |        |                | H  | 5.48379400  | -3.13495900 | -0.60610100 |
|   |        |                | H  | 3.60525600  | -1.00423400 | -1.38317700 |
|   |        |                | H  | 4.64312700  | -0.62080000 | 0.00368300  |
|   |        |                | H  | 3.86880300  | 1.02733000  | 2.26652800  |
|   |        |                | H  | 2.40716900  | 0.49712000  | 3.16197900  |
|   |        |                | H  | 3.62868900  | -0.71152100 | 2.64238700  |
| 3 | BIPTEI | -3247.17839335 | I  | -3.61373400 | 2.04518800  | 1.88517300  |
|   |        |                | I  | -1.74992300 | 2.30479900  | -1.64045200 |
|   |        |                | I  | -0.88409100 | -1.57474900 | -1.76533000 |
|   |        |                | Te | -2.23325900 | 0.28862500  | 0.07036500  |
|   |        |                | C  | -4.10518100 | -0.40125000 | -0.66097500 |
|   |        |                | C  | -4.90080500 | 0.39886700  | -1.46679100 |
|   |        |                | C  | -6.08649900 | -0.11416400 | -1.97080600 |
|   |        |                | C  | -6.46156300 | -1.41699900 | -1.67105900 |
|   |        |                | C  | -5.66418400 | -2.20225100 | -0.85415600 |
|   |        |                | C  | -4.47530500 | -1.70617600 | -0.32046000 |
|   |        |                | C  | -3.64048300 | -2.54897400 | 0.56668000  |
|   |        |                | C  | -3.23296900 | -3.81749900 | 0.15536100  |
|   |        |                | C  | -2.39217000 | -4.57449700 | 0.95400200  |
|   |        |                | C  | -1.94584800 | -4.07597400 | 2.17424200  |
|   |        |                | C  | -2.36635000 | -2.82787100 | 2.60571600  |
|   |        |                | C  | -3.22173600 | -2.07143100 | 1.81074400  |
|   |        |                | H  | -4.60686300 | 1.41020600  | -1.71180000 |
|   |        |                | H  | -6.71026900 | 0.50417900  | -2.60088200 |
|   |        |                | H  | -7.38302100 | -1.81993400 | -2.06802500 |
|   |        |                | H  | -5.96583200 | -3.21087400 | -0.60349800 |
|   |        |                | H  | -3.54943500 | -4.18984800 | -0.81019900 |
|   |        |                | H  | -2.06877500 | -5.55019000 | 0.61800200  |
|   |        |                | H  | -1.28046800 | -4.66649400 | 2.78926600  |
|   |        |                | H  | -2.04674900 | -2.44351700 | 3.56465200  |
|   |        |                | H  | -3.61078600 | -1.13141300 | 2.18898800  |
|   |        |                | I  | 3.61373400  | -2.04528300 | -1.88515200 |
|   |        |                | I  | 1.74994500  | -2.30472300 | 1.64044300  |
|   |        |                | I  | 0.88411000  | 1.57472800  | 1.76529300  |
|   |        |                | Te | 2.23326500  | -0.28864100 | -0.07041000 |
|   |        |                | C  | 4.10516000  | 0.40121700  | 0.66091800  |
|   |        |                | C  | 4.90075600  | -0.39892600 | 1.46673200  |
|   |        |                | C  | 6.08644100  | 0.11408600  | 1.97078200  |
|   |        |                | C  | 6.46150600  | 1.41693400  | 1.67109300  |
|   |        |                | C  | 5.66414000  | 2.20222000  | 0.85420900  |
|   |        |                | C  | 4.47527800  | 1.70616300  | 0.32046000  |
|   |        |                | C  | 3.64045500  | 2.54902600  | -0.56662600 |
|   |        |                | C  | 3.23291700  | 3.81751300  | -0.15521000 |
|   |        |                | C  | 2.39212500  | 4.57456900  | -0.95380700 |
|   |        |                | C  | 1.94582300  | 4.07614100  | -2.17409300 |
|   |        |                | C  | 2.36636300  | 2.82808500  | -2.60566900 |
|   |        |                | C  | 3.22176500  | 2.07160300  | -1.81075500 |
|   |        |                | H  | 4.60679100  | -1.41026600 | 1.71171600  |
|   |        |                | H  | 6.71019400  | -0.50427900 | 2.60085300  |
|   |        |                | H  | 7.38295200  | 1.81985800  | 2.06809900  |
|   |        |                | H  | 5.96578400  | 3.21085800  | 0.60360800  |
|   |        |                | H  | 3.54935700  | 4.18978400  | 0.81038800  |
|   |        |                | H  | 2.06870600  | 5.55022800  | -0.61772900 |
|   |        |                | H  | 1.28044400  | 4.66669900  | -2.78908100 |
|   |        |                | H  | 2.04678800  | 2.44380300  | -3.56464200 |
|   |        |                | H  | 3.61087500  | 1.13165100  | -2.18910100 |
| 4 | CIFLEI | -2653.04495780 | Te | 2.77624200  | 0.05553900  | -0.53954500 |
|   |        |                | I  | 1.80384300  | 2.78432400  | -0.46996400 |
|   |        |                | C  | 1.70083600  | -0.43487900 | 1.21693800  |

|   |        |                |    |             |             |             |
|---|--------|----------------|----|-------------|-------------|-------------|
|   |        |                | C  | 1.76047800  | 0.40369000  | 2.32154000  |
|   |        |                | C  | 1.03292600  | 0.07655900  | 3.45917700  |
|   |        |                | C  | 0.24527500  | -1.06667400 | 3.47957100  |
|   |        |                | C  | 0.19412500  | -1.89711800 | 2.36718700  |
|   |        |                | C  | 0.92585300  | -1.58779800 | 1.22992700  |
|   |        |                | H  | 2.35877400  | 1.30545300  | 2.30341000  |
|   |        |                | H  | 1.08111100  | 0.72194400  | 4.32578400  |
|   |        |                | H  | -0.32788600 | -1.31316600 | 4.36329400  |
|   |        |                | H  | -0.41541500 | -2.78940400 | 2.37873800  |
|   |        |                | H  | 0.88749200  | -2.24486000 | 0.37236600  |
|   |        |                | I  | 3.81108800  | -2.67170600 | -0.68974000 |
|   |        |                | C  | 4.57222900  | 0.66474000  | 0.39590600  |
|   |        |                | C  | 5.00350100  | 0.05648400  | 1.56726000  |
|   |        |                | C  | 5.33018600  | 1.64672600  | -0.22815200 |
|   |        |                | C  | 6.20857100  | 0.45439000  | 2.12901800  |
|   |        |                | H  | 4.41793400  | -0.72276500 | 2.03736000  |
|   |        |                | C  | 6.54020900  | 2.02730700  | 0.33633700  |
|   |        |                | H  | 4.98536700  | 2.12328600  | -1.13656500 |
|   |        |                | C  | 6.97572900  | 1.43571800  | 1.51423300  |
|   |        |                | H  | 6.54827500  | -0.00874200 | 3.04512900  |
|   |        |                | H  | 7.13739600  | 2.78928600  | -0.14498700 |
|   |        |                | H  | 7.91598000  | 1.73874500  | 1.95416100  |
|   |        |                | Te | -3.24973100 | -0.11820700 | -0.88326600 |
|   |        |                | I  | -5.91771100 | 0.40138000  | 0.11015400  |
|   |        |                | C  | -2.99261400 | -1.65514900 | 0.54386400  |
|   |        |                | C  | -3.31195400 | -1.43190300 | 1.87735000  |
|   |        |                | C  | -3.26125900 | -2.49402600 | 2.76873700  |
|   |        |                | C  | -2.91010800 | -3.76292700 | 2.32464900  |
|   |        |                | C  | -2.58365500 | -3.97122700 | 0.99139800  |
|   |        |                | C  | -2.61918500 | -2.91381400 | 0.09096200  |
|   |        |                | H  | -3.61238100 | -0.45082300 | 2.22099200  |
|   |        |                | H  | -3.50610400 | -2.32815900 | 3.80879200  |
|   |        |                | H  | -2.88443400 | -4.58977200 | 3.02122800  |
|   |        |                | H  | -2.30334500 | -4.95624500 | 0.64507900  |
|   |        |                | H  | -2.35967900 | -3.07934800 | -0.94631100 |
|   |        |                | I  | -0.60299800 | -0.61616000 | -2.03527900 |
|   |        |                | C  | -2.51598900 | 1.51525900  | 0.22664600  |
|   |        |                | C  | -1.54814200 | 1.34779700  | 1.20774200  |
|   |        |                | C  | -3.03546100 | 2.76716000  | -0.07978500 |
|   |        |                | C  | -1.11976200 | 2.46417600  | 1.91421600  |
|   |        |                | H  | -1.12558000 | 0.37287800  | 1.42367100  |
|   |        |                | C  | -2.58177900 | 3.87440600  | 0.62175000  |
|   |        |                | H  | -3.79509300 | 2.88567300  | -0.84150200 |
|   |        |                | C  | -1.63340200 | 3.72018700  | 1.62407500  |
|   |        |                | H  | -0.36964100 | 2.34826300  | 2.68360600  |
|   |        |                | H  | -2.97763900 | 4.85310200  | 0.38886800  |
|   |        |                | H  | -1.28707800 | 4.58341700  | 2.17572000  |
| 5 | CIFLOS | -2785.09484875 | Te | -0.01658200 | -0.54155200 | 2.29064200  |
|   |        |                | I  | -2.16049200 | -0.76500700 | 0.02924300  |
|   |        |                | I  | 2.15841200  | -0.76573400 | -0.02862500 |
|   |        |                | I  | -1.99133600 | -0.64265800 | 4.21863000  |
|   |        |                | I  | 2.04747900  | -0.33615000 | 4.13981900  |
|   |        |                | C  | -0.13295700 | 1.56675800  | 2.02244200  |
|   |        |                | C  | 1.03364900  | 2.28600000  | 1.79929800  |
|   |        |                | C  | 0.95348800  | 3.66272300  | 1.64142900  |
|   |        |                | C  | -0.27355700 | 4.30592500  | 1.71330000  |
|   |        |                | C  | -1.43200400 | 3.57322900  | 1.92898600  |
|   |        |                | C  | -1.36972900 | 2.19549800  | 2.07958900  |
|   |        |                | H  | 1.99647000  | 1.79676600  | 1.75329800  |
|   |        |                | H  | 1.85771800  | 4.22817000  | 1.46315700  |
|   |        |                | H  | -0.32785300 | 5.37944800  | 1.59290500  |
|   |        |                | H  | -2.39171300 | 4.06864400  | 1.97955400  |
|   |        |                | H  | -2.27839100 | 1.63404200  | 2.24371700  |



|   |        |                |    |             |             |             |
|---|--------|----------------|----|-------------|-------------|-------------|
|   |        |                | Te | 0.01449800  | -0.54201800 | -2.29011100 |
|   |        |                | I  | -2.04958600 | -0.33640800 | -4.13919300 |
|   |        |                | I  | 1.98916100  | -0.64388900 | -4.21814400 |
|   |        |                | C  | 0.13144300  | 1.56630200  | -2.02226200 |
|   |        |                | C  | 1.36842200  | 2.19463200  | -2.07949100 |
|   |        |                | C  | -1.03494300 | 2.28597900  | -1.79938300 |
|   |        |                | C  | 1.43113800  | 3.57237800  | -1.92921600 |
|   |        |                | H  | 2.27691300  | 1.63284500  | -2.24343600 |
|   |        |                | C  | -0.95434100 | 3.66271100  | -1.64181700 |
|   |        |                | H  | -1.99792700 | 1.79707000  | -1.75334000 |
|   |        |                | C  | 0.27291600  | 4.30550100  | -1.71377100 |
|   |        |                | H  | 2.39101000  | 4.06747100  | -1.97983900 |
|   |        |                | H  | -1.85840100 | 4.22849300  | -1.46374100 |
|   |        |                | H  | 0.32755100  | 5.37903600  | -1.59363800 |
| 6 | CIFLUY | -2785.09172990 | Te | -0.05646600 | 2.29222900  | -0.00001300 |
|   |        |                | I  | 0.07806000  | -0.01221900 | 2.15694600  |
|   |        |                | I  | -0.04261400 | 4.17848800  | 2.02620300  |
|   |        |                | C  | -2.17594200 | 2.09217800  | -0.00000700 |
|   |        |                | C  | -2.85216800 | 2.01780200  | 1.21038900  |
|   |        |                | C  | -4.23147600 | 1.86449900  | 1.20245200  |
|   |        |                | C  | -4.92016700 | 1.78677800  | 0.00000000  |
|   |        |                | H  | -2.32760100 | 2.07926000  | 2.15330200  |
|   |        |                | H  | -4.76297300 | 1.80699400  | 2.14207100  |
|   |        |                | H  | -5.99494600 | 1.66804800  | 0.00000200  |
|   |        |                | I  | 0.07805900  | -0.01224100 | -2.15694900 |
|   |        |                | I  | -0.04263000 | 4.17847000  | -2.02624500 |
|   |        |                | Te | 0.07568500  | -2.32216700 | 0.00001000  |
|   |        |                | C  | -2.85217800 | 2.01784400  | -1.21040000 |
|   |        |                | C  | -4.23148600 | 1.86454100  | -1.20245600 |
|   |        |                | I  | -0.04247100 | -4.20449700 | -2.02720500 |
|   |        |                | I  | -0.04245900 | -4.20447500 | 2.02724700  |
|   |        |                | C  | 2.20274600  | -2.24491100 | 0.00000600  |
|   |        |                | H  | -2.32762000 | 2.07933500  | -2.15331600 |
|   |        |                | H  | -4.76299100 | 1.80706900  | -2.14207300 |
|   |        |                | C  | 2.88193000  | -2.20974900 | -1.21029300 |
|   |        |                | C  | 2.88193500  | -2.20977600 | 1.21030300  |
|   |        |                | C  | 4.26770800  | -2.13598500 | -1.20246700 |
|   |        |                | H  | 2.35391800  | -2.24198600 | -2.15266700 |
|   |        |                | C  | 4.26771300  | -2.13601200 | 1.20247300  |
|   |        |                | H  | 2.35392700  | -2.24203500 | 2.15267900  |
|   |        |                | C  | 4.95968300  | -2.09779400 | 0.00000200  |
|   |        |                | H  | 4.80166500  | -2.10931300 | -2.14206400 |
|   |        |                | H  | 4.80167500  | -2.10936100 | 2.14206900  |
|   |        |                | H  | 6.03948400  | -2.04101500 | 0.00000000  |
| 7 | GEHDON | -4036.41616351 | I  | -0.45360200 | -1.89290100 | -1.76903900 |
|   |        |                | I  | -4.03331100 | 1.45824500  | 1.40422100  |
|   |        |                | Te | -2.27044700 | -0.25937600 | -0.15420500 |
|   |        |                | I  | -1.67384900 | -1.87322400 | 2.15794000  |
|   |        |                | S  | -2.93395300 | 1.14956600  | -2.38721200 |
|   |        |                | C  | -1.81682200 | 4.42232300  | -0.42272500 |
|   |        |                | H  | -1.13804800 | 5.11832300  | -0.91134500 |
|   |        |                | H  | -1.60754100 | 4.40377400  | 0.64437800  |
|   |        |                | C  | -3.29900100 | 4.73401400  | -0.72936200 |
|   |        |                | H  | -3.90815300 | 4.71964000  | 0.17256200  |
|   |        |                | H  | -3.42884200 | 5.68362400  | -1.24011400 |
|   |        |                | C  | -3.90351900 | -1.52730200 | -0.67754300 |
|   |        |                | N  | -1.65842900 | 3.08483900  | -0.99216900 |
|   |        |                | H  | -0.77157500 | 2.60018200  | -1.04761400 |
|   |        |                | C  | -2.73875100 | 2.68298200  | -1.63314100 |
|   |        |                | C  | -6.04916100 | -3.12901800 | -1.37112800 |
|   |        |                | H  | -6.88762900 | -3.75605300 | -1.64170500 |
|   |        |                | C  | -5.87636600 | -2.73191600 | -0.05251700 |
|   |        |                | H  | -6.57694800 | -3.04586500 | 0.70884900  |

|   |        |                |    |             |             |             |
|---|--------|----------------|----|-------------|-------------|-------------|
|   |        |                | C  | -4.06510800 | -1.92011600 | -1.99968800 |
|   |        |                | H  | -3.35995800 | -1.62518200 | -2.76457100 |
|   |        |                | C  | -4.80280700 | -1.92630300 | 0.30144900  |
|   |        |                | H  | -4.67884400 | -1.61895700 | 1.33024900  |
|   |        |                | C  | -5.14485900 | -2.72236900 | -2.34218000 |
|   |        |                | H  | -5.27197800 | -3.02919700 | -3.37110700 |
|   |        |                | N  | -3.68039900 | 3.61586100  | -1.59700500 |
|   |        |                | H  | -4.63355800 | 3.40180700  | -1.84048800 |
|   |        |                | I  | 0.45360300  | 1.89290500  | 1.76903600  |
|   |        |                | I  | 4.03330900  | -1.45825100 | -1.40421400 |
|   |        |                | Te | 2.27044800  | 0.25937600  | 0.15420400  |
|   |        |                | I  | 1.67385300  | 1.87322000  | -2.15794400 |
|   |        |                | S  | 2.93394900  | -1.14956400 | 2.38721200  |
|   |        |                | C  | 1.81682300  | -4.42232300 | 0.42272500  |
|   |        |                | H  | 1.13805200  | -5.11832200 | 0.91134800  |
|   |        |                | H  | 1.60754000  | -4.40377700 | -0.64437800 |
|   |        |                | C  | 3.29900300  | -4.73401100 | 0.72935900  |
|   |        |                | H  | 3.90815400  | -4.71963300 | -0.17256600 |
|   |        |                | H  | 3.42884800  | -5.68362100 | 1.24010900  |
|   |        |                | C  | 3.90351800  | 1.52730300  | 0.67754300  |
|   |        |                | N  | 1.65843000  | -3.08483800 | 0.99216500  |
|   |        |                | H  | 0.77157500  | -2.60018200 | 1.04761100  |
|   |        |                | C  | 2.73875100  | -2.68297900 | 1.63313900  |
|   |        |                | C  | 6.04915500  | 3.12902500  | 1.37113100  |
|   |        |                | H  | 6.88762100  | 3.75606100  | 1.64170900  |
|   |        |                | C  | 5.87636700  | 2.73191600  | 0.05252100  |
|   |        |                | H  | 6.57695300  | 3.04586100  | -0.70884300 |
|   |        |                | C  | 4.06509800  | 1.92012600  | 1.99968700  |
|   |        |                | H  | 3.35994200  | 1.62519900  | 2.76456700  |
|   |        |                | C  | 4.80281000  | 1.92630100  | -0.30144600 |
|   |        |                | H  | 4.67885200  | 1.61894900  | -1.33024600 |
|   |        |                | C  | 5.14484700  | 2.72238200  | 2.34218000  |
|   |        |                | H  | 5.27196000  | 3.02921600  | 3.37110600  |
|   |        |                | N  | 3.68040000  | -3.61585800 | 1.59700300  |
|   |        |                | H  | 4.63355900  | -3.40180200 | 1.84048600  |
| 8 | GIPRUT | -1495.19030044 | C  | 0.23280900  | 1.05578700  | 0.34399800  |
|   |        |                | C  | -0.94929700 | 1.67139100  | 0.78530300  |
|   |        |                | C  | -0.86021300 | 2.70807600  | 1.71081000  |
|   |        |                | H  | -1.77241800 | 3.17799200  | 2.05621800  |
|   |        |                | C  | 0.36948800  | 3.14057800  | 2.18175300  |
|   |        |                | H  | 0.42168400  | 3.95183600  | 2.89544500  |
|   |        |                | C  | 1.53085500  | 2.53050900  | 1.73808600  |
|   |        |                | H  | 2.49538500  | 2.85994800  | 2.10324300  |
|   |        |                | C  | 1.48199800  | 1.48121500  | 0.82210400  |
|   |        |                | C  | -2.30362000 | 1.24986200  | 0.32490700  |
|   |        |                | C  | -2.81139400 | 1.72171700  | -0.89317500 |
|   |        |                | C  | -4.07668400 | 1.31401600  | -1.29640200 |
|   |        |                | H  | -4.47080700 | 1.67880300  | -2.23844800 |
|   |        |                | C  | -4.85207900 | 0.45637800  | -0.52066100 |
|   |        |                | C  | -4.34059900 | 0.02957300  | 0.69743700  |
|   |        |                | H  | -4.93701500 | -0.62370900 | 1.32449600  |
|   |        |                | C  | -3.07895400 | 0.42018200  | 1.14040400  |
|   |        |                | C  | -2.00937900 | 2.66038500  | -1.75165800 |
|   |        |                | H  | -1.63524100 | 3.50472200  | -1.17142400 |
|   |        |                | H  | -2.61209500 | 3.04255900  | -2.57309100 |
|   |        |                | H  | -1.13964300 | 2.15575500  | -2.17933000 |
|   |        |                | C  | -6.20073000 | -0.00412000 | -1.00104300 |
|   |        |                | H  | -6.82102000 | -0.34017200 | -0.17174700 |
|   |        |                | H  | -6.09588400 | -0.83857100 | -1.69699100 |
|   |        |                | H  | -6.72489900 | 0.79419400  | -1.52539100 |
|   |        |                | C  | -2.58696900 | -0.02459700 | 2.49196400  |
|   |        |                | H  | -1.53040700 | -0.29067800 | 2.46834900  |
|   |        |                | H  | -3.15155200 | -0.88729700 | 2.84169600  |

|    |        |                |    |             |             |             |
|----|--------|----------------|----|-------------|-------------|-------------|
|    |        |                | H  | -2.70228400 | 0.77590600  | 3.22620900  |
|    |        |                | C  | 2.76719700  | 0.85343600  | 0.39828500  |
|    |        |                | C  | 3.27736000  | -0.22681500 | 1.12711500  |
|    |        |                | C  | 4.47485900  | -0.80447400 | 0.72245100  |
|    |        |                | H  | 4.86722900  | -1.64710800 | 1.28079300  |
|    |        |                | C  | 5.17765400  | -0.33381600 | -0.38253900 |
|    |        |                | C  | 4.65036100  | 0.74039200  | -1.08913500 |
|    |        |                | H  | 5.18012600  | 1.11651100  | -1.95706700 |
|    |        |                | C  | 3.45338800  | 1.34473200  | -0.71512200 |
|    |        |                | C  | 2.52781300  | -0.77038300 | 2.31260600  |
|    |        |                | H  | 3.05849700  | -1.61084900 | 2.75513500  |
|    |        |                | H  | 1.53086000  | -1.10913400 | 2.02026000  |
|    |        |                | H  | 2.39133900  | -0.00479600 | 3.07806600  |
|    |        |                | C  | 6.48636800  | -0.95753200 | -0.78265400 |
|    |        |                | H  | 6.71071900  | -0.76431700 | -1.83041300 |
|    |        |                | H  | 6.47231600  | -2.03516900 | -0.62395400 |
|    |        |                | H  | 7.30518800  | -0.54953400 | -0.18696600 |
|    |        |                | C  | 2.89732300  | 2.49079600  | -1.51684100 |
|    |        |                | H  | 2.71878100  | 3.36475600  | -0.88916100 |
|    |        |                | H  | 1.93718600  | 2.22876300  | -1.96918700 |
|    |        |                | H  | 3.57901100  | 2.77145300  | -2.31687200 |
|    |        |                | Te | 0.18354100  | -0.45814800 | -1.14727600 |
|    |        |                | I  | -0.87102900 | -2.51664000 | 0.26133000  |
| 9  | GOCROI | -1608.82939033 | Te | 0.65560500  | 0.11555400  | 0.31023800  |
|    |        |                | N  | -2.84033600 | 0.24341200  | 0.01549500  |
|    |        |                | N  | -2.12358400 | -0.68129500 | -0.62421100 |
|    |        |                | N  | -2.89477100 | -1.47108900 | -1.27820700 |
|    |        |                | C  | 2.14286600  | 0.57548400  | 1.74108000  |
|    |        |                | H  | 2.79634800  | -0.28823200 | 1.81113900  |
|    |        |                | H  | 1.66610800  | 0.80331600  | 2.69098300  |
|    |        |                | H  | 2.67963900  | 1.44037200  | 1.36565100  |
|    |        |                | C  | -4.18661200 | -1.05622500 | -1.07929400 |
|    |        |                | C  | -5.40162000 | -1.56473600 | -1.55927200 |
|    |        |                | H  | -5.42436900 | -2.42996600 | -2.20666700 |
|    |        |                | C  | -6.54747000 | -0.91442500 | -1.17162500 |
|    |        |                | H  | -7.50789700 | -1.26945400 | -1.51847900 |
|    |        |                | C  | -6.50707100 | 0.21978500  | -0.32553900 |
|    |        |                | H  | -7.43779500 | 0.69809700  | -0.05271100 |
|    |        |                | C  | -5.32561400 | 0.73211500  | 0.15465800  |
|    |        |                | H  | -5.30073200 | 1.60261700  | 0.79431900  |
|    |        |                | C  | -4.16063200 | 0.06308400  | -0.24130400 |
|    |        |                | C  | -2.18221300 | 1.29362400  | 0.77862800  |
|    |        |                | H  | -2.92184700 | 1.67890000  | 1.47978700  |
|    |        |                | H  | -1.89274000 | 2.10628000  | 0.11082300  |
|    |        |                | C  | -0.97951200 | 0.78296500  | 1.54770000  |
|    |        |                | H  | -1.24077400 | -0.04410600 | 2.20555700  |
|    |        |                | H  | -0.56533000 | 1.60507700  | 2.12555700  |
|    |        |                | C  | 0.46399900  | -1.90936000 | 0.89131800  |
|    |        |                | C  | 0.18379800  | -2.85557200 | -0.08660800 |
|    |        |                | H  | 0.07118400  | -2.55754700 | -1.12091300 |
|    |        |                | C  | 0.04924700  | -4.18990600 | 0.26960400  |
|    |        |                | H  | -0.16689300 | -4.92800800 | -0.49071900 |
|    |        |                | C  | 0.19560500  | -4.57544100 | 1.59642700  |
|    |        |                | H  | 0.09364000  | -5.61676400 | 1.87066800  |
|    |        |                | C  | 0.47527600  | -3.62694200 | 2.57028700  |
|    |        |                | H  | 0.59161000  | -3.92440700 | 3.60364300  |
|    |        |                | C  | 0.60997100  | -2.28889300 | 2.21926000  |
|    |        |                | H  | 0.83132400  | -1.55836100 | 2.98769200  |
|    |        |                | I  | 0.75142300  | 3.70278900  | 0.05900000  |
|    |        |                | I  | 3.61966800  | -1.13820700 | -1.23658900 |
| 10 | LADXEV | -3249.99612199 | Te | -1.87213500 | 0.08798900  | 1.32150300  |
|    |        |                | I  | 1.03163700  | 1.20622300  | 1.53141400  |
|    |        |                | I  | -2.47571800 | 1.23494300  | 3.74089400  |

|    |        |                |    |             |             |             |
|----|--------|----------------|----|-------------|-------------|-------------|
|    |        |                | I  | -4.50800100 | -0.69390200 | 0.84340300  |
|    |        |                | C  | -1.77452400 | -2.96256800 | 1.66282300  |
|    |        |                | H  | -2.46623800 | -2.96686400 | 0.83218000  |
|    |        |                | O  | -2.50056000 | 2.81044500  | 0.46264000  |
|    |        |                | C  | -1.29397200 | -1.77068800 | 2.19203100  |
|    |        |                | C  | -0.40247900 | -1.77318200 | 3.25867000  |
|    |        |                | H  | -0.02849400 | -0.84851000 | 3.67662700  |
|    |        |                | C  | -3.85972600 | 3.25534200  | 0.42039700  |
|    |        |                | H  | -3.91040700 | 4.29561200  | 0.75412400  |
|    |        |                | H  | -4.44054700 | 2.63570500  | 1.10400000  |
|    |        |                | C  | -1.35938100 | -4.16755500 | 2.21328000  |
|    |        |                | H  | -1.73586000 | -5.09512900 | 1.80475400  |
|    |        |                | C  | -0.46422500 | -4.18012800 | 3.27403600  |
|    |        |                | H  | -0.14016900 | -5.12116500 | 3.69722100  |
|    |        |                | C  | 0.01289100  | -2.98453500 | 3.79433600  |
|    |        |                | H  | 0.70731500  | -2.98811800 | 4.62328700  |
|    |        |                | C  | -4.27507000 | 3.12326600  | -1.03509800 |
|    |        |                | H  | -5.11764300 | 3.76139300  | -1.29164900 |
|    |        |                | H  | -4.53817900 | 2.08621600  | -1.25264800 |
|    |        |                | C  | -2.97917000 | 3.50391500  | -1.75145300 |
|    |        |                | H  | -2.92194900 | 3.13222500  | -2.77215400 |
|    |        |                | H  | -2.86200800 | 4.58824000  | -1.77140700 |
|    |        |                | C  | -1.92360100 | 2.87038500  | -0.85135300 |
|    |        |                | H  | -0.99272600 | 3.43567400  | -0.80434900 |
|    |        |                | H  | -1.69072500 | 1.85154200  | -1.17679600 |
|    |        |                | Te | 1.87213500  | -0.08798900 | -1.32150300 |
|    |        |                | I  | -1.03163700 | -1.20622300 | -1.53141400 |
|    |        |                | I  | 2.47571800  | -1.23494300 | -3.74089400 |
|    |        |                | I  | 4.50800100  | 0.69390200  | -0.84340300 |
|    |        |                | C  | 1.77452400  | 2.96256800  | -1.66282300 |
|    |        |                | H  | 2.46623800  | 2.96686400  | -0.83218000 |
|    |        |                | O  | 2.50056000  | -2.81044500 | -0.46264000 |
|    |        |                | C  | 1.29397200  | 1.77068800  | -2.19203100 |
|    |        |                | C  | 0.40247900  | 1.77318200  | -3.25867000 |
|    |        |                | H  | 0.02849400  | 0.84851000  | -3.67662700 |
|    |        |                | C  | 3.85972600  | -3.25534200 | -0.42039700 |
|    |        |                | H  | 3.91040700  | -4.29561200 | -0.75412400 |
|    |        |                | H  | 4.44054700  | -2.63570500 | -1.10400000 |
|    |        |                | C  | 1.35938100  | 4.16755500  | -2.21328000 |
|    |        |                | H  | 1.73586000  | 5.09512900  | -1.80475400 |
|    |        |                | C  | 0.46422500  | 4.18012800  | -3.27403600 |
|    |        |                | H  | 0.14016900  | 5.12116500  | -3.69722100 |
|    |        |                | C  | -0.01289100 | 2.98453500  | -3.79433600 |
|    |        |                | H  | -0.70731500 | 2.98811800  | -4.62328700 |
|    |        |                | C  | 4.27507000  | -3.12326600 | 1.03509800  |
|    |        |                | H  | 5.11764300  | -3.76139300 | 1.29164900  |
|    |        |                | H  | 4.53817900  | -2.08621600 | 1.25264800  |
|    |        |                | C  | 2.97917000  | -3.50391500 | 1.75145300  |
|    |        |                | H  | 2.92194900  | -3.13222500 | 2.77215400  |
|    |        |                | H  | 2.86200800  | -4.58824000 | 1.77140700  |
|    |        |                | C  | 1.92360100  | -2.87038500 | 0.85135300  |
|    |        |                | H  | 0.99272600  | -3.43567400 | 0.80434900  |
|    |        |                | H  | 1.69072500  | -1.85154200 | 1.17679600  |
| 11 | MECGOR | -3380.75220959 | I  | -2.43393300 | 2.89975000  | 0.25245200  |
|    |        |                | I  | -4.22800500 | 0.24006100  | -2.33869200 |
|    |        |                | I  | -0.58586400 | -0.22868400 | 2.22635100  |
|    |        |                | I  | -2.36092800 | -2.91034500 | -0.44592900 |
|    |        |                | Te | -2.44259200 | -0.01221000 | -0.03940500 |
|    |        |                | C  | -4.10425800 | -0.20349100 | 1.29589200  |
|    |        |                | C  | -4.08151500 | -1.18439200 | 2.27921500  |
|    |        |                | H  | -3.23969900 | -1.85559800 | 2.37326000  |
|    |        |                | C  | -5.15469800 | -1.30060200 | 3.15195600  |
|    |        |                | H  | -5.13438600 | -2.06289300 | 3.91887700  |

|    |        |                |    |             |             |             |
|----|--------|----------------|----|-------------|-------------|-------------|
|    |        |                | C  | -6.24185100 | -0.44474800 | 3.04180300  |
|    |        |                | H  | -7.07527200 | -0.53746700 | 3.72509100  |
|    |        |                | C  | -6.25723800 | 0.53067000  | 2.05468300  |
|    |        |                | H  | -7.10082400 | 1.20110200  | 1.96274900  |
|    |        |                | C  | -5.18806300 | 0.65614300  | 1.17739500  |
|    |        |                | H  | -5.20769100 | 1.41978000  | 0.41272300  |
|    |        |                | I  | 2.43382100  | -2.89972700 | -0.25242400 |
|    |        |                | I  | 4.22805200  | -0.24012400 | 2.33864400  |
|    |        |                | I  | 0.58585800  | 0.22876200  | -2.22633700 |
|    |        |                | I  | 2.36101900  | 2.91035900  | 0.44593100  |
|    |        |                | Te | 2.44259100  | 0.01222300  | 0.03940600  |
|    |        |                | C  | 4.10423300  | 0.20344300  | -1.29589100 |
|    |        |                | C  | 4.08157000  | 1.18442000  | -2.27913800 |
|    |        |                | H  | 3.23982000  | 1.85571700  | -2.37312400 |
|    |        |                | C  | 5.15475800  | 1.30059700  | -3.15187800 |
|    |        |                | H  | 5.13450800  | 2.06294800  | -3.91874000 |
|    |        |                | C  | 6.24183200  | 0.44463400  | -3.04179800 |
|    |        |                | H  | 7.07525700  | 0.53733000  | -3.72508400 |
|    |        |                | C  | 6.25713300  | -0.53086400 | -2.05475500 |
|    |        |                | H  | 7.10065600  | -1.20138300 | -1.96287600 |
|    |        |                | C  | 5.18795300  | -0.65630600 | -1.17746900 |
|    |        |                | H  | 5.20751000  | -1.42001200 | -0.41286300 |
| 12 | TUPWIK | -2727.71630228 | I  | 2.98078300  | 2.70392500  | 0.61004800  |
|    |        |                | I  | 0.88802500  | -2.52031000 | -0.93914700 |
|    |        |                | Te | 1.92450400  | 0.10349700  | -0.08269500 |
|    |        |                | O  | 4.77681300  | 0.37363600  | -1.54668800 |
|    |        |                | O  | 2.79203900  | -1.72522000 | 2.11382900  |
|    |        |                | C  | 3.81302700  | -0.74782100 | 0.26125700  |
|    |        |                | C  | 4.93929300  | -0.48238100 | -0.52323200 |
|    |        |                | C  | 6.15380700  | -1.09222200 | -0.21367300 |
|    |        |                | C  | 6.22426900  | -1.94183400 | 0.87770700  |
|    |        |                | C  | 5.12642700  | -2.19502200 | 1.68471700  |
|    |        |                | C  | 3.91596000  | -1.58100600 | 1.37786200  |
|    |        |                | C  | 5.90838000  | 0.72429600  | -2.32691400 |
|    |        |                | C  | 2.84042100  | -2.58493000 | 3.24264700  |
|    |        |                | C  | 2.01284000  | 0.53208800  | -2.15938800 |
|    |        |                | H  | 7.03160200  | -0.90713100 | -0.81217900 |
|    |        |                | H  | 7.16764700  | -2.41554100 | 1.11284800  |
|    |        |                | H  | 5.21878000  | -2.85047500 | 2.53581100  |
|    |        |                | H  | 5.55177500  | 1.43905200  | -3.06152900 |
|    |        |                | H  | 6.31802400  | -0.15021300 | -2.83321800 |
|    |        |                | H  | 6.67619400  | 1.18696100  | -1.70612800 |
|    |        |                | H  | 3.07429500  | -3.60536600 | 2.93857800  |
|    |        |                | H  | 3.57677100  | -2.23189300 | 3.96462800  |
|    |        |                | H  | 1.85256800  | -2.55576900 | 3.69066200  |
|    |        |                | H  | 2.45902900  | 1.51257600  | -2.27908000 |
|    |        |                | H  | 0.98024200  | 0.51028800  | -2.49320900 |
|    |        |                | H  | 2.60342200  | -0.24541500 | -2.62775600 |
|    |        |                | I  | -1.06051700 | 2.48400500  | -1.11820300 |
|    |        |                | I  | -3.97840300 | -2.51389500 | -0.42889300 |
|    |        |                | Te | -2.50647400 | -0.06768100 | -0.80027200 |
|    |        |                | O  | -4.73478400 | 1.98485300  | 0.41944200  |
|    |        |                | O  | -1.24120000 | -0.80569500 | 1.68531400  |
|    |        |                | C  | -3.01567900 | 0.57282800  | 1.12540200  |
|    |        |                | C  | -4.01874300 | 1.48825700  | 1.44366400  |
|    |        |                | C  | -4.21805900 | 1.84245800  | 2.77733900  |
|    |        |                | C  | -3.40594300 | 1.28932700  | 3.75493100  |
|    |        |                | C  | -2.39174300 | 0.39303200  | 3.45315600  |
|    |        |                | C  | -2.19847000 | 0.03997900  | 2.12285500  |
|    |        |                | C  | -5.74608100 | 2.93979000  | 0.70169000  |
|    |        |                | C  | -0.38277400 | -1.41500500 | 2.63552500  |
|    |        |                | C  | -4.08932300 | 0.64253000  | -2.02055600 |
|    |        |                | H  | -4.99031100 | 2.54358600  | 3.05156400  |

|    |        |                |    |             |             |             |
|----|--------|----------------|----|-------------|-------------|-------------|
|    |        |                | H  | -3.56517000 | 1.57167000  | 4.78669600  |
|    |        |                | H  | -1.76708300 | -0.01136000 | 4.23393900  |
|    |        |                | H  | -6.17939500 | 3.20533700  | -0.25714200 |
|    |        |                | H  | -6.51414700 | 2.51182200  | 1.34645900  |
|    |        |                | H  | -5.31930000 | 3.82658300  | 1.17091500  |
|    |        |                | H  | -0.95925700 | -1.98707600 | 3.36343000  |
|    |        |                | H  | 0.22229100  | -0.66155100 | 3.14400900  |
|    |        |                | H  | 0.25812700  | -2.07805000 | 2.06240500  |
|    |        |                | H  | -3.98684800 | 1.71637700  | -2.11657700 |
|    |        |                | H  | -3.95261700 | 0.13402200  | -2.97168500 |
|    |        |                | H  | -5.02688300 | 0.36485700  | -1.55586200 |
| 13 | WOPYIM | -1134.79198672 | Te | 0.00041400  | -0.67022800 | -0.17738700 |
|    |        |                | I  | 2.90603800  | -0.67215800 | -0.17691900 |
|    |        |                | I  | -2.90109600 | -0.68863600 | -0.03045600 |
|    |        |                | C  | -0.00537100 | 1.42914400  | -0.01814700 |
|    |        |                | C  | 0.57725200  | 2.05303900  | 1.07572000  |
|    |        |                | H  | 1.04595300  | 1.47979300  | 1.86469400  |
|    |        |                | C  | -0.01354700 | 4.18313900  | 0.12371200  |
|    |        |                | H  | -0.01787400 | 5.26293100  | 0.18068100  |
|    |        |                | C  | -0.58686400 | 2.15992200  | -1.04524300 |
|    |        |                | H  | -1.04881800 | 1.66530700  | -1.88987100 |
|    |        |                | C  | 0.00910300  | -1.12488500 | 1.89217900  |
|    |        |                | H  | -0.69207900 | -0.44765900 | 2.36917600  |
|    |        |                | H  | 1.02147000  | -1.00607300 | 2.26150400  |
|    |        |                | H  | -0.32668000 | -2.15381500 | 1.98050100  |
|    |        |                | C  | -0.58490500 | 3.54594200  | -0.96968100 |
|    |        |                | H  | -1.03421300 | 4.12461100  | -1.76470800 |
|    |        |                | C  | 0.56406900  | 3.43930700  | 1.14442200  |
|    |        |                | H  | 1.01037800  | 3.93522800  | 1.99519900  |
| 14 | WUGVUQ | -2269.58837283 | Te | -1.43823500 | -0.05580900 | -0.47303400 |
|    |        |                | I  | 0.70764900  | -2.19093100 | -0.26328900 |
|    |        |                | I  | 0.56666700  | 2.12365500  | -0.88445200 |
|    |        |                | I  | -3.50146500 | 1.87955600  | -0.76210000 |
|    |        |                | I  | -3.38592100 | -2.13532100 | -0.15514700 |
|    |        |                | C  | -1.33235900 | 0.24625800  | 1.63712100  |
|    |        |                | C  | -0.09696200 | 0.36540100  | 2.26086400  |
|    |        |                | H  | 0.82692100  | 0.31161800  | 1.69891100  |
|    |        |                | C  | -2.51315500 | 0.31752000  | 2.36334000  |
|    |        |                | H  | -3.47331700 | 0.22394000  | 1.87572100  |
|    |        |                | C  | -0.05517200 | 0.55711500  | 3.63586500  |
|    |        |                | H  | 0.90387900  | 0.64893500  | 4.12577500  |
|    |        |                | C  | -2.45593000 | 0.51114700  | 3.73628800  |
|    |        |                | H  | -3.37500000 | 0.56755100  | 4.30302800  |
|    |        |                | C  | -1.22885300 | 0.63037700  | 4.37283100  |
|    |        |                | H  | -1.18662500 | 0.78051700  | 5.44302900  |
|    |        |                | Te | 3.59442600  | -0.19058100 | -1.18272000 |
|    |        |                | C  | 5.31057800  | 0.99428600  | -1.56890400 |
|    |        |                | H  | 5.01876500  | 2.03852300  | -1.50459900 |
|    |        |                | H  | 5.64622500  | 0.76346000  | -2.57599700 |
|    |        |                | H  | 6.07162900  | 0.75414400  | -0.83318000 |
|    |        |                | C  | 4.66486200  | -2.00813000 | -1.06060300 |
|    |        |                | H  | 5.09593800  | -2.18692400 | -2.04185600 |
|    |        |                | H  | 3.96151100  | -2.79631400 | -0.80889800 |
|    |        |                | H  | 5.43875800  | -1.90546400 | -0.30564700 |
|    |        |                | C  | 3.58531900  | 0.21423400  | 0.88226600  |
|    |        |                | C  | 3.58379100  | 1.53932700  | 1.30041700  |
|    |        |                | H  | 3.57532900  | 2.35269400  | 0.58701200  |
|    |        |                | C  | 3.57231500  | -0.82684700 | 1.80120600  |
|    |        |                | H  | 3.55401200  | -1.85916800 | 1.47956200  |
|    |        |                | C  | 3.57042900  | -0.53253800 | 3.15863000  |
|    |        |                | H  | 3.55939300  | -1.33917200 | 3.87849600  |
|    |        |                | C  | 3.58202300  | 1.82258600  | 2.65946500  |
|    |        |                | H  | 3.58034400  | 2.85187600  | 2.99003200  |

|    |        |                |    |             |             |             |
|----|--------|----------------|----|-------------|-------------|-------------|
|    |        |                | C  | 3.57900000  | 0.78834200  | 3.58589200  |
|    |        |                | H  | 3.57766100  | 1.01275800  | 4.64407300  |
| 15 | YODVUK | -1481.29536949 | I  | -3.72570600 | -1.53816900 | 0.55444700  |
|    |        |                | Te | 0.91375200  | -0.25212500 | -0.66746800 |
|    |        |                | C  | -1.22001500 | -0.12992700 | -0.39724300 |
|    |        |                | C  | -1.67326700 | -1.21137800 | 0.21733900  |
|    |        |                | C  | -0.78009200 | -2.33865900 | 0.66215700  |
|    |        |                | H  | -0.97308400 | -3.20237300 | 0.02361200  |
|    |        |                | H  | -1.04226800 | -2.63756500 | 1.67713500  |
|    |        |                | C  | 0.69871700  | -1.94676900 | 0.60056000  |
|    |        |                | H  | 1.34315700  | -2.72248900 | 0.20136600  |
|    |        |                | H  | 1.09421400  | -1.62282700 | 1.56064300  |
|    |        |                | C  | -1.93070500 | 1.06386600  | -0.87550400 |
|    |        |                | C  | -2.62887800 | 1.86979700  | 0.02475100  |
|    |        |                | H  | -2.65773700 | 1.59577100  | 1.07148200  |
|    |        |                | C  | -3.27727700 | 3.01299300  | -0.41776500 |
|    |        |                | H  | -3.81460700 | 3.63137100  | 0.28835100  |
|    |        |                | C  | -3.23415700 | 3.36459700  | -1.76085100 |
|    |        |                | H  | -3.74041900 | 4.25638400  | -2.10420300 |
|    |        |                | C  | -2.53352100 | 2.57190400  | -2.66065300 |
|    |        |                | H  | -2.49492100 | 2.84194400  | -3.70712800 |
|    |        |                | C  | -1.87723900 | 1.43198600  | -2.22028000 |
|    |        |                | H  | -1.33100600 | 0.81640900  | -2.92453500 |
|    |        |                | C  | 1.24915400  | 1.26853500  | 0.74974000  |
|    |        |                | C  | 2.17978700  | 2.25745600  | 0.45839900  |
|    |        |                | H  | 2.76053200  | 2.21905100  | -0.45367900 |
|    |        |                | C  | 2.37393500  | 3.28989400  | 1.36548100  |
|    |        |                | H  | 3.09503700  | 4.06518500  | 1.14670400  |
|    |        |                | C  | 1.65093500  | 3.32157200  | 2.55089800  |
|    |        |                | H  | 1.80978200  | 4.12472000  | 3.25742500  |
|    |        |                | C  | 0.72473900  | 2.32625700  | 2.83299700  |
|    |        |                | H  | 0.16192000  | 2.35064000  | 3.75592600  |
|    |        |                | C  | 0.51266700  | 1.29649600  | 1.92588000  |
|    |        |                | H  | -0.22315400 | 0.53128200  | 2.14222800  |
|    |        |                | I  | 4.04813600  | -0.94916500 | -0.35751100 |
| 16 | ZIQPEU | -1797.60776447 | Te | 0.00820100  | 0.23201200  | -0.04031600 |
|    |        |                | I  | -0.17005900 | 0.47440100  | 2.77377000  |
|    |        |                | C  | 1.90581200  | -0.01784000 | -2.47881900 |
|    |        |                | C  | -0.28622300 | -0.93307100 | -2.99990000 |
|    |        |                | C  | 0.09921300  | 1.45090100  | -3.12600900 |
|    |        |                | N  | 0.44875800  | 0.20689800  | -2.42375400 |
|    |        |                | C  | 2.59919600  | 0.79664200  | -1.42503000 |
|    |        |                | C  | 3.88525400  | 1.28317700  | -1.62278100 |
|    |        |                | C  | 4.54340700  | 1.96467600  | -0.60922900 |
|    |        |                | C  | 3.91723200  | 2.16832900  | 0.61179700  |
|    |        |                | C  | 2.62956800  | 1.69209800  | 0.82228600  |
|    |        |                | C  | 1.97723700  | 1.01314800  | -0.19593000 |
|    |        |                | C  | -0.98267800 | 2.10020700  | -0.28655100 |
|    |        |                | C  | -2.36092400 | 2.07612800  | -0.47069600 |
|    |        |                | C  | -3.04632400 | 3.27263100  | -0.64447500 |
|    |        |                | C  | -2.36178400 | 4.47929200  | -0.63024800 |
|    |        |                | C  | -0.98565300 | 4.49491000  | -0.43922000 |
|    |        |                | C  | -0.29033200 | 3.30622100  | -0.26644700 |
|    |        |                | H  | 2.08717100  | -1.07468100 | -2.27439800 |
|    |        |                | H  | 2.28284100  | 0.21551700  | -3.47776300 |
|    |        |                | H  | -0.00242200 | -1.06526500 | -4.04673300 |
|    |        |                | H  | -1.35502100 | -0.74422000 | -2.92657000 |
|    |        |                | H  | -0.04870100 | -1.83432400 | -2.43591600 |
|    |        |                | H  | 0.33555100  | 1.34477600  | -4.18793200 |
|    |        |                | H  | 0.67013400  | 2.27961800  | -2.71176400 |
|    |        |                | H  | -0.96275500 | 1.65375500  | -3.01020100 |
|    |        |                | H  | 4.37202200  | 1.12064600  | -2.57597500 |
|    |        |                | H  | 5.54471500  | 2.33812200  | -0.77434000 |

|  |  |  |   |             |             |             |
|--|--|--|---|-------------|-------------|-------------|
|  |  |  | H | 4.42513600  | 2.69992400  | 1.40446100  |
|  |  |  | H | 2.14582800  | 1.85391200  | 1.77497200  |
|  |  |  | H | -2.89856800 | 1.13591700  | -0.48068600 |
|  |  |  | H | -4.11792900 | 3.25517800  | -0.78960700 |
|  |  |  | H | -2.89878800 | 5.40842500  | -0.76509500 |
|  |  |  | H | -0.44884400 | 5.43371200  | -0.42380900 |
|  |  |  | H | 0.78104400  | 3.33306300  | -0.12207400 |
|  |  |  | I | 1.85629500  | -2.83700300 | 0.10519500  |
|  |  |  | I | -3.21335200 | -1.70818400 | -0.43644400 |

**Table S14.** CSD refcodes of the starting structures, energies (in Hartree) and coordinates of the optimized structures containing Te...I contacts(from calculation in vacuum).

|   | CSD refcode | E(RM062X)      | Coordinates |             |             |             |
|---|-------------|----------------|-------------|-------------|-------------|-------------|
| 1 | ATIDIQ      | -1327.12696989 | I           | 0.41567500  | 2.51459300  | 0.00410300  |
|   |             |                | I           | -4.21803200 | -0.40787300 | -0.10728600 |
|   |             |                | Te          | -1.02178000 | -0.55052900 | -0.19113200 |
|   |             |                | Te          | 4.24645700  | -1.05279800 | 0.02302500  |
|   |             |                | C           | 1.02372000  | -1.01680600 | -0.01636300 |
|   |             |                | C           | 2.22336100  | -1.18525100 | 0.00009200  |
|   |             |                | C           | 4.22846500  | 1.04354100  | -0.41204900 |
|   |             |                | H           | 3.40053100  | 1.48236400  | 0.14069100  |
|   |             |                | H           | 5.18064500  | 1.45664100  | -0.08910600 |
|   |             |                | H           | 4.08107400  | 1.19075200  | -1.47579400 |
|   |             |                | C           | -1.35999800 | -2.65849200 | 0.05632900  |
|   |             |                | H           | -0.79566500 | -2.99092100 | 0.92343500  |
|   |             |                | H           | -2.42733400 | -2.80820100 | 0.17826200  |
|   |             |                | H           | -0.99104800 | -3.15681100 | -0.83702100 |
|   |             |                | C           | -1.24295200 | -0.08863500 | 1.85612900  |
|   |             |                | H           | -0.24329200 | 0.01200200  | 2.26665100  |
|   |             |                | H           | -1.77755400 | 0.85392200  | 1.88951700  |
| H | -1.82122400 | -0.88908400    | 2.30879400  |             |             |             |
| 2 | BIPFOV      | -2425.75563335 | Te          | -2.28071700 | -0.05671900 | -0.38218300 |
|   |             |                | C           | -3.66818500 | 1.24681400  | 0.57873000  |
|   |             |                | C           | -3.45512200 | 2.61405000  | -0.00573900 |
|   |             |                | C           | -4.39671300 | 3.62759100  | 0.15600300  |
|   |             |                | C           | -4.18555400 | 4.88318500  | -0.39196700 |
|   |             |                | C           | -3.02609100 | 5.13557100  | -1.11503000 |
|   |             |                | C           | -2.08740200 | 4.13027200  | -1.28658300 |
|   |             |                | C           | -2.29075000 | 2.86707000  | -0.73608500 |
|   |             |                | C           | -1.28684100 | 1.76391500  | -0.91562300 |
|   |             |                | C           | -3.32644600 | -0.06432000 | -2.22621200 |
|   |             |                | Te          | 2.28056400  | 0.05613800  | 0.38556500  |
|   |             |                | C           | 1.29904500  | -1.76921900 | 0.92479100  |
|   |             |                | C           | 2.30619900  | -2.86801700 | 0.73672500  |
|   |             |                | C           | 2.10932500  | -4.13386500 | 1.28359400  |
|   |             |                | C           | 3.05016300  | -5.13568100 | 1.10415500  |
|   |             |                | C           | 4.20545300  | -4.87719900 | 0.37652800  |
|   |             |                | C           | 4.41021200  | -3.61902800 | -0.16781800 |
|   |             |                | C           | 3.46641200  | -2.60880500 | 0.00202500  |
|   |             |                | C           | 3.67353500  | -1.23890900 | -0.57846400 |
|   |             |                | C           | 3.33303900  | 0.07236000  | 2.22573600  |
|   |             |                | I           | 0.43693000  | -1.06344900 | -2.66695900 |
|   |             |                | I           | -0.43670300 | 1.04413800  | 2.68004500  |
|   |             |                | I           | -5.12101900 | -2.18370700 | 0.35705600  |
|   |             |                | I           | 5.10344700  | 2.19982900  | -0.36904700 |
|   |             |                | H           | -3.41753700 | 1.20540200  | 1.63843700  |
|   |             |                | H           | -4.66584200 | 0.84171900  | 0.42324500  |
|   |             |                | H           | -5.30038600 | 3.42237900  | 0.71663900  |
| H | -4.92510500 | 5.66257300     | -0.25896300 |             |             |             |
| H | -2.85508200 | 6.11319700     | -1.54717700 |             |             |             |
| H | -1.18229700 | 4.31939500     | -1.85014900 |             |             |             |



|   |        |                |    |             |             |             |
|---|--------|----------------|----|-------------|-------------|-------------|
|   |        |                | H  | -0.44255900 | 1.87087300  | -0.23621800 |
|   |        |                | H  | -0.92075700 | 1.66122300  | -1.93504000 |
|   |        |                | H  | -3.70395600 | 0.94225300  | -2.39545600 |
|   |        |                | H  | -2.60249800 | -0.34993200 | -2.98510000 |
|   |        |                | H  | -4.13317900 | -0.78461600 | -2.13308800 |
|   |        |                | H  | 0.44951000  | -1.87990400 | 0.25257300  |
|   |        |                | H  | 0.94084200  | -1.66870000 | 1.94723600  |
|   |        |                | H  | 1.20735400  | -4.32782000 | 1.85054300  |
|   |        |                | H  | 2.88402700  | -6.11539100 | 1.53347500  |
|   |        |                | H  | 4.94662800  | -5.65390700 | 0.23705500  |
|   |        |                | H  | 5.31051500  | -3.40913900 | -0.73214200 |
|   |        |                | H  | 3.42408700  | -1.19537900 | -1.63830700 |
|   |        |                | H  | 4.66925400  | -0.82988900 | -0.42075600 |
|   |        |                | H  | 4.13710700  | 0.79505500  | 2.12764600  |
|   |        |                | H  | 2.61106600  | 0.35771800  | 2.98662900  |
|   |        |                | H  | 3.71432900  | -0.93258500 | 2.39641000  |
| 3 | BIPTEI | -3247.16290484 | I  | -3.81478100 | 1.88154200  | 1.89880100  |
|   |        |                | I  | -1.87456000 | 2.36194000  | -1.55363500 |
|   |        |                | I  | -0.80992500 | -1.45817500 | -1.76923800 |
|   |        |                | Te | -2.28263700 | 0.27521400  | 0.09272300  |
|   |        |                | C  | -4.09277200 | -0.50196500 | -0.71213400 |
|   |        |                | C  | -4.91188300 | 0.26571200  | -1.52467600 |
|   |        |                | C  | -6.04877800 | -0.30440100 | -2.07662400 |
|   |        |                | C  | -6.35535200 | -1.63256000 | -1.81614900 |
|   |        |                | C  | -5.53802500 | -2.38622900 | -0.99006900 |
|   |        |                | C  | -4.39725800 | -1.83261000 | -0.41119400 |
|   |        |                | C  | -3.54384100 | -2.64364100 | 0.48879700  |
|   |        |                | C  | -3.02514000 | -3.86407900 | 0.05937800  |
|   |        |                | C  | -2.17288600 | -4.58731200 | 0.87592900  |
|   |        |                | C  | -1.82599900 | -4.10162600 | 2.13206500  |
|   |        |                | C  | -2.35203600 | -2.90005600 | 2.57807300  |
|   |        |                | C  | -3.21847700 | -2.17789700 | 1.76433200  |
|   |        |                | H  | -4.67084600 | 1.29875200  | -1.73488800 |
|   |        |                | H  | -6.68964400 | 0.29037700  | -2.71255900 |
|   |        |                | H  | -7.23953000 | -2.07962600 | -2.24955300 |
|   |        |                | H  | -5.78644300 | -3.41541400 | -0.76513900 |
|   |        |                | H  | -3.25981100 | -4.21813900 | -0.93590100 |
|   |        |                | H  | -1.76024200 | -5.52329200 | 0.52499400  |
|   |        |                | H  | -1.15250000 | -4.66581200 | 2.76313400  |
|   |        |                | H  | -2.10319300 | -2.52384600 | 3.56095600  |
|   |        |                | H  | -3.68231900 | -1.27295700 | 2.14361600  |
|   |        |                | I  | 3.81480000  | -1.88181300 | -1.89874900 |
|   |        |                | I  | 1.87454000  | -2.36186300 | 1.55366400  |
|   |        |                | I  | 0.80995900  | 1.45815700  | 1.76916700  |
|   |        |                | Te | 2.28266800  | -0.27526300 | -0.09280300 |
|   |        |                | C  | 4.09283000  | 0.50198600  | 0.71199600  |
|   |        |                | C  | 4.91201400  | -0.26569300 | 1.52446600  |
|   |        |                | C  | 6.04888700  | 0.30444800  | 2.07642600  |
|   |        |                | C  | 6.35535400  | 1.63265500  | 1.81607400  |
|   |        |                | C  | 5.53795300  | 2.38633900  | 0.99008500  |
|   |        |                | C  | 4.39722700  | 1.83268900  | 0.41115700  |
|   |        |                | C  | 3.54373700  | 2.64380400  | -0.48870100 |
|   |        |                | C  | 3.02495900  | 3.86414300  | -0.05909000 |
|   |        |                | C  | 2.17269100  | 4.58747500  | -0.87554500 |
|   |        |                | C  | 1.82584300  | 4.10197700  | -2.13176700 |
|   |        |                | C  | 2.35198100  | 2.90052600  | -2.57797300 |
|   |        |                | C  | 3.21847700  | 2.17830200  | -1.76435200 |
|   |        |                | H  | 4.67104700  | -1.29876000 | 1.73462100  |
|   |        |                | H  | 6.68980600  | -0.29033700 | 2.71230100  |
|   |        |                | H  | 7.23950400  | 2.07974800  | 2.24950800  |
|   |        |                | H  | 5.78628700  | 3.41556700  | 0.76525900  |
|   |        |                | H  | 3.25959200  | 4.21805200  | 0.93625200  |
|   |        |                | H  | 1.75998400  | 5.52336900  | -0.52445800 |

|   |        |                |    |             |             |             |
|---|--------|----------------|----|-------------|-------------|-------------|
|   |        |                | H  | 1.15232300  | 4.66622600  | -2.76275800 |
|   |        |                | H  | 2.10318700  | 2.52445800  | -3.56092200 |
|   |        |                | H  | 3.68245100  | 1.27351200  | -2.14382900 |
| 4 | CIFLEI | -2653.02766707 | Te | 2.78650700  | 0.04865700  | -0.56018000 |
|   |        |                | I  | 1.90427200  | 2.81112000  | -0.46899400 |
|   |        |                | C  | 1.72123600  | -0.39605200 | 1.21957500  |
|   |        |                | C  | 1.80997400  | 0.46549900  | 2.30418400  |
|   |        |                | C  | 1.08428000  | 0.18389100  | 3.45469500  |
|   |        |                | C  | 0.26877700  | -0.93820000 | 3.50839600  |
|   |        |                | C  | 0.19328100  | -1.79519900 | 2.41897400  |
|   |        |                | C  | 0.92534400  | -1.53251600 | 1.26998000  |
|   |        |                | H  | 2.42799300  | 1.35280600  | 2.25499700  |
|   |        |                | H  | 1.15554600  | 0.84820100  | 4.30565200  |
|   |        |                | H  | -0.30513700 | -1.14865300 | 4.40113700  |
|   |        |                | H  | -0.43700700 | -2.67222300 | 2.45591000  |
|   |        |                | H  | 0.87038000  | -2.21101200 | 0.43031300  |
|   |        |                | I  | 3.70305100  | -2.68919600 | -0.72404400 |
|   |        |                | C  | 4.60501800  | 0.59824600  | 0.38121700  |
|   |        |                | C  | 5.05454200  | -0.10228700 | 1.49235400  |
|   |        |                | C  | 5.35189100  | 1.63244800  | -0.16520400 |
|   |        |                | C  | 6.26481300  | 0.25125800  | 2.07041600  |
|   |        |                | H  | 4.47683800  | -0.92256600 | 1.89810700  |
|   |        |                | C  | 6.56963000  | 1.96685100  | 0.41167700  |
|   |        |                | H  | 4.98621800  | 2.19006800  | -1.01735100 |
|   |        |                | C  | 7.02281100  | 1.28102600  | 1.52910000  |
|   |        |                | H  | 6.61763600  | -0.28617900 | 2.93997800  |
|   |        |                | H  | 7.15787300  | 2.76939500  | -0.01155000 |
|   |        |                | H  | 7.96904100  | 1.54860300  | 1.97948700  |
|   |        |                | Te | -3.25882100 | -0.12329800 | -0.87541600 |
|   |        |                | I  | -5.92789300 | 0.37441200  | 0.07694800  |
|   |        |                | C  | -2.99472600 | -1.62151400 | 0.59638300  |
|   |        |                | C  | -3.33797800 | -1.36504600 | 1.91705000  |
|   |        |                | C  | -3.28746100 | -2.40006400 | 2.83961700  |
|   |        |                | C  | -2.91424600 | -3.67662200 | 2.43893500  |
|   |        |                | C  | -2.56067200 | -3.91765100 | 1.11867500  |
|   |        |                | C  | -2.59257900 | -2.88611700 | 0.18876300  |
|   |        |                | H  | -3.66200800 | -0.37877800 | 2.22278200  |
|   |        |                | H  | -3.55616500 | -2.20844700 | 3.86956000  |
|   |        |                | H  | -2.89399500 | -4.48399500 | 3.15854000  |
|   |        |                | H  | -2.26131800 | -4.90839500 | 0.80546400  |
|   |        |                | H  | -2.30266100 | -3.07247400 | -0.83705300 |
|   |        |                | I  | -0.61447400 | -0.64874700 | -1.99034300 |
|   |        |                | C  | -2.54575600 | 1.54308900  | 0.20069800  |
|   |        |                | C  | -1.50613300 | 1.41568200  | 1.11073800  |
|   |        |                | C  | -3.13758500 | 2.77128900  | -0.06384900 |
|   |        |                | C  | -1.07215300 | 2.54945300  | 1.78420700  |
|   |        |                | H  | -1.02943900 | 0.45907300  | 1.29315000  |
|   |        |                | C  | -2.67835900 | 3.89666400  | 0.60314700  |
|   |        |                | H  | -3.96030000 | 2.85430400  | -0.76197300 |
|   |        |                | C  | -1.65250400 | 3.78335100  | 1.53068800  |
|   |        |                | H  | -0.25926200 | 2.46409200  | 2.49099900  |
|   |        |                | H  | -3.12877400 | 4.85841700  | 0.40035700  |
|   |        |                | H  | -1.29642700 | 4.66197000  | 2.05098100  |
| 5 | CIFLOS | -2785.08614268 | Te | -0.01007800 | -0.54848500 | 2.27889700  |
|   |        |                | I  | -2.15126800 | -0.76880300 | -0.03647400 |
|   |        |                | I  | 2.15148800  | -0.76823700 | 0.03634000  |
|   |        |                | I  | -2.08469900 | -0.31892500 | 4.10260200  |
|   |        |                | I  | 1.95229300  | -0.64279500 | 4.22491000  |
|   |        |                | C  | 0.12240500  | 1.56092300  | 2.00193900  |
|   |        |                | C  | 1.36019000  | 2.18370800  | 2.08105400  |
|   |        |                | C  | 1.43088100  | 3.56233500  | 1.94544900  |
|   |        |                | C  | 0.27945700  | 4.30259500  | 1.72186500  |
|   |        |                | C  | -0.94798500 | 3.66505400  | 1.62310300  |

|   |        |                |    |             |             |             |
|---|--------|----------------|----|-------------|-------------|-------------|
|   |        |                | C  | -1.03616800 | 2.28745400  | 1.76602000  |
|   |        |                | H  | 2.26202300  | 1.61421100  | 2.25442900  |
|   |        |                | H  | 2.39179400  | 4.05311400  | 2.01846000  |
|   |        |                | H  | 0.33946600  | 5.37790400  | 1.61878100  |
|   |        |                | H  | -1.84753700 | 4.23622100  | 1.43870700  |
|   |        |                | H  | -1.99909000 | 1.80025700  | 1.70275600  |
|   |        |                | Te | 0.01025600  | -0.54836700 | -2.27902400 |
|   |        |                | I  | -1.95205400 | -0.64316000 | -4.22508000 |
|   |        |                | I  | 2.08484600  | -0.31809600 | -4.10268100 |
|   |        |                | C  | -0.12282700 | 1.56099400  | -2.00196300 |
|   |        |                | C  | 1.03553900  | 2.28784500  | -1.76602300 |
|   |        |                | C  | -1.36079200 | 2.18342700  | -2.08103600 |
|   |        |                | C  | 0.94696400  | 3.66541400  | -1.62305200 |
|   |        |                | H  | 1.99859900  | 1.80091400  | -1.70278500 |
|   |        |                | C  | -1.43187700 | 3.56202800  | -1.94537300 |
|   |        |                | H  | -2.26246600 | 1.61367800  | -2.25440600 |
|   |        |                | C  | -0.28066100 | 4.30260800  | -1.72177500 |
|   |        |                | H  | 1.84635400  | 4.23683200  | -1.43863800 |
|   |        |                | H  | -2.39293100 | 4.05253700  | -2.01835000 |
|   |        |                | H  | -0.34097500 | 5.37789600  | -1.61865200 |
| 6 | CIFLUY | -2785.08851488 | Te | -0.11621100 | 3.41094600  | 0.00077600  |
|   |        |                | I  | 1.06868600  | 1.33638000  | 2.07049100  |
|   |        |                | I  | -1.03382400 | 5.04403600  | 2.03379400  |
|   |        |                | C  | -1.86337200 | 2.18908100  | 0.00029200  |
|   |        |                | C  | -2.38406100 | 1.74956900  | 1.21025300  |
|   |        |                | C  | -3.42212100 | 0.82781000  | 1.20205100  |
|   |        |                | C  | -3.93203000 | 0.35819400  | -0.00045400 |
|   |        |                | H  | -1.97964200 | 2.09373300  | 2.15151200  |
|   |        |                | H  | -3.81786300 | 0.46825300  | 2.14160600  |
|   |        |                | H  | -4.72655700 | -0.37533800 | -0.00076300 |
|   |        |                | I  | 1.06865100  | 1.33708700  | -2.06959500 |
|   |        |                | I  | -1.03332000 | 5.04477200  | -2.03182100 |
|   |        |                | Te | -0.05912500 | -0.75648300 | 0.00017100  |
|   |        |                | C  | -2.38401300 | 1.75051000  | -1.21002600 |
|   |        |                | C  | -3.42208200 | 0.82877200  | -1.20258000 |
|   |        |                | I  | -1.05588700 | -2.35532400 | -2.03178300 |
|   |        |                | I  | -1.05581300 | -2.35601400 | 2.03161300  |
|   |        |                | C  | 1.84969700  | -1.69083000 | -0.00001200 |
|   |        |                | H  | -1.97950500 | 2.09542800  | -2.15097800 |
|   |        |                | H  | -3.81778700 | 0.46994800  | -2.14242800 |
|   |        |                | C  | 2.46756300  | -1.97400700 | -1.20976000 |
|   |        |                | C  | 2.46785000  | -1.97402900 | 1.20958200  |
|   |        |                | C  | 3.72679800  | -2.55594300 | -1.20230600 |
|   |        |                | H  | 1.98268300  | -1.75151000 | -2.14996700 |
|   |        |                | C  | 3.72708100  | -2.55596900 | 1.20181300  |
|   |        |                | H  | 1.98320200  | -1.75153200 | 2.14990700  |
|   |        |                | C  | 4.35552500  | -2.84673400 | -0.00032400 |
|   |        |                | H  | 4.21300400  | -2.77986300 | -2.14165600 |
|   |        |                | H  | 4.21351100  | -2.77991200 | 2.14104100  |
|   |        |                | H  | 5.33696200  | -3.30103300 | -0.00044700 |
| 7 | GEHDON | -4036.39165599 | I  | -0.43381500 | -1.91953100 | -1.70559800 |
|   |        |                | I  | -4.04354000 | 1.49732300  | 1.34795000  |
|   |        |                | Te | -2.26414000 | -0.26967500 | -0.14052100 |
|   |        |                | I  | -1.70049600 | -1.78317000 | 2.19188200  |
|   |        |                | S  | -2.93636900 | 1.11575600  | -2.45874600 |
|   |        |                | C  | -1.76926300 | 4.33404800  | -0.45491000 |
|   |        |                | H  | -1.10660900 | 5.05880500  | -0.92601000 |
|   |        |                | H  | -1.53131200 | 4.26609900  | 0.60480400  |
|   |        |                | C  | -3.26110800 | 4.64588000  | -0.71015200 |
|   |        |                | H  | -3.84266900 | 4.57278400  | 0.20787500  |
|   |        |                | H  | -3.40966600 | 5.62450700  | -1.15996200 |
|   |        |                | C  | -3.89689300 | -1.53853600 | -0.66137200 |
|   |        |                | N  | -1.61738000 | 3.02907000  | -1.08698700 |

|   |        |                |    |             |             |             |
|---|--------|----------------|----|-------------|-------------|-------------|
|   |        |                | H  | -0.73880400 | 2.52719300  | -1.13652800 |
|   |        |                | C  | -2.71210600 | 2.62986300  | -1.70406300 |
|   |        |                | C  | -6.04050000 | -3.14279300 | -1.35120200 |
|   |        |                | H  | -6.87852800 | -3.77141700 | -1.62038700 |
|   |        |                | C  | -5.89047200 | -2.70930300 | -0.04193500 |
|   |        |                | H  | -6.60847900 | -2.99609400 | 0.71408600  |
|   |        |                | C  | -4.03518300 | -1.96822400 | -1.97392200 |
|   |        |                | H  | -3.30932900 | -1.70101200 | -2.72960000 |
|   |        |                | C  | -4.81833700 | -1.90200300 | 0.31000200  |
|   |        |                | H  | -4.71107800 | -1.56391400 | 1.33116300  |
|   |        |                | C  | -5.11428500 | -2.77120800 | -2.31466600 |
|   |        |                | H  | -5.22344200 | -3.10712700 | -3.33669400 |
|   |        |                | N  | -3.65447400 | 3.57899600  | -1.63365400 |
|   |        |                | H  | -4.61566300 | 3.30574100  | -1.75665700 |
|   |        |                | I  | 0.43382200  | 1.91954300  | 1.70558800  |
|   |        |                | I  | 4.04353800  | -1.49734100 | -1.34793200 |
|   |        |                | Te | 2.26413500  | 0.26967600  | 0.14052000  |
|   |        |                | I  | 1.70052200  | 1.78317500  | -2.19188300 |
|   |        |                | S  | 2.93634200  | -1.11577900 | 2.45873600  |
|   |        |                | C  | 1.76928000  | -4.33406600 | 0.45486600  |
|   |        |                | H  | 1.10664000  | -5.05883400 | 0.92597100  |
|   |        |                | H  | 1.53132100  | -4.26612300 | -0.60484700 |
|   |        |                | C  | 3.26113200  | -4.64587600 | 0.71009800  |
|   |        |                | H  | 3.84268800  | -4.57275500 | -0.20792900 |
|   |        |                | H  | 3.40970800  | -5.62450800 | 1.15989100  |
|   |        |                | C  | 3.89688500  | 1.53853100  | 0.66139400  |
|   |        |                | N  | 1.61738200  | -3.02909100 | 1.08694600  |
|   |        |                | H  | 0.73880100  | -2.52722300 | 1.13648500  |
|   |        |                | C  | 2.71210000  | -2.62987800 | 1.70403200  |
|   |        |                | C  | 6.04045600  | 3.14282300  | 1.35125400  |
|   |        |                | H  | 6.87847000  | 3.77146000  | 1.62045100  |
|   |        |                | C  | 5.89045500  | 2.70932900  | 0.04198500  |
|   |        |                | H  | 6.60846900  | 2.99613100  | -0.71402500 |
|   |        |                | C  | 4.03513400  | 1.96824300  | 1.97393900  |
|   |        |                | H  | 3.30925900  | 1.70104300  | 2.72960000  |
|   |        |                | C  | 4.81833500  | 1.90201700  | -0.30996900 |
|   |        |                | H  | 4.71109300  | 1.56393200  | -1.33113200 |
|   |        |                | C  | 5.11422200  | 2.77123900  | 2.31470000  |
|   |        |                | H  | 5.22335200  | 3.10717100  | 3.33672800  |
|   |        |                | N  | 3.65447900  | -3.57900000 | 1.63361600  |
|   |        |                | H  | 4.61566500  | -3.30573300 | 1.75662500  |
| 8 | GIPRUT | -1495.18367650 | C  | 0.29907400  | 1.02155300  | 0.35045300  |
|   |        |                | C  | -0.87333200 | 1.67935700  | 0.75259600  |
|   |        |                | C  | -0.77012500 | 2.74400200  | 1.64494100  |
|   |        |                | H  | -1.67745800 | 3.24392200  | 1.96016800  |
|   |        |                | C  | 0.46215700  | 3.16979600  | 2.11299800  |
|   |        |                | H  | 0.52304100  | 4.00323800  | 2.80012800  |
|   |        |                | C  | 1.61531400  | 2.52834700  | 1.69408200  |
|   |        |                | H  | 2.58541100  | 2.85447900  | 2.04772100  |
|   |        |                | C  | 1.55186300  | 1.44848100  | 0.81618100  |
|   |        |                | C  | -2.23299200 | 1.29339300  | 0.27772700  |
|   |        |                | C  | -2.68387900 | 1.71608400  | -0.97905900 |
|   |        |                | C  | -3.95971800 | 1.35281900  | -1.39102600 |
|   |        |                | H  | -4.30969200 | 1.67958900  | -2.36387700 |
|   |        |                | C  | -4.80029900 | 0.59166100  | -0.58660700 |
|   |        |                | C  | -4.34430800 | 0.21631400  | 0.66931000  |
|   |        |                | H  | -4.99100600 | -0.36448100 | 1.31745200  |
|   |        |                | C  | -3.07480800 | 0.56131700  | 1.12065500  |
|   |        |                | C  | -1.81748700 | 2.56275700  | -1.87034300 |
|   |        |                | H  | -1.36097500 | 3.38388000  | -1.31669800 |
|   |        |                | H  | -2.39996200 | 2.97852800  | -2.69034200 |
|   |        |                | H  | -1.00632500 | 1.97180700  | -2.30126700 |
|   |        |                | C  | -6.15891800 | 0.17087600  | -1.07413300 |

|   |        |                |    |             |             |             |
|---|--------|----------------|----|-------------|-------------|-------------|
|   |        |                | H  | -6.84392900 | 0.00938100  | -0.24300600 |
|   |        |                | H  | -6.09237300 | -0.76355800 | -1.63465500 |
|   |        |                | H  | -6.59039900 | 0.92118700  | -1.73563300 |
|   |        |                | C  | -2.63536700 | 0.16182200  | 2.50383700  |
|   |        |                | H  | -1.59764800 | -0.17099000 | 2.51484500  |
|   |        |                | H  | -3.25780000 | -0.64608000 | 2.88505900  |
|   |        |                | H  | -2.71279300 | 1.00386100  | 3.19526300  |
|   |        |                | C  | 2.82847800  | 0.79978200  | 0.39815800  |
|   |        |                | C  | 3.31559000  | -0.29822500 | 1.11555200  |
|   |        |                | C  | 4.50695100  | -0.88636900 | 0.71284300  |
|   |        |                | H  | 4.88244200  | -1.74208600 | 1.26279000  |
|   |        |                | C  | 5.22308700  | -0.41425900 | -0.38201300 |
|   |        |                | C  | 4.71637000  | 0.67327800  | -1.08078800 |
|   |        |                | H  | 5.25660800  | 1.04951600  | -1.94217400 |
|   |        |                | C  | 3.52751400  | 1.29208800  | -0.70647600 |
|   |        |                | C  | 2.53770500  | -0.85747800 | 2.27396400  |
|   |        |                | H  | 3.09229200  | -1.65373400 | 2.76630600  |
|   |        |                | H  | 1.58310300  | -1.26796100 | 1.93358100  |
|   |        |                | H  | 2.30906300  | -0.08548400 | 3.00979400  |
|   |        |                | C  | 6.52398900  | -1.05448200 | -0.78064000 |
|   |        |                | H  | 6.76960800  | -0.83566100 | -1.81861500 |
|   |        |                | H  | 6.48303800  | -2.13623700 | -0.65774000 |
|   |        |                | H  | 7.34227900  | -0.68441200 | -0.15998100 |
|   |        |                | C  | 2.99726600  | 2.46143900  | -1.49352900 |
|   |        |                | H  | 2.91617100  | 3.35384000  | -0.87118400 |
|   |        |                | H  | 1.99474700  | 2.26174200  | -1.88013400 |
|   |        |                | H  | 3.64678700  | 2.68750200  | -2.33667600 |
|   |        |                | Te | 0.26735500  | -0.56995000 | -1.06118200 |
|   |        |                | I  | -1.15040400 | -2.43435000 | 0.28015600  |
| 9 | GOCROI | -1608.74639581 | Te | 0.74275700  | 0.18440400  | 0.20273600  |
|   |        |                | N  | -2.77131000 | -0.26845900 | 0.22396400  |
|   |        |                | N  | -2.02005000 | -1.27247600 | -0.23668800 |
|   |        |                | N  | -2.73611400 | -2.09304600 | -0.91473800 |
|   |        |                | C  | 2.22964100  | 1.03789900  | 1.43694700  |
|   |        |                | H  | 2.94795200  | 0.25483900  | 1.66029900  |
|   |        |                | H  | 1.75726600  | 1.45827300  | 2.32074200  |
|   |        |                | H  | 2.68529700  | 1.82333000  | 0.84415900  |
|   |        |                | C  | -4.02330500 | -1.62145500 | -0.91751400 |
|   |        |                | C  | -5.19083500 | -2.12741100 | -1.50103800 |
|   |        |                | H  | -5.16836200 | -3.04649300 | -2.06959100 |
|   |        |                | C  | -6.34798600 | -1.40689100 | -1.32256400 |
|   |        |                | H  | -7.27205100 | -1.76037300 | -1.75945500 |
|   |        |                | C  | -6.36251900 | -0.20201900 | -0.58305500 |
|   |        |                | H  | -7.29630000 | 0.33400300  | -0.47800700 |
|   |        |                | C  | -5.22584800 | 0.31011600  | -0.00273100 |
|   |        |                | H  | -5.23518100 | 1.23905000  | 0.54983600  |
|   |        |                | C  | -4.05266700 | -0.43138600 | -0.18376200 |
|   |        |                | C  | -2.20508600 | 0.83669100  | 0.99223500  |
|   |        |                | H  | -2.94287900 | 1.08713000  | 1.75794700  |
|   |        |                | H  | -2.08219900 | 1.70785100  | 0.34529500  |
|   |        |                | C  | -0.88335800 | 0.48328800  | 1.64194800  |
|   |        |                | H  | -0.96549300 | -0.41489600 | 2.25140200  |
|   |        |                | H  | -0.57716500 | 1.33576800  | 2.24287700  |
|   |        |                | C  | 1.00225800  | -1.79479400 | 0.94920700  |
|   |        |                | C  | 0.87939600  | -2.87208100 | 0.08227400  |
|   |        |                | H  | 0.69821700  | -2.70228000 | -0.97078100 |
|   |        |                | C  | 1.01068100  | -4.16475100 | 0.56659300  |
|   |        |                | H  | 0.91444000  | -5.00163300 | -0.11220200 |
|   |        |                | C  | 1.27597200  | -4.38521500 | 1.91225600  |
|   |        |                | H  | 1.38690800  | -5.39533200 | 2.28466600  |
|   |        |                | C  | 1.40380300  | -3.30875300 | 2.77705800  |
|   |        |                | H  | 1.61616400  | -3.47321400 | 3.82560700  |
|   |        |                | C  | 1.26091000  | -2.01272600 | 2.29519700  |

|    |        |                |    |             |             |             |
|----|--------|----------------|----|-------------|-------------|-------------|
|    |        |                | H  | 1.35955600  | -1.17665500 | 2.97844500  |
|    |        |                | I  | 0.03115000  | 3.64666000  | 0.19935700  |
|    |        |                | I  | 3.43331200  | -0.63654000 | -1.49331100 |
| 10 | LADXEV | -3249.98554157 | Te | -1.88297800 | 0.06539800  | 1.27999400  |
|    |        |                | I  | 1.00498200  | 1.22544000  | 1.51957200  |
|    |        |                | I  | -2.53177400 | 1.24169500  | 3.68080300  |
|    |        |                | I  | -4.47837200 | -0.81950200 | 0.80483100  |
|    |        |                | C  | -1.63713200 | -2.97572100 | 1.65461000  |
|    |        |                | H  | -2.31089100 | -3.01864800 | 0.81038900  |
|    |        |                | O  | -2.76226900 | 2.59599900  | 0.25596800  |
|    |        |                | C  | -1.24009000 | -1.75658400 | 2.18982500  |
|    |        |                | C  | -0.37563000 | -1.70807600 | 3.27691200  |
|    |        |                | H  | -0.06837700 | -0.76165400 | 3.69985900  |
|    |        |                | C  | -4.01616700 | 3.27778000  | 0.32620200  |
|    |        |                | H  | -3.89169300 | 4.17592400  | 0.93643000  |
|    |        |                | H  | -4.74114400 | 2.62147700  | 0.80843100  |
|    |        |                | C  | -1.15729300 | -4.15377900 | 2.21045900  |
|    |        |                | H  | -1.46652500 | -5.10207400 | 1.79284100  |
|    |        |                | C  | -0.28641200 | -4.11334900 | 3.28992500  |
|    |        |                | H  | 0.08805200  | -5.03360700 | 3.71805700  |
|    |        |                | C  | 0.10000700  | -2.89173200 | 3.82328100  |
|    |        |                | H  | 0.77261000  | -2.85331200 | 4.66952500  |
|    |        |                | C  | -4.37567300 | 3.62470800  | -1.11359600 |
|    |        |                | H  | -5.01058900 | 4.50522900  | -1.18474800 |
|    |        |                | H  | -4.88994200 | 2.78557100  | -1.58433000 |
|    |        |                | C  | -2.99391900 | 3.81147400  | -1.74173900 |
|    |        |                | H  | -2.99111800 | 3.71383800  | -2.82535200 |
|    |        |                | H  | -2.58291500 | 4.78785800  | -1.47950000 |
|    |        |                | C  | -2.20282800 | 2.70610200  | -1.05822900 |
|    |        |                | H  | -1.13677100 | 2.91637400  | -0.96117900 |
|    |        |                | H  | -2.32620000 | 1.75305000  | -1.58402500 |
|    |        |                | Te | 1.88297800  | -0.06539800 | -1.27999400 |
|    |        |                | I  | -1.00498200 | -1.22544000 | -1.51957200 |
|    |        |                | I  | 2.53177400  | -1.24169500 | -3.68080300 |
|    |        |                | I  | 4.47837200  | 0.81950200  | -0.80483100 |
|    |        |                | C  | 1.63713200  | 2.97572100  | -1.65461000 |
|    |        |                | H  | 2.31089100  | 3.01864800  | -0.81038900 |
|    |        |                | O  | 2.76226900  | -2.59599900 | -0.25596800 |
|    |        |                | C  | 1.24009000  | 1.75658400  | -2.18982500 |
|    |        |                | C  | 0.37563000  | 1.70807600  | -3.27691200 |
|    |        |                | H  | 0.06837700  | 0.76165400  | -3.69985900 |
|    |        |                | C  | 4.01616700  | -3.27778000 | -0.32620200 |
|    |        |                | H  | 3.89169300  | -4.17592400 | -0.93643000 |
|    |        |                | H  | 4.74114400  | -2.62147700 | -0.80843100 |
|    |        |                | C  | 1.15729300  | 4.15377900  | -2.21045900 |
|    |        |                | H  | 1.46652500  | 5.10207400  | -1.79284100 |
|    |        |                | C  | 0.28641200  | 4.11334900  | -3.28992500 |
|    |        |                | H  | -0.08805200 | 5.03360700  | -3.71805700 |
|    |        |                | C  | -0.10000700 | 2.89173200  | -3.82328100 |
|    |        |                | H  | -0.77261000 | 2.85331200  | -4.66952500 |
|    |        |                | C  | 4.37567300  | -3.62470800 | 1.11359600  |
|    |        |                | H  | 5.01058900  | -4.50522900 | 1.18474800  |
|    |        |                | H  | 4.88994200  | -2.78557100 | 1.58433000  |
|    |        |                | C  | 2.99391900  | -3.81147400 | 1.74173900  |
|    |        |                | H  | 2.99111800  | -3.71383800 | 2.82535200  |
|    |        |                | H  | 2.58291500  | -4.78785800 | 1.47950000  |
|    |        |                | C  | 2.20282800  | -2.70610200 | 1.05822900  |
|    |        |                | H  | 1.13677100  | -2.91637400 | 0.96117900  |
|    |        |                | H  | 2.32620000  | -1.75305000 | 1.58402500  |
| 11 | MECGOR | -3380.56798544 | I  | -2.48472400 | 2.56986800  | -0.16006400 |
|    |        |                | I  | -4.70224100 | -0.24211800 | -2.27762700 |
|    |        |                | I  | -0.75315100 | -0.39908900 | 2.06189700  |
|    |        |                | I  | -2.97114000 | -3.25504100 | 0.01051300  |

|    |        |                |    |             |             |             |
|----|--------|----------------|----|-------------|-------------|-------------|
|    |        |                | Te | -2.69317000 | -0.32762000 | -0.08101500 |
|    |        |                | C  | -4.28882100 | -0.16827600 | 1.35044800  |
|    |        |                | C  | -4.28912000 | -0.98585100 | 2.47153300  |
|    |        |                | H  | -3.49581800 | -1.70313000 | 2.62632400  |
|    |        |                | C  | -5.31873700 | -0.88006700 | 3.39688400  |
|    |        |                | H  | -5.31306100 | -1.51863400 | 4.27063300  |
|    |        |                | C  | -6.34331600 | 0.03491900  | 3.20319200  |
|    |        |                | H  | -7.14485600 | 0.11515000  | 3.92696300  |
|    |        |                | C  | -6.33593200 | 0.84740500  | 2.07873700  |
|    |        |                | H  | -7.13006900 | 1.56482300  | 1.91721200  |
|    |        |                | C  | -5.30893900 | 0.75016200  | 1.14924500  |
|    |        |                | H  | -5.30779900 | 1.38684700  | 0.27603100  |
|    |        |                | I  | 3.34340300  | -3.04545800 | -0.03189500 |
|    |        |                | I  | 4.82219700  | 0.16912800  | 2.20207300  |
|    |        |                | I  | 0.74518100  | -0.47465400 | -1.97089300 |
|    |        |                | I  | 2.20230000  | 2.68532500  | 0.23087000  |
|    |        |                | Te | 2.73465000  | -0.15982700 | 0.10281700  |
|    |        |                | C  | 4.23639700  | 0.19359700  | -1.39314600 |
|    |        |                | C  | 3.96792100  | 1.05731200  | -2.44519300 |
|    |        |                | H  | 3.01056700  | 1.55402600  | -2.51604200 |
|    |        |                | C  | 4.93938700  | 1.28219600  | -3.41133100 |
|    |        |                | H  | 4.72456400  | 1.95492600  | -4.23137800 |
|    |        |                | C  | 6.17148300  | 0.65027400  | -3.32619700 |
|    |        |                | H  | 6.92674700  | 0.82763100  | -4.08176000 |
|    |        |                | C  | 6.43125200  | -0.21080600 | -2.26988600 |
|    |        |                | H  | 7.38869200  | -0.70970100 | -2.19353400 |
|    |        |                | C  | 5.46517200  | -0.44328000 | -1.30018600 |
|    |        |                | H  | 5.67065800  | -1.11764100 | -0.48129900 |
| 12 | TUPWIK | -2727.70283788 | I  | -2.18412800 | -2.55793000 | 1.02738600  |
|    |        |                | I  | -1.59590800 | 2.57089100  | -1.65930200 |
|    |        |                | Te | -1.82712900 | 0.01042600  | -0.26028400 |
|    |        |                | O  | -4.75728200 | -1.19879100 | -0.84599100 |
|    |        |                | O  | -2.70035200 | 2.19116200  | 1.60407200  |
|    |        |                | C  | -3.77079300 | 0.54559500  | 0.35668000  |
|    |        |                | C  | -4.92334100 | -0.14357600 | -0.02686400 |
|    |        |                | C  | -6.16917000 | 0.28251200  | 0.42998200  |
|    |        |                | C  | -6.24613600 | 1.39249500  | 1.25426200  |
|    |        |                | C  | -5.11429000 | 2.08077800  | 1.65738700  |
|    |        |                | C  | -3.87111500 | 1.63559100  | 1.21920600  |
|    |        |                | C  | -5.84092200 | -2.08590600 | -1.03713100 |
|    |        |                | C  | -2.72541100 | 3.50621300  | 2.12092600  |
|    |        |                | C  | -2.26540800 | -0.78848800 | -2.17717500 |
|    |        |                | H  | -7.06795600 | -0.23712400 | 0.13714400  |
|    |        |                | H  | -7.21605300 | 1.72609300  | 1.59750000  |
|    |        |                | H  | -5.19760900 | 2.93387100  | 2.31247600  |
|    |        |                | H  | -5.44412400 | -2.92263900 | -1.60405200 |
|    |        |                | H  | -6.64543900 | -1.61054500 | -1.60125500 |
|    |        |                | H  | -6.21986900 | -2.44219800 | -0.07788400 |
|    |        |                | H  | -3.26160200 | 4.17325500  | 1.44423200  |
|    |        |                | H  | -3.18147700 | 3.53196600  | 3.11237500  |
|    |        |                | H  | -1.68878000 | 3.82278200  | 2.19215400  |
|    |        |                | H  | -2.43041400 | -1.85396800 | -2.06222900 |
|    |        |                | H  | -1.38995700 | -0.56979900 | -2.77973700 |
|    |        |                | H  | -3.14324000 | -0.27354500 | -2.54899100 |
|    |        |                | I  | 1.15465000  | -2.09551800 | -1.74767400 |
|    |        |                | I  | 5.40087000  | 1.03566300  | 0.65307100  |
|    |        |                | Te | 3.28358400  | -0.44862700 | -0.61626200 |
|    |        |                | O  | 1.77291500  | -1.82850600 | 1.89777700  |
|    |        |                | O  | 2.12553400  | 2.21255900  | -0.37202400 |
|    |        |                | C  | 1.92042900  | 0.23331900  | 0.81601300  |
|    |        |                | C  | 1.37803900  | -0.54553200 | 1.83860500  |
|    |        |                | C  | 0.48097300  | 0.03781300  | 2.73323500  |
|    |        |                | C  | 0.15380100  | 1.37707300  | 2.58743300  |

|    |        |                |    |             |             |             |
|----|--------|----------------|----|-------------|-------------|-------------|
|    |        |                | C  | 0.67965200  | 2.16014900  | 1.57210500  |
|    |        |                | C  | 1.56337300  | 1.57448600  | 0.67249900  |
|    |        |                | C  | 1.29663900  | -2.63479700 | 2.96181600  |
|    |        |                | C  | 2.03038300  | 3.62587600  | -0.43486900 |
|    |        |                | C  | 4.12544500  | -2.17943100 | 0.27977600  |
|    |        |                | H  | 0.03485100  | -0.54556900 | 3.52304500  |
|    |        |                | H  | -0.54936400 | 1.81738300  | 3.28142000  |
|    |        |                | H  | 0.39316400  | 3.19408200  | 1.46087500  |
|    |        |                | H  | 1.74630900  | -3.61228700 | 2.81581200  |
|    |        |                | H  | 1.61039300  | -2.22416900 | 3.92360500  |
|    |        |                | H  | 0.21133500  | -2.72394600 | 2.92210900  |
|    |        |                | H  | 2.42649700  | 4.06989400  | 0.47998800  |
|    |        |                | H  | 0.99699100  | 3.93243000  | -0.59748900 |
|    |        |                | H  | 2.63896900  | 3.92660100  | -1.28155500 |
|    |        |                | H  | 3.42326200  | -2.99609100 | 0.16432900  |
|    |        |                | H  | 5.05285900  | -2.35079700 | -0.26131300 |
|    |        |                | H  | 4.32557000  | -1.95031200 | 1.31939800  |
| 13 | WOPYIM | -1134.78239442 | Te | 0.00997300  | -0.64891400 | -0.18758300 |
|    |        |                | I  | 2.89722500  | -0.67748400 | -0.18047000 |
|    |        |                | I  | -2.87476800 | -0.73563000 | -0.00726200 |
|    |        |                | C  | -0.02040800 | 1.45878600  | -0.03470800 |
|    |        |                | C  | 0.76712200  | 2.10319200  | 0.90828300  |
|    |        |                | H  | 1.42029500  | 1.54326500  | 1.56440200  |
|    |        |                | C  | -0.07336700 | 4.21386000  | 0.11602800  |
|    |        |                | H  | -0.09494900 | 5.29339000  | 0.17665000  |
|    |        |                | C  | -0.82956600 | 2.17282700  | -0.90706200 |
|    |        |                | H  | -1.45975200 | 1.66204500  | -1.62294200 |
|    |        |                | C  | 0.02678000  | -1.08097500 | 1.89055200  |
|    |        |                | H  | -0.68341000 | -0.40374800 | 2.35412700  |
|    |        |                | H  | 1.03969100  | -0.94983500 | 2.25460300  |
|    |        |                | H  | -0.30548300 | -2.10974700 | 1.99643300  |
|    |        |                | C  | -0.84631600 | 3.55830800  | -0.83151700 |
|    |        |                | H  | -1.47187900 | 4.12174300  | -1.50993600 |
|    |        |                | C  | 0.72806400  | 3.48798700  | 0.98626000  |
|    |        |                | H  | 1.33280200  | 3.99757300  | 1.72371900  |
| 14 | WUGVUQ | -2269.56572417 | Te | -1.40569400 | 0.00014100  | -0.42817700 |
|    |        |                | I  | 0.70484300  | -2.29802400 | -0.52397300 |
|    |        |                | I  | 0.70477200  | 2.29838200  | -0.52387900 |
|    |        |                | I  | -3.35213500 | 1.99942300  | -0.43548600 |
|    |        |                | I  | -3.35192000 | -1.99939600 | -0.43590100 |
|    |        |                | C  | -1.24610100 | -0.00005400 | 1.69603400  |
|    |        |                | C  | 0.00837300  | -0.00019300 | 2.28841800  |
|    |        |                | H  | 0.90907400  | 0.00026500  | 1.69108500  |
|    |        |                | C  | -2.40273900 | -0.00040600 | 2.46140500  |
|    |        |                | H  | -3.37811900 | -0.00028600 | 1.99438200  |
|    |        |                | C  | 0.09875100  | -0.00083500 | 3.67340200  |
|    |        |                | H  | 1.07615300  | -0.00148100 | 4.13625900  |
|    |        |                | C  | -2.29817600 | -0.00093600 | 3.84466100  |
|    |        |                | H  | -3.19755900 | -0.00119900 | 4.44494400  |
|    |        |                | C  | -1.05012800 | -0.00124500 | 4.45067100  |
|    |        |                | H  | -0.97373100 | -0.00176900 | 5.52970600  |
|    |        |                | Te | 3.16315600  | -0.00028000 | -1.27464200 |
|    |        |                | C  | 4.58383600  | 1.55104700  | -1.62372600 |
|    |        |                | H  | 4.08613700  | 2.49715300  | -1.42718800 |
|    |        |                | H  | 4.88144900  | 1.50310500  | -2.66846900 |
|    |        |                | H  | 5.44005200  | 1.41526900  | -0.96932900 |
|    |        |                | C  | 4.58379400  | -1.55166100 | -1.62333500 |
|    |        |                | H  | 4.88047600  | -1.50459100 | -2.66839900 |
|    |        |                | H  | 4.08686200  | -2.49788500 | -1.42545400 |
|    |        |                | H  | 5.44060700  | -1.41487400 | -0.96990600 |
|    |        |                | C  | 3.48996900  | 0.00007700  | 0.81091000  |
|    |        |                | C  | 3.59683400  | 1.20834200  | 1.48717700  |
|    |        |                | H  | 3.48348100  | 2.14947700  | 0.96707300  |



|    |        |                |    |             |             |             |
|----|--------|----------------|----|-------------|-------------|-------------|
|    |        |                | C  | 3.59674400  | -1.20782000 | 1.48781200  |
|    |        |                | H  | 3.48350600  | -2.14925400 | 0.96818800  |
|    |        |                | C  | 3.81627400  | -1.20195300 | 2.85868200  |
|    |        |                | H  | 3.89147200  | -2.14100400 | 3.38939100  |
|    |        |                | C  | 3.81634400  | 1.20320900  | 2.85804000  |
|    |        |                | H  | 3.89159400  | 2.14255100  | 3.38822800  |
|    |        |                | C  | 3.92662100  | 0.00080900  | 3.54228200  |
|    |        |                | H  | 4.09350200  | 0.00109400  | 4.61114900  |
| 15 | YODVUK | -1481.27853340 | I  | -3.75071200 | -1.50900700 | 0.52908700  |
|    |        |                | Te | 0.97417800  | -0.29128600 | -0.62123300 |
|    |        |                | C  | -1.19355200 | -0.10590200 | -0.34059100 |
|    |        |                | C  | -1.68195200 | -1.17937700 | 0.25537600  |
|    |        |                | C  | -0.81294000 | -2.32009000 | 0.72074600  |
|    |        |                | H  | -1.00645000 | -3.18315000 | 0.08015600  |
|    |        |                | H  | -1.10511500 | -2.61732400 | 1.72872500  |
|    |        |                | C  | 0.66870000  | -1.94709100 | 0.69001100  |
|    |        |                | H  | 1.32490100  | -2.73880100 | 0.34342300  |
|    |        |                | H  | 1.04041300  | -1.58973700 | 1.64849200  |
|    |        |                | C  | -1.87433500 | 1.08881100  | -0.85083900 |
|    |        |                | C  | -2.64318800 | 1.88592000  | -0.00159300 |
|    |        |                | H  | -2.75688000 | 1.59895000  | 1.03564500  |
|    |        |                | C  | -3.25583000 | 3.03345100  | -0.47930200 |
|    |        |                | H  | -3.84874800 | 3.64214500  | 0.18989700  |
|    |        |                | C  | -3.10931500 | 3.40240600  | -1.80959100 |
|    |        |                | H  | -3.58850600 | 4.29799200  | -2.18065400 |
|    |        |                | C  | -2.34100000 | 2.62004700  | -2.66032100 |
|    |        |                | H  | -2.22242900 | 2.90123500  | -3.69789200 |
|    |        |                | C  | -1.72010100 | 1.47619500  | -2.18296300 |
|    |        |                | H  | -1.12381800 | 0.86771600  | -2.85211800 |
|    |        |                | C  | 1.30470900  | 1.29332300  | 0.73721600  |
|    |        |                | C  | 2.35282400  | 2.17190900  | 0.49666800  |
|    |        |                | H  | 3.02620400  | 2.01047100  | -0.33447400 |
|    |        |                | C  | 2.55176900  | 3.24002000  | 1.35874300  |
|    |        |                | H  | 3.36557200  | 3.92820000  | 1.17627200  |
|    |        |                | C  | 1.72070200  | 3.41588800  | 2.45690400  |
|    |        |                | H  | 1.88592800  | 4.24484700  | 3.13165000  |
|    |        |                | C  | 0.68072800  | 2.52873700  | 2.69296500  |
|    |        |                | H  | 0.03438300  | 2.66179800  | 3.54982500  |
|    |        |                | C  | 0.46131100  | 1.46696900  | 1.82507700  |
|    |        |                | H  | -0.36248500 | 0.78641600  | 2.00101000  |
|    |        |                | I  | 3.90219400  | -1.02101500 | -0.35865100 |
| 16 | ZIQPEU | -1797.52601733 | Te | -0.00110100 | -0.04041900 | 0.11570700  |
|    |        |                | I  | 0.29972300  | 1.21467400  | 2.64936400  |
|    |        |                | C  | 1.44745200  | -0.66105700 | -2.63512900 |
|    |        |                | C  | -0.06470000 | -2.45951400 | -2.09421100 |
|    |        |                | C  | -0.93682900 | -0.41916900 | -3.02800800 |
|    |        |                | N  | 0.09726900  | -0.99479600 | -2.15922000 |
|    |        |                | C  | 1.90300700  | 0.67504600  | -2.12900300 |
|    |        |                | C  | 2.79274700  | 1.44513700  | -2.86944000 |
|    |        |                | C  | 3.30190700  | 2.62704200  | -2.35475300 |
|    |        |                | C  | 2.91849900  | 3.04650400  | -1.08928900 |
|    |        |                | C  | 2.01879500  | 2.29378200  | -0.34742100 |
|    |        |                | C  | 1.51388200  | 1.11039900  | -0.86514300 |
|    |        |                | C  | -1.43442500 | 1.51026800  | -0.40165800 |
|    |        |                | C  | -2.62903100 | 1.53664500  | 0.31251500  |
|    |        |                | C  | -3.56505500 | 2.52874000  | 0.06474800  |
|    |        |                | C  | -3.32194000 | 3.49866100  | -0.89853400 |
|    |        |                | C  | -2.13036100 | 3.47964700  | -1.60557500 |
|    |        |                | C  | -1.18313600 | 2.49318600  | -1.35203200 |
|    |        |                | H  | 2.13145000  | -1.41173300 | -2.23217500 |
|    |        |                | H  | 1.47626900  | -0.70287600 | -3.73000400 |
|    |        |                | H  | 0.15071100  | -2.88205500 | -3.08221800 |
|    |        |                | H  | -1.08477100 | -2.69293200 | -1.80129200 |

|  |  |  |   |             |             |             |
|--|--|--|---|-------------|-------------|-------------|
|  |  |  | H | 0.63166900  | -2.86253200 | -1.36065900 |
|  |  |  | H | -0.91655600 | -0.92460500 | -4.00014400 |
|  |  |  | H | -0.74758800 | 0.64163600  | -3.17545300 |
|  |  |  | H | -1.91206000 | -0.55991000 | -2.56097800 |
|  |  |  | H | 3.09243600  | 1.10494100  | -3.85352500 |
|  |  |  | H | 3.99564300  | 3.21720200  | -2.93887000 |
|  |  |  | H | 3.31191600  | 3.96590300  | -0.67660300 |
|  |  |  | H | 1.71235000  | 2.63436500  | 0.63162700  |
|  |  |  | H | -2.83920400 | 0.77700900  | 1.05194000  |
|  |  |  | H | -4.49096200 | 2.53458400  | 0.62413400  |
|  |  |  | H | -4.05758900 | 4.26826700  | -1.09384300 |
|  |  |  | H | -1.92557000 | 4.23525700  | -2.35303100 |
|  |  |  | H | -0.25175500 | 2.51459900  | -1.90119600 |
|  |  |  | I | 2.75598900  | -1.92620900 | 0.57629800  |
|  |  |  | I | -3.10637100 | -1.94928900 | -0.03117800 |
